# Supplementary material for: Bioisosteric-replacement-driven optimization of 4-methoxynaphthalene-N-acylhydrazones with anti-Paracoccidioides activity
Source: Royal Society of Chemistry journal article supplement (doi:10.1039/d3nj01975f), 2023-01-01
Supplement: d3nj01975f1.pdf [file d3nj01975f1.pdf]

**Bioisosteric-replacement-driven optimization of 4-  
methoxynaphthalene-N-acylhydrazones with anti-*Paracoccidioides*  
activity**

Amanda Alves de Oliveira<sup>1†\*</sup>, Lívia do Carmo Silva<sup>2†\*</sup>, Andrew Matheus Frederico Rozada<sup>3</sup>, Vinícius Alexandre Fiaia Costa <sup>4</sup>, Célia Maria de Almeida Soares<sup>2</sup>, Flavio Augusto Vicente Seixas <sup>5</sup>, Bruno Junior Neves<sup>4</sup>, Gisele Freitas Gauze<sup>3</sup>, Maristela Pereira<sup>2</sup>

<sup>1</sup> Institute of Tropical Pathology and Public Health, Federal University of Goiás, CEP: 74605-050, Goiânia, Goiás, Brazil.

<sup>2</sup> Laboratory for Molecular Biology, Institute of Biological Sciences, Federal University of Goiás, CEP: 74690-900, Goiânia, Goiás, Brazil.

<sup>3</sup> Chemistry Department, State University of Maringá, 87020-900, Maringá, Paraná, Brazil.

<sup>4</sup> LabChem – Laboratory of Cheminformatics, Faculty of Pharmacy, Federal University of Goiás, 74605-170, Goiânia, Goiás, Brazil.

<sup>5</sup> Department of Technology, State University of Maringá, 87506-370, Umuarama, Paraná, Brazil

† These authors contributed equally to this work

**Corresponding author**

\* Laboratory for Molecular Biology, Federal University of Goiás, Avenida Esperança, s/n, ICB2, Sala 206, Goiânia, GO, 74690-900, Brazil; Telephone: +55 62 3521-1110; E-mail: liviacarmo.bio@gmail.com; o.amanda.alves@gmail.com.

**Table S1.** The vROC analysis result. The statistics of the shape-based model using three scoring functions (RefTverskyCombo, TanimotoCombo, and FitTverskyCombo)

| ROCS Rank | SMILES                                                      | ROCS Tanimoto Combo | ROCS Shape Tanimoto | ROCS Color Tanimoto | ROCS Ref Tversky | ROCS Ref Color Tversky | ROCS RefTversky Combo | ROCS FitTversky | ROCS FitColor Tversky | ROCS FitTversky Combo | ROCS Scaled Color | ROCS Combo Score | ROCS Color Score | ROCS Overlap |
|-----------|-------------------------------------------------------------|---------------------|---------------------|---------------------|------------------|------------------------|-----------------------|-----------------|-----------------------|-----------------------|-------------------|------------------|------------------|--------------|
| 1         | <chem>COc1ccc(c2c1cccc2)C(=O)N/N=C\c3cc(cc(c3O)F)F</chem>   | 1.808               | 0.808               | 1.000               | 0.714            | 1.000                  | 1.714                 | 1.195           | 1.000                 | 2.195                 | 1.000             | 1.808            | -9.006           | 1.487.297    |
| 2         | <chem>COc1ccc(c2c1cccc2)C(=O)N/N=C\c3cc(cc(c3N)Cl)Cl</chem> | 1.799               | 0.800               | 0.999               | 0.705            | 1.000                  | 1.705                 | 1.202           | 1.000                 | 2.202                 | 1.000             | 1.800            | -9.004           | 1.467.565    |
| 3         | <chem>COc1ccc(c2c1cccc2)C(=O)N/N=C\c3cccc(c3O)F</chem>      | 1.794               | 0.794               | 1.000               | 0.698            | 1.000                  | 1.698                 | 1.210           | 1.000                 | 2.210                 | 1.000             | 1.794            | -9.006           | 1.452.219    |
| 4         | <chem>COc1ccc(c2c1cccc2)C(=O)N/N=C\c3ccc(cc3N)F</chem>      | 1.792               | 0.793               | 0.999               | 0.697            | 1.000                  | 1.696                 | 1.211           | 1.000                 | 2.211                 | 1.000             | 1.793            | -9.004           | 1.449.161    |
| 5         | <chem>COc1ccc(c2c1cccc2)C(=O)N/N=C\c3c(cccc3F)N</chem>      | 1.792               | 0.793               | 0.999               | 0.697            | 1.000                  | 1.697                 | 1.210           | 1.000                 | 2.209                 | 1.000             | 1.792            | -9.003           | 1.449.891    |
| 6         | <chem>Cc1ccc(c(c1)/C=N\NC(=O)c2ccc(c3c2cccc3)OC)O</chem>    | 1.792               | 0.792               | 1.000               | 0.695            | 1.000                  | 1.695                 | 1.212           | 1.000                 | 2.212                 | 1.000             | 1.792            | -9.006           | 1.446.425    |

|    |                                                               |       |       |       |       |       |       |       |       |       |       |       |        |           |
|----|---------------------------------------------------------------|-------|-------|-------|-------|-------|-------|-------|-------|-------|-------|-------|--------|-----------|
| 7  | <chem>Cc1ccc(c(c1)O)/C=N\NC(=O)c2ccc(c3c2cccc3)OC</chem>      | 1.791 | 0.791 | 1.000 | 0.695 | 1.000 | 1.695 | 1.212 | 1.000 | 2.212 | 1.000 | 1.791 | -9.006 | 1.446.114 |
| 8  | <chem>Cc1ccc(c(c1)N)/C=N\NC(=O)c2ccc(c3c2cccc3)OC</chem>      | 1.791 | 0.791 | 0.999 | 0.695 | 1.000 | 1.695 | 1.213 | 1.000 | 2.212 | 1.000 | 1.791 | -9.004 | 1.445.481 |
| 9  | <chem>Cc1cccc(c1/C=N\NC(=O)c2ccc(c3c2cccc3)OC)N</chem>        | 1.791 | 0.792 | 0.999 | 0.695 | 1.000 | 1.695 | 1.212 | 1.000 | 2.211 | 1.000 | 1.791 | -9.003 | 1.446.276 |
| 10 | <chem>COc1ccc(c2c1cccc2)C(=O)N/N=C\c3cc(ccc3O)Cl</chem>       | 1.789 | 0.789 | 1.000 | 0.693 | 1.000 | 1.693 | 1.213 | 1.000 | 2.213 | 1.000 | 1.789 | -9.006 | 1.440.966 |
| 11 | <chem>COc1ccc(c2c1cccc2)C(=O)N/N=C\c3ccc(cc3O)Cl</chem>       | 1.789 | 0.789 | 1.000 | 0.693 | 1.000 | 1.693 | 1.213 | 1.000 | 2.213 | 1.000 | 1.789 | -9.006 | 1.440.764 |
| 12 | <chem>COc1ccc(c2c1cccc2)C(=O)N/N=C\c3ccc(cc3N)Cl</chem>       | 1.788 | 0.789 | 0.999 | 0.692 | 1.000 | 1.692 | 1.214 | 1.000 | 2.214 | 1.000 | 1.789 | -9.004 | 1.440.051 |
| 13 | <chem>COc1ccc(c2c1cccc2)C(=O)N/N=C\c3c(cccc3Cl)O</chem>       | 1.788 | 0.789 | 0.999 | 0.693 | 0.999 | 1.693 | 1.213 | 0.999 | 2.212 | 0.999 | 1.789 | -9.001 | 1.442.019 |
| 14 | <chem>COc1ccc(c2c1cccc2)C(=O)N/N=C\c3cccc3O</chem>            | 1.779 | 0.779 | 1.000 | 0.681 | 1.000 | 1.681 | 1.227 | 1.000 | 2.227 | 1.000 | 1.779 | -9.006 | 1.414.887 |
| 15 | <chem>COc1ccc(c2c1cccc2)C(=O)N/N=C\c3cccc3N</chem>            | 1.778 | 0.779 | 0.999 | 0.681 | 1.000 | 1.680 | 1.228 | 1.000 | 2.228 | 1.000 | 1.779 | -9.003 | 1.414.319 |
| 16 | <chem>COc1ccc(c2c1cccc2)C(=O)N/N=C\c3cc(ccc3O)C(F)(F)F</chem> | 1.762 | 0.762 | 1.000 | 0.709 | 1.000 | 1.709 | 1.109 | 1.000 | 2.109 | 1.000 | 1.762 | -9.006 | 1.480.253 |
| 17 | <chem>COc1ccc(c2c1cccc2)C(=O)N/N=C\c3cc(ccc3OC)F</chem>       | 1.694 | 0.805 | 0.889 | 0.712 | 0.894 | 1.605 | 1.196 | 0.994 | 2.189 | 0.889 | 1.694 | -8.006 | 1.481.889 |
| 18 | <chem>Cc1ccc(c(c1)/C=N\NC(=O)c2ccc(c3c2cccc3)OC)OC</chem>     | 1.693 | 0.804 | 0.889 | 0.710 | 0.894 | 1.604 | 1.197 | 0.994 | 2.191 | 0.889 | 1.693 | -8.006 | 1.478.234 |
| 19 | <chem>COc1cccc(c1/C=N\NC(=O)c2ccc(c3c2cccc3)OC)Cl</chem>      | 1.690 | 0.802 | 0.888 | 0.708 | 0.893 | 1.601 | 1.198 | 0.993 | 2.192 | 0.889 | 1.690 | -8.002 | 1.473.642 |
| 20 | <chem>COc1cccc(c1O)/C=N\NC(=O)c2ccc(c3c2cccc3)OC</chem>       | 1.688 | 0.788 | 0.900 | 0.703 | 0.994 | 1.697 | 1.180 | 0.905 | 2.085 | 1.000 | 1.788 | -9.006 | 1.464.016 |
| 21 | <chem>COc1ccc(c2c1cccc2)C(=O)N/N=C\c3cc(ccc3O)Br</chem>       | 1.687 | 0.787 | 0.900 | 0.691 | 0.994 | 1.686 | 1.214 | 0.905 | 2.118 | 1.000 | 1.787 | -9.006 | 1.437.114 |

|    |                                                                |       |       |       |       |       |       |       |       |       |       |       |        |           |
|----|----------------------------------------------------------------|-------|-------|-------|-------|-------|-------|-------|-------|-------|-------|-------|--------|-----------|
| 22 | <chem>COc1ccc(c(c1)O)/C=N\NC(=O)c2ccc(c3c2cccc3)OC</chem>      | 1.686 | 0.786 | 0.900 | 0.702 | 0.994 | 1.696 | 1.180 | 0.905 | 2.085 | 1.000 | 1.786 | -9.006 | 1.461.704 |
| 23 | <chem>COc1ccc(c(c1)/[CH:1]=N\NC(=O)c2ccc(c3c2cccc3)OC)N</chem> | 1.685 | 0.786 | 0.899 | 0.701 | 0.994 | 1.696 | 1.181 | 0.904 | 2.085 | 1.000 | 1.786 | -9.003 | 1.460.769 |
| 24 | <chem>COc1ccc(c2c1cccc2)C(=O)N/N=C\c3cccc(c3O)C#N</chem>       | 1.684 | 0.784 | 0.900 | 0.701 | 0.994 | 1.696 | 1.177 | 0.904 | 2.082 | 1.000 | 1.784 | -9.006 | 1.460.220 |
| 25 | <chem>COc1ccc(c2c1cccc2)C(=O)N/N=C\c3cccc(cc3O)C#N</chem>      | 1.682 | 0.782 | 0.900 | 0.700 | 0.994 | 1.694 | 1.177 | 0.905 | 2.081 | 1.000 | 1.782 | -9.006 | 1.457.275 |
| 26 | <chem>COc1cccc1/[CH:1]=N\NC(=O)c2ccc(c3c2cccc3)OC</chem>       | 1.680 | 0.791 | 0.889 | 0.696 | 0.894 | 1.589 | 1.211 | 0.994 | 2.205 | 0.889 | 1.680 | -8.006 | 1.446.876 |
| 27 | <chem>COc1ccc(c2c1cccc2)C(=O)N/N=C\c3ccc4cccc4c3O</chem>       | 1.680 | 0.780 | 0.900 | 0.721 | 0.994 | 1.715 | 1.118 | 0.904 | 2.023 | 1.000 | 1.780 | -9.007 | 1.505.089 |
| 28 | <chem>COc1ccc(c2c1cccc2)C(=O)N/N=C\c3c4cccc4ccc3O</chem>       | 1.679 | 0.782 | 0.897 | 0.722 | 0.993 | 1.715 | 1.119 | 0.903 | 2.022 | 0.999 | 1.781 | -8.995 | 1.507.083 |
| 29 | <chem>CNc1cccc1/C=N\NC(=O)c2ccc(c3c2cccc3)OC</chem>            | 1.679 | 0.790 | 0.889 | 0.694 | 0.894 | 1.588 | 1.212 | 0.994 | 2.206 | 0.889 | 1.679 | -8.004 | 1.444.119 |
| 30 | <chem>COc1ccc(c2c1cccc2)C(=O)N/N=C\c3cncnc3N</chem>            | 1.677 | 0.778 | 0.899 | 0.681 | 0.994 | 1.675 | 1.224 | 0.904 | 2.128 | 0.999 | 1.777 | -9.000 | 1.415.080 |
| 31 | <chem>COc1ccc(c2c1cccc2)C(=O)N/N=C\c3c(cccn3)O</chem>          | 1.677 | 0.778 | 0.899 | 0.682 | 0.994 | 1.676 | 1.222 | 0.904 | 2.126 | 1.000 | 1.777 | -9.002 | 1.416.367 |
| 32 | <chem>COc1ccc(c2c1cccc2)C(=O)N/N=C\c3cccc(c3O)CC=C</chem>      | 1.673 | 0.773 | 0.900 | 0.702 | 0.994 | 1.697 | 1.150 | 0.905 | 2.055 | 1.000 | 1.773 | -9.006 | 1.463.787 |
| 33 | <chem>CCOc1ccc(c(c1)O)/C=N\NC(=O)c2ccc(c3c2cccc3)OC</chem>     | 1.671 | 0.771 | 0.900 | 0.702 | 0.994 | 1.696 | 1.147 | 0.905 | 2.051 | 1.000 | 1.771 | -9.006 | 1.463.022 |
| 34 | <chem>COc1ccc(c2c1cccc2)C(=O)N/N=C\c3cccc3OC(F)F</chem>        | 1.664 | 0.775 | 0.889 | 0.706 | 0.894 | 1.599 | 1.146 | 0.994 | 2.139 | 0.889 | 1.664 | -8.006 | 1.470.955 |
| 35 | <chem>c1ccc2c(c1)c(ccc2O)C(=O)N/N=C\c3c(cccc3F)O</chem>        | 1.646 | 0.746 | 0.900 | 0.666 | 0.994 | 1.660 | 1.192 | 0.905 | 2.097 | 1.000 | 1.746 | -9.006 | 1.383.449 |
| 36 | <chem>COc1ccc(c2c1cccc2)C(=O)N/N=C\c3ccc(cc3N)c4cccs4</chem>   | 1.637 | 0.737 | 0.900 | 0.701 | 0.994 | 1.696 | 1.074 | 0.904 | 1.978 | 1.000 | 1.737 | -9.004 | 1.465.373 |

|    |                                                                            |       |       |       |       |       |       |       |       |       |       |       |        |           |
|----|----------------------------------------------------------------------------|-------|-------|-------|-------|-------|-------|-------|-------|-------|-------|-------|--------|-----------|
| 37 | <chem>c1ccc(c(c1)/C=N\NC(=O)e2ccc(c3c2cccc3)O)O</chem>                     | 1.632 | 0.732 | 0.900 | 0.649 | 0.994 | 1.644 | 1.210 | 0.905 | 2.115 | 1.000 | 1.732 | -9.006 | 1.347.464 |
| 38 | <chem>c1ccc(c(c1)/C=N\NC(=O)e2c3ccccc3e(cc2Cl)Cl)O</chem>                  | 1.629 | 0.742 | 0.888 | 0.659 | 0.893 | 1.552 | 1.204 | 0.993 | 2.197 | 0.888 | 1.630 | -8.000 | 1.368.459 |
| 39 | <chem>Cc1cc(c(cc1O)O)/C=N\NC(=O)e2ccc(c3c2cccc3)OC</chem>                  | 1.623 | 0.804 | 0.818 | 0.711 | 0.989 | 1.700 | 1.195 | 0.826 | 2.021 | 1.000 | 1.804 | -9.006 | 1.480.724 |
| 40 | <chem>c1ccc(c(c1)/C=N\NC(=O)e2ccc(c3c2cccc3)Cl)O</chem>                    | 1.622 | 0.733 | 0.889 | 0.648 | 0.894 | 1.542 | 1.219 | 0.994 | 2.213 | 0.889 | 1.622 | -8.006 | 1.344.099 |
| 41 | <chem>Cc1ccc(c2c1cccc2)C(=O)N/N=C\c3ccccc3O</chem>                         | 1.621 | 0.733 | 0.889 | 0.649 | 0.894 | 1.543 | 1.214 | 0.994 | 2.208 | 0.889 | 1.622 | -8.006 | 1.346.547 |
| 42 | <chem>CCc1cc(c(c(c1O)/[CH:1]=N\NC(=O)e2ccc(c3c2cccc3)OC)OC)Cl</chem>       | 1.618 | 0.801 | 0.818 | 0.733 | 0.989 | 1.722 | 1.131 | 0.825 | 1.956 | 1.000 | 1.800 | -9.003 | 1.530.718 |
| 43 | <chem>COc1ccc(c2c1cccc2)C(=O)N/N=[CH:1]\c3c(ccc(c3O)Br)O</chem><br>C       | 1.613 | 0.796 | 0.818 | 0.713 | 0.989 | 1.702 | 1.170 | 0.825 | 1.995 | 1.000 | 1.795 | -9.002 | 1.486.771 |
| 44 | <chem>COc1ccc(c2c1cccc2)C(=O)N/N=C\c3c(ccc(c3OC)Br)O</chem>                | 1.612 | 0.794 | 0.818 | 0.712 | 0.989 | 1.701 | 1.168 | 0.826 | 1.994 | 1.000 | 1.794 | -9.004 | 1.484.785 |
| 45 | <chem>COc1ccc(c2c1cccc2)C(=O)N/N=[CH:1]\c3ccc(cc3O)O</chem>                | 1.611 | 0.793 | 0.818 | 0.697 | 0.989 | 1.686 | 1.210 | 0.826 | 2.036 | 1.000 | 1.793 | -9.006 | 1.449.284 |
| 46 | <chem>COc1ccc(c2c1cccc2)C(=O)N/N=C\c3c(c(c(c(c3F)F)F)F)F</chem>            | 1.610 | 0.832 | 0.778 | 0.746 | 0.787 | 1.533 | 1.161 | 0.986 | 2.146 | 0.778 | 1.610 | -7.006 | 1.558.436 |
| 47 | <chem>COc1ccc(c2c1cccc2)C(=O)N/N=C\c3ccc(cc3N)N</chem>                     | 1.610 | 0.792 | 0.818 | 0.696 | 0.989 | 1.685 | 1.212 | 0.826 | 2.037 | 1.000 | 1.792 | -9.004 | 1.447.386 |
| 48 | <chem>COc1ccc(c2c1cccc2)C(=O)N/N=[CH:1]\c3cc(c(cc3O)[N+](=O)[O-])Cl</chem> | 1.603 | 0.786 | 0.817 | 0.719 | 0.989 | 1.708 | 1.134 | 0.825 | 1.958 | 1.000 | 1.786 | -9.006 | 1.500.936 |

|    |                                                                   |       |       |       |       |       |       |       |       |       |       |       |        |           |
|----|-------------------------------------------------------------------|-------|-------|-------|-------|-------|-------|-------|-------|-------|-------|-------|--------|-----------|
| 49 | <chem>c1ccc(c1)/C=N\NC(=O)c2ccccc2c3ccc(Cl)O</chem>               | 1.601 | 0.712 | 0.889 | 0.637 | 0.894 | 1.531 | 1.199 | 0.994 | 2.193 | 0.889 | 1.601 | -8.006 | 1.321.349 |
| 50 | <chem>Cc1ccc2ccccc2c1)C(=O)N/N=C\c3ccccc3O</chem>                 | 1.601 | 0.712 | 0.889 | 0.638 | 0.894 | 1.532 | 1.195 | 0.994 | 2.188 | 0.889 | 1.601 | -8.006 | 1.323.911 |
| 51 | <chem>COc1ccc(c2c1cccc2)C(=O)N/N=C\c3cnc4ccccc4c3O</chem>         | 1.600 | 0.782 | 0.818 | 0.723 | 0.989 | 1.712 | 1.117 | 0.826 | 1.943 | 1.000 | 1.783 | -9.009 | 1.509.773 |
| 52 | <chem>Cc1ccc2ccccc2c1C(=O)N/N=C\c3ccccc3O</chem>                  | 1.600 | 0.712 | 0.888 | 0.638 | 0.894 | 1.532 | 1.194 | 0.994 | 2.187 | 0.889 | 1.600 | -8.004 | 1.324.082 |
| 53 | <chem>COc1ccc(c2c1cccc2)C(=O)N/N=[CH:1]\c3cc(ccc3OC)Br</chem>     | 1.600 | 0.800 | 0.800 | 0.706 | 0.889 | 1.595 | 1.199 | 0.889 | 2.088 | 0.889 | 1.688 | -8.006 | 1.469.215 |
| 54 | <chem>COc1ccc(c1/C=N\NC(=O)c2ccc(c3c2ccccc3)OC)OC</chem>          | 1.599 | 0.799 | 0.800 | 0.717 | 0.889 | 1.606 | 1.167 | 0.889 | 2.056 | 0.889 | 1.688 | -8.005 | 1.495.062 |
| 55 | <chem>COc1ccc(c2c1cccc2)C(=O)N/N=C\c3c(cccc3O)[N+](=O)[O-]</chem> | 1.596 | 0.780 | 0.816 | 0.710 | 0.988 | 1.698 | 1.145 | 0.824 | 1.970 | 1.000 | 1.780 | -9.002 | 1.479.914 |
| 56 | <chem>c1ccc(c1)/C=N\NC(=O)c2ccc(c3c2ccccc3)C#N)O</chem>           | 1.594 | 0.752 | 0.843 | 0.667 | 0.915 | 1.582 | 1.201 | 0.915 | 2.116 | 0.915 | 1.666 | -8.239 | 1.386.865 |
| 57 | <chem>COc1ccc(c2c1cccc2)C(=O)N/N=C\c3cc(ccc3O)C(=O)N</chem>       | 1.594 | 0.776 | 0.818 | 0.706 | 0.989 | 1.695 | 1.146 | 0.826 | 1.972 | 1.000 | 1.776 | -9.006 | 1.471.798 |
| 58 | <chem>COc1ccc(c2c1cccc2)C(=O)N/N=C\c3ccc(cc3O)[N+](=O)[O-]</chem> | 1.593 | 0.776 | 0.817 | 0.707 | 0.989 | 1.696 | 1.143 | 0.825 | 1.968 | 1.000 | 1.776 | -9.006 | 1.475.087 |
| 59 | <chem>COc1ccc(c2c1cccc2)C(=O)N/N=C\c3ccc(cc3N)[N+](=O)[O-]</chem> | 1.593 | 0.776 | 0.817 | 0.707 | 0.989 | 1.696 | 1.144 | 0.824 | 1.968 | 1.000 | 1.776 | -9.004 | 1.474.464 |
| 60 | <chem>COc1ccc(c2c1cccc2)C(=O)N/N=C\c3cc(ccc3N)[N+](=O)[O-]</chem> | 1.592 | 0.775 | 0.817 | 0.707 | 0.989 | 1.695 | 1.143 | 0.824 | 1.968 | 1.000 | 1.775 | -9.003 | 1.473.673 |

|    |                                                  |       |       |       |       |       |       |       |       |       |       |       |        |           |
|----|--------------------------------------------------|-------|-------|-------|-------|-------|-------|-------|-------|-------|-------|-------|--------|-----------|
|    | -]                                               |       |       |       |       |       |       |       |       |       |       |       |        |           |
| 61 | c1ccc2c(c1)cccc2C(=O)N/N=C\c3ccccc3O             | 1.588 | 0.699 | 0.889 | 0.623 | 0.894 | 1.517 | 1.210 | 0.994 | 2.204 | 0.889 | 1.588 | -8.006 | 1.292.258 |
| 62 | CC(C)c1ccc(c(e1)/C=N\NC(=O)c2ccc(c3e2cccc3)OC)OC | 1.586 | 0.786 | 0.800 | 0.717 | 0.889 | 1.606 | 1.140 | 0.889 | 2.029 | 0.889 | 1.675 | -8.006 | 1.495.164 |
| 63 | Cc1ccc2cccc(c2n1)/C=N\NC(=O)c3ccc(c4e3cccc4)OC   | 1.586 | 0.786 | 0.800 | 0.724 | 0.889 | 1.613 | 1.122 | 0.889 | 2.011 | 0.889 | 1.675 | -8.008 | 1.511.991 |
| 64 | c1ccc(c(c1)/C=N\NC(=O)c2cccc3c2CCCC3)O           | 1.585 | 0.697 | 0.888 | 0.619 | 0.894 | 1.513 | 1.220 | 0.994 | 2.214 | 0.889 | 1.586 | -8.003 | 1.283.106 |
| 65 | COc1ccc(c2c1cccc2)C(=O)N/N=C\c3ccc(c(c3F)F)F     | 1.585 | 0.807 | 0.778 | 0.714 | 0.787 | 1.501 | 1.192 | 0.986 | 2.178 | 0.778 | 1.585 | -7.006 | 1.487.341 |
| 66 | COc1ccc(c2c1cccc2)C(=O)N/N=C\c3c(cc(c3F)F)F      | 1.584 | 0.806 | 0.778 | 0.713 | 0.787 | 1.500 | 1.193 | 0.986 | 2.178 | 0.778 | 1.584 | -7.006 | 1.485.822 |
| 67 | Cc1cc(cc(c1)/C=N\NC(=O)c2ccc(c3e2cccc3)OC)C)F    | 1.583 | 0.805 | 0.778 | 0.710 | 0.787 | 1.497 | 1.197 | 0.986 | 2.183 | 0.778 | 1.583 | -7.006 | 1.479.483 |
| 68 | CCc1ccc(c2c1cccc2)C(=O)N/N=C\c3ccccc3O           | 1.579 | 0.779 | 0.800 | 0.679 | 0.889 | 1.568 | 1.231 | 0.889 | 2.120 | 0.889 | 1.668 | -8.006 | 1.411.421 |
| 69 | CCc1ccc(c2c1cccc2)C(=O)N/N=C\c3ccccc3O           | 1.579 | 0.779 | 0.800 | 0.679 | 0.889 | 1.568 | 1.231 | 0.889 | 2.120 | 0.889 | 1.668 | -8.006 | 1.411.406 |
| 70 | COc1ccc(c2c1cccc2)C(=O)N/N=C\c3cc(cc(c3Cl)Cl)Cl  | 1.576 | 0.798 | 0.778 | 0.702 | 0.787 | 1.489 | 1.207 | 0.986 | 2.193 | 0.778 | 1.576 | -7.006 | 1.461.177 |
| 71 | Cc1c(cccc1F)/C=N\NC(=O)c2ccc(c3e2cccc3)OC        | 1.572 | 0.794 | 0.778 | 0.697 | 0.787 | 1.484 | 1.213 | 0.986 | 2.199 | 0.778 | 1.572 | -7.006 | 1.450.234 |
| 72 | COc1ccc(c2c1cccc2)C(=O)N/N=C\c3ccccc3N=O         | 1.572 | 0.794 | 0.778 | 0.698 | 0.787 | 1.484 | 1.210 | 0.986 | 2.196 | 0.778 | 1.572 | -7.006 | 1.451.507 |
| 73 | Cc1cc(ccc1)/C=N\NC(=O)c2ccc(c3e2cccc3)OC)F       | 1.571 | 0.793 | 0.778 | 0.696 | 0.787 | 1.483 | 1.213 | 0.986 | 2.199 | 0.778 | 1.571 | -7.006 | 1.447.803 |
| 74 | COc1ccc(c2c1cccc2)C(=O)N/N=C\c3c(cccc3F)F        | 1.570 | 0.793 | 0.778 | 0.697 | 0.787 | 1.484 | 1.208 | 0.986 | 2.194 | 0.778 | 1.570 | -7.006 | 1.451.036 |

|    |                                                               |       |       |       |       |       |       |       |       |       |       |       |        |           |
|----|---------------------------------------------------------------|-------|-------|-------|-------|-------|-------|-------|-------|-------|-------|-------|--------|-----------|
| 75 | <chem>COc1ccc(c2c1cccc2)C(=O)N/N=C\c3ccc(cc3F)F</chem>        | 1.570 | 0.792 | 0.778 | 0.697 | 0.787 | 1.484 | 1.209 | 0.986 | 2.195 | 0.778 | 1.570 | -7.006 | 1.449.876 |
| 76 | <chem>COc1ccc(c2c1cccc2)C(=O)N/N=C\c3c(cccc3Cl)F</chem>       | 1.569 | 0.792 | 0.778 | 0.695 | 0.787 | 1.481 | 1.214 | 0.986 | 2.200 | 0.778 | 1.569 | -7.006 | 1.444.632 |
| 77 | <chem>Cc1ccc(c(c1)C)/C=N\NC(=O)c2ccc(c3c2cccc3)OC</chem>      | 1.569 | 0.791 | 0.778 | 0.694 | 0.787 | 1.481 | 1.214 | 0.986 | 2.200 | 0.778 | 1.569 | -7.006 | 1.444.083 |
| 78 | <chem>Cc1cccc(c1/C=N\NC(=O)c2ccc(c3c2cccc3)OC)Cl</chem>       | 1.568 | 0.790 | 0.778 | 0.693 | 0.787 | 1.479 | 1.217 | 0.986 | 2.202 | 0.778 | 1.568 | -7.006 | 1.440.541 |
| 79 | <chem>COc1ccc(c2c1cccc2)C(=O)N/N=C\c3cccc(c3F)Cl</chem>       | 1.568 | 0.790 | 0.778 | 0.694 | 0.787 | 1.480 | 1.213 | 0.986 | 2.199 | 0.778 | 1.568 | -7.006 | 1.442.869 |
| 80 | <chem>Cc1cc(ccc1/C=N\NC(=O)c2ccc(c3c2cccc3)OC)Cl</chem>       | 1.567 | 0.789 | 0.778 | 0.692 | 0.787 | 1.478 | 1.216 | 0.986 | 2.202 | 0.778 | 1.567 | -7.006 | 1.438.738 |
| 81 | <chem>Cc1cc(cc(c1/C=N\NC(=O)c2ccc(c3c2cccc3)OC)C)N(C)C</chem> | 1.566 | 0.788 | 0.778 | 0.718 | 0.787 | 1.505 | 1.140 | 0.986 | 2.126 | 0.778 | 1.566 | -7.006 | 1.498.975 |
| 82 | <chem>COc1ccc(c2c1cccc2)C(=O)N/N=C\c3ccc(cc3Cl)Cl</chem>      | 1.566 | 0.788 | 0.778 | 0.690 | 0.787 | 1.477 | 1.219 | 0.986 | 2.205 | 0.778 | 1.566 | -7.006 | 1.434.505 |
| 83 | <chem>COc1ccc(c2c1cccc2)C(=O)N/N=C\c3cc(ccc3Cl)Cl</chem>      | 1.565 | 0.788 | 0.778 | 0.690 | 0.787 | 1.477 | 1.219 | 0.986 | 2.205 | 0.778 | 1.566 | -7.006 | 1.434.495 |
| 84 | <chem>COc1ccc(c2c1cccc2)C(=O)N/N=C\c3c(cccc3Cl)Cl</chem>      | 1.565 | 0.788 | 0.778 | 0.690 | 0.787 | 1.477 | 1.218 | 0.986 | 2.204 | 0.778 | 1.565 | -7.005 | 1.434.904 |
| 85 | <chem>COc1ccc(c2c1cccc2)C(=O)N/N=[CH:1]\c3cccc3OCC#N</chem>   | 1.564 | 0.764 | 0.800 | 0.698 | 0.889 | 1.587 | 1.141 | 0.889 | 2.030 | 0.889 | 1.653 | -8.006 | 1.455.608 |
| 86 | <chem>COc1ccc(c2c1cccc2)C(=O)N/N=C\c3cccc3N=[N+]=[N-]</chem>  | 1.563 | 0.785 | 0.778 | 0.703 | 0.787 | 1.489 | 1.176 | 0.986 | 2.162 | 0.778 | 1.563 | -7.006 | 1.463.252 |
| 87 | <chem>COc1ccc(c2c1cccc2)C(=O)N/N=C\c3cccc3C(F)(F)F</chem>     | 1.562 | 0.785 | 0.777 | 0.713 | 0.786 | 1.499 | 1.148 | 0.985 | 2.134 | 0.778 | 1.562 | -7.003 | 1.486.099 |
| 88 | <chem>COc1ccc(c2c1cccc2)C(=O)N/N=C\c3cccc3F</chem>            | 1.557 | 0.779 | 0.778 | 0.681 | 0.787 | 1.468 | 1.226 | 0.986 | 2.212 | 0.778 | 1.557 | -7.006 | 1.415.115 |
| 89 | <chem>COc1ccc(c2c1cccc2)C(=O)N/N=C\c3cccc3Cl</chem>           | 1.556 | 0.778 | 0.778 | 0.678 | 0.787 | 1.465 | 1.233 | 0.986 | 2.219 | 0.778 | 1.556 | -7.006 | 1.408.861 |



|     |                                                                       |       |       |       |       |       |       |       |       |       |       |       |        |           |
|-----|-----------------------------------------------------------------------|-------|-------|-------|-------|-------|-------|-------|-------|-------|-------|-------|--------|-----------|
| 90  | <chem>COc1ccc(c2c1cccc2)C(=O)N/N=C\c3c(ccc(c3O)Br)O</chem>            | 1.551 | 0.802 | 0.750 | 0.708 | 0.983 | 1.691 | 1.198 | 0.759 | 1.957 | 1.000 | 1.801 | -9.003 | 1.473.928 |
| 91  | <chem>COc1ccc(c2c1cccc2)C(=O)N/N=C\c3c(c4ccccc4o3)O</chem>            | 1.550 | 0.784 | 0.766 | 0.715 | 0.954 | 1.670 | 1.139 | 0.795 | 1.935 | 0.965 | 1.749 | -8.691 | 1.492.429 |
| 92  | <chem>COc1ccc(c2c1cccc2)C(=O)N/N=C\c3cc(c(cc3O)O)Br</chem>            | 1.550 | 0.800 | 0.750 | 0.707 | 0.984 | 1.690 | 1.198 | 0.760 | 1.957 | 1.000 | 1.800 | -9.006 | 1.471.314 |
| 93  | <chem>COc1ccc(c2c1cccc2)C(=O)N/N=C\[C@H](c3ccccc3)O</chem>            | 1.546 | 0.745 | 0.802 | 0.671 | 0.890 | 1.561 | 1.174 | 0.890 | 2.064 | 0.890 | 1.635 | -8.015 | 1.395.109 |
| 94  | <chem>COc1ccc(c2c1cccc2)C(=O)N/N=C\c3c(c4ccccc4o3)N</chem>            | 1.545 | 0.784 | 0.761 | 0.715 | 0.950 | 1.666 | 1.140 | 0.792 | 1.932 | 0.961 | 1.745 | -8.654 | 1.492.425 |
| 95  | <chem>Cc1cc(cc(c1/C=N\NC(=O)c2ccc(c3c2cccc3)OC)OC)O</chem>            | 1.544 | 0.817 | 0.727 | 0.726 | 0.884 | 1.610 | 1.182 | 0.804 | 1.986 | 0.889 | 1.706 | -8.005 | 1.513.272 |
| 96  | <chem>COc1ccc(c2c1cccc2)C(=O)N/N=C\c3cc(ccc3F)C(F)(F)F</chem>         | 1.540 | 0.762 | 0.778 | 0.709 | 0.787 | 1.496 | 1.109 | 0.986 | 2.095 | 0.778 | 1.540 | -7.006 | 1.480.886 |
| 97  | <chem>COc1ccc(c2c1cccc2)C(=O)N/N=C\c3ccc(c(c3)CN=O)F</chem>           | 1.540 | 0.762 | 0.778 | 0.697 | 0.787 | 1.484 | 1.138 | 0.986 | 2.124 | 0.778 | 1.540 | -7.006 | 1.453.575 |
| 98  | <chem>c1ccc(c(c1)/C=N\NC(=O)c2ccc(cc2)OC(F)(F)F)O</chem>              | 1.539 | 0.655 | 0.884 | 0.606 | 0.891 | 1.497 | 1.140 | 0.991 | 2.130 | 0.886 | 1.541 | -7.978 | 1.258.597 |
| 99  | <chem>COc1ccc(c2c1cccc2)C(=O)N/N=C\[C@H](c3ccc(cc3)F)O</chem>         | 1.538 | 0.736 | 0.802 | 0.675 | 0.890 | 1.565 | 1.140 | 0.890 | 2.030 | 0.890 | 1.626 | -8.015 | 1.405.934 |
| 100 | <chem>Cc1ccc(c(c1/C=N\NC(=O)c2ccc(c3c2cccc3)OC)OC)O</chem>            | 1.537 | 0.810 | 0.727 | 0.723 | 0.884 | 1.607 | 1.176 | 0.804 | 1.980 | 0.889 | 1.699 | -8.005 | 1.506.821 |
| 101 | <chem>COc1ccc(c2c1cccc2)C(=O)N/N=C\c3ccccc3C#N</chem>                 | 1.537 | 0.788 | 0.749 | 0.694 | 0.814 | 1.507 | 1.208 | 0.905 | 2.112 | 0.809 | 1.597 | -7.288 | 1.442.824 |
| 102 | <chem>COc1ccc(c2c1cccc2)C(=O)N/N=C\c3cc(cc(c3O)Br)[N+](=O)[O-]</chem> | 1.534 | 0.785 | 0.749 | 0.718 | 0.983 | 1.702 | 1.134 | 0.759 | 1.893 | 1.000 | 1.785 | -9.005 | 1.498.929 |
| 103 | <chem>COc1ccc(c2c1cccc2)C(=O)N/N=C\c3ccccc3C=O</chem>                 | 1.533 | 0.788 | 0.745 | 0.694 | 0.811 | 1.505 | 1.208 | 0.902 | 2.109 | 0.807 | 1.594 | -7.266 | 1.443.097 |

|     |                                                              |       |       |       |       |       |       |       |       |       |       |       |        |           |
|-----|--------------------------------------------------------------|-------|-------|-------|-------|-------|-------|-------|-------|-------|-------|-------|--------|-----------|
| 104 | <chem>COc1ccc(c2c1cccc2)C(=O)N/N=C\c3c(ccc(c3OC)Br)OC</chem> | 1.533 | 0.805 | 0.727 | 0.726 | 0.884 | 1.610 | 1.156 | 0.804 | 1.960 | 0.889 | 1.694 | -8.005 | 1.515.673 |
| 105 | <chem>COc1ccc(c2c1cccc2)C(=O)N/N=C\c3cc(c(cc3OC)OC)OC</chem> | 1.532 | 0.805 | 0.727 | 0.738 | 0.884 | 1.622 | 1.128 | 0.804 | 1.932 | 0.889 | 1.694 | -8.006 | 1.540.909 |
| 106 | <chem>COc1ccc(c2c1cccc2)C(=O)N/N=C\c3c(ccs3)Cl</chem>        | 1.529 | 0.754 | 0.775 | 0.654 | 0.785 | 1.439 | 1.253 | 0.984 | 2.236 | 0.776 | 1.530 | -6.991 | 1.357.469 |
| 107 | <chem>CN(C)c1cccc1/C=N\NC(=O)c2ccc(c3c2cccc3)OC</chem>       | 1.528 | 0.751 | 0.778 | 0.683 | 0.786 | 1.469 | 1.153 | 0.986 | 2.139 | 0.778 | 1.529 | -7.004 | 1.421.844 |
| 108 | <chem>COc1ccc(c2c1cccc2)C(=O)N/N=C\C3=CCCC3</chem>           | 1.528 | 0.750 | 0.778 | 0.654 | 0.787 | 1.441 | 1.243 | 0.986 | 2.228 | 0.778 | 1.528 | -7.006 | 1.357.867 |
| 109 | <chem>c1ccc(c(c1)/C=N\NC(=O)c2ccnc3c2cccc3)O</chem>          | 1.528 | 0.698 | 0.829 | 0.624 | 0.907 | 1.531 | 1.205 | 0.907 | 2.112 | 0.907 | 1.605 | -8.166 | 1.294.307 |
| 110 | <chem>c1ccc(c(c1)/C=N\NC(=O)c2ccnc3c2cccc3)O</chem>          | 1.527 | 0.698 | 0.829 | 0.624 | 0.907 | 1.531 | 1.205 | 0.907 | 2.112 | 0.907 | 1.605 | -8.166 | 1.294.200 |
| 111 | <chem>COc1ccc(c2c1cccc2)C(=O)N/N=C\c3ccc4c3OCO4</chem>       | 1.527 | 0.801 | 0.726 | 0.715 | 0.884 | 1.599 | 1.177 | 0.802 | 1.979 | 0.889 | 1.690 | -8.007 | 1.490.079 |
| 112 | <chem>COc1ccc(c2c1cccc2)C(=O)N/N=C\c3ccc(cc3O)C(=O)O</chem>  | 1.525 | 0.775 | 0.749 | 0.706 | 0.984 | 1.690 | 1.145 | 0.759 | 1.904 | 1.000 | 1.775 | -9.006 | 1.472.222 |
| 113 | <chem>COc1ccc(c2c1cccc2)C(=O)N/N=C\c3cc(ccc3OC)CO</chem>     | 1.525 | 0.797 | 0.727 | 0.715 | 0.884 | 1.599 | 1.169 | 0.804 | 1.973 | 0.889 | 1.686 | -8.006 | 1.490.107 |
| 114 | <chem>Cn1cccc1/C=N\NC(=O)c2ccc(c3c2cccc3)OC</chem>           | 1.521 | 0.750 | 0.772 | 0.658 | 0.783 | 1.441 | 1.228 | 0.981 | 2.209 | 0.774 | 1.524 | -6.974 | 1.366.569 |
| 115 | <chem>Cc1cc2cccc(c2nc1)C(=O)N/N=C\c3cccc3O</chem>            | 1.510 | 0.711 | 0.799 | 0.639 | 0.888 | 1.527 | 1.190 | 0.888 | 2.078 | 0.888 | 1.600 | -8.000 | 1.326.223 |
| 116 | <chem>COc1ccc2cccc(c2c1)C(=O)N/N=C\c3cccc3O</chem>           | 1.510 | 0.710 | 0.800 | 0.646 | 0.889 | 1.535 | 1.163 | 0.889 | 2.052 | 0.889 | 1.599 | -8.006 | 1.341.661 |
| 117 | <chem>COc1ccc(c2c1cccc2)C(=O)N/N=C\c3ccc4c3OCCCO4</chem>     | 1.509 | 0.785 | 0.724 | 0.722 | 0.882 | 1.604 | 1.124 | 0.802 | 1.926 | 0.887 | 1.672 | -7.987 | 1.507.753 |
| 118 | <chem>COc1ccc2c(c1)cccc2C(=O)N/N=C\c3cccc3O</chem>           | 1.508 | 0.708 | 0.800 | 0.645 | 0.889 | 1.533 | 1.161 | 0.889 | 2.050 | 0.889 | 1.597 | -8.006 | 1.339.324 |

|     |                                                                 |       |       |       |       |       |       |       |       |       |       |       |        |           |
|-----|-----------------------------------------------------------------|-------|-------|-------|-------|-------|-------|-------|-------|-------|-------|-------|--------|-----------|
| 119 | <chem>COc1ccc2ccccc2c1C(=O)N/N=C\c3ccccc3O</chem>               | 1.508 | 0.708 | 0.800 | 0.645 | 0.889 | 1.534 | 1.160 | 0.889 | 2.049 | 0.889 | 1.597 | -8.005 | 1.340.329 |
| 120 | <chem>COc1ccc2ccccc2c1C(=O)N/N=C\c3ccccc3O</chem>               | 1.508 | 0.708 | 0.800 | 0.645 | 0.889 | 1.534 | 1.160 | 0.889 | 2.049 | 0.889 | 1.597 | -8.005 | 1.340.317 |
| 121 | <chem>CCc1ccc2cccc(e2c1)C(=O)N/N=C\c3ccccc3O</chem>             | 1.507 | 0.707 | 0.800 | 0.642 | 0.889 | 1.531 | 1.165 | 0.889 | 2.054 | 0.889 | 1.596 | -8.006 | 1.334.563 |
| 122 | <chem>Cc1ccc2ccccc2c1/C=N\NC(=O)c3ccc(c4c3ccccc4)OC</chem>      | 1.506 | 0.806 | 0.700 | 0.733 | 0.782 | 1.516 | 1.141 | 0.869 | 2.010 | 0.778 | 1.584 | -7.008 | 1.530.882 |
| 123 | <chem>COCc1ccccc1/C=N\NC(=O)c2ccc(c3c2ccccc3)OC</chem>          | 1.502 | 0.780 | 0.722 | 0.697 | 0.796 | 1.494 | 1.180 | 0.885 | 2.065 | 0.792 | 1.572 | -7.131 | 1.451.900 |
| 124 | <chem>Cc1ccccc1/C=N\NC(=O)c2ccc(c3c2ccccc3)OC</chem>            | 1.501 | 0.764 | 0.737 | 0.674 | 0.806 | 1.480 | 1.212 | 0.896 | 2.108 | 0.801 | 1.565 | -7.218 | 1.400.353 |
| 125 | <chem>COc1ccc(c2c1ccccc2)C(=O)N/N=C\c3ccccc3[N+](=O)[O-]</chem> | 1.499 | 0.798 | 0.702 | 0.709 | 0.825 | 1.535 | 1.186 | 0.824 | 2.010 | 0.825 | 1.623 | -7.434 | 1.477.195 |
| 126 | <chem>COc1ccc(c2c1ccccc2)C(=O)N/N=C\c3c(cccn3)Cl</chem>         | 1.499 | 0.762 | 0.737 | 0.671 | 0.806 | 1.477 | 1.215 | 0.896 | 2.110 | 0.801 | 1.563 | -7.218 | 1.395.101 |
| 127 | <chem>COc1ccc(c2c1ccccc2)C(=O)N/N=C\c3ccccc3</chem>             | 1.499 | 0.724 | 0.775 | 0.633 | 0.785 | 1.417 | 1.249 | 0.984 | 2.233 | 0.776 | 1.500 | -6.990 | 1.310.932 |
| 128 | <chem>c1ccc(c(c1)/C=N\NC(=O)c2ccccc2ccnc3)O</chem>              | 1.498 | 0.698 | 0.800 | 0.623 | 0.889 | 1.512 | 1.206 | 0.889 | 2.095 | 0.889 | 1.587 | -8.006 | 1.292.711 |
| 129 | <chem>c1ccc(c(c1)/C=N\NC(=O)c2ccccc2cccn3)O</chem>              | 1.498 | 0.697 | 0.800 | 0.624 | 0.889 | 1.513 | 1.204 | 0.889 | 2.093 | 0.889 | 1.586 | -8.006 | 1.293.304 |
| 130 | <chem>c1ccc2c(c1)ccnc2C(=O)N/N=C\c3ccccc3O</chem>               | 1.498 | 0.698 | 0.800 | 0.624 | 0.889 | 1.512 | 1.205 | 0.889 | 2.094 | 0.889 | 1.587 | -8.004 | 1.293.367 |
| 131 | <chem>Cc1cc(cc(c1)/C=N\NC(=O)c2ccc(c3c2ccccc3)OC)C)NC</chem>    | 1.497 | 0.796 | 0.700 | 0.714 | 0.782 | 1.496 | 1.169 | 0.870 | 2.039 | 0.778 | 1.574 | -7.006 | 1.488.278 |
| 132 | <chem>c1ccc(c(c1)/C=N\NC(=O)c2ccccc2nccc3)O</chem>              | 1.496 | 0.697 | 0.799 | 0.624 | 0.888 | 1.512 | 1.203 | 0.888 | 2.092 | 0.888 | 1.585 | -8.000 | 1.293.437 |
| 133 | <chem>COc1ccc(c2c1ccccc2)C(=O)N/N=C\c3ccccc3[S@@](=O)C</chem>   | 1.491 | 0.777 | 0.714 | 0.692 | 0.791 | 1.483 | 1.189 | 0.880 | 2.068 | 0.787 | 1.564 | -7.087 | 1.439.947 |

|     |                                                                 |       |       |       |       |       |       |       |       |       |       |       |        |           |
|-----|-----------------------------------------------------------------|-------|-------|-------|-------|-------|-------|-------|-------|-------|-------|-------|--------|-----------|
| 134 | <chem>COc1ccc(c2c1cccc2)C(=O)N/N=C\c3cccc3C(=O)N</chem>         | 1.489 | 0.797 | 0.692 | 0.707 | 0.818 | 1.525 | 1.189 | 0.818 | 2.006 | 0.818 | 1.615 | -7.366 | 1.473.286 |
| 135 | <chem>COc1ccc(c2c1cccc2)C(=O)N/N=C\c3cc(ccc3F)Br</chem>         | 1.487 | 0.787 | 0.700 | 0.691 | 0.782 | 1.473 | 1.213 | 0.870 | 2.083 | 0.778 | 1.565 | -7.006 | 1.437.379 |
| 136 | <chem>COc1ccc(c2c1cccc2)C(=O)N/N=C\c3ccccc3</chem>              | 1.484 | 0.747 | 0.737 | 0.657 | 0.806 | 1.463 | 1.225 | 0.896 | 2.121 | 0.801 | 1.549 | -7.217 | 1.364.286 |
| 137 | <chem>COc1ccc(c2c1cccc2)C(=O)N/N=C\c3cc(ccc3O)c4cc[nH]n4</chem> | 1.483 | 0.733 | 0.750 | 0.705 | 0.984 | 1.688 | 1.058 | 0.760 | 1.817 | 1.000 | 1.733 | -9.006 | 1.473.554 |
| 138 | <chem>CCNc1cc(c(c1)C)/C=N\NC(=O)c2ccc(c3c2cccc3)OC)C</chem>     | 1.483 | 0.783 | 0.700 | 0.715 | 0.782 | 1.497 | 1.138 | 0.870 | 2.008 | 0.778 | 1.561 | -7.005 | 1.491.369 |
| 139 | <chem>Cc1cccc(c1/C=N\NC(=O)c2ccc(c3c2cccc3)OC)CO</chem>         | 1.482 | 0.795 | 0.687 | 0.705 | 0.815 | 1.519 | 1.191 | 0.815 | 2.006 | 0.815 | 1.609 | -7.337 | 1.467.187 |
| 140 | <chem>Cc1c(c(n1)C)C)/C=N\NC(=O)c2ccc(c3c2cccc3)OC</chem>        | 1.482 | 0.786 | 0.696 | 0.694 | 0.779 | 1.473 | 1.204 | 0.866 | 2.071 | 0.775 | 1.561 | -6.980 | 1.443.010 |
| 141 | <chem>COc1ccc(c2c1cccc2)C(=O)N/N=C\c3cc(ccc3O)c4c[nH]nc4</chem> | 1.481 | 0.731 | 0.750 | 0.703 | 0.984 | 1.687 | 1.056 | 0.760 | 1.816 | 1.000 | 1.731 | -9.006 | 1.470.218 |
| 142 | <chem>Cc1c(ccen1)/C=N\NC(=O)c2ccc(c3c2cccc3)OC</chem>           | 1.479 | 0.779 | 0.701 | 0.681 | 0.783 | 1.463 | 1.226 | 0.870 | 2.096 | 0.778 | 1.557 | -7.010 | 1.414.695 |
| 143 | <chem>COc1ccc(c2c1cccc2)C(=O)N/N=C\c3cc(c(c3)Cl)OC)Cl</chem>    | 1.479 | 0.779 | 0.700 | 0.703 | 0.782 | 1.485 | 1.161 | 0.870 | 2.031 | 0.778 | 1.557 | -7.006 | 1.464.697 |
| 144 | <chem>COc1ccc(c2c1cccc2)C(=O)N/N=C\c3c(cc(cc3OC)O)OC</chem>     | 1.479 | 0.812 | 0.667 | 0.733 | 0.879 | 1.612 | 1.154 | 0.734 | 1.888 | 0.889 | 1.701 | -8.005 | 1.529.063 |
| 145 | <chem>Cc1enccc1/C=N\NC(=O)c2ccc(c3c2cccc3)OC</chem>             | 1.478 | 0.778 | 0.700 | 0.681 | 0.782 | 1.463 | 1.226 | 0.870 | 2.096 | 0.778 | 1.556 | -7.006 | 1.414.279 |
| 146 | <chem>COc1ccc(c2c1cccc2)C(=O)N/N=C\c3ccncc3Cl</chem>            | 1.477 | 0.777 | 0.700 | 0.679 | 0.782 | 1.461 | 1.230 | 0.870 | 2.099 | 0.778 | 1.555 | -7.006 | 1.410.213 |
| 147 | <chem>COc1ccc(c2c1cccc2)C(=O)N/N=C\c3enccc3Cl</chem>            | 1.477 | 0.777 | 0.700 | 0.679 | 0.782 | 1.461 | 1.230 | 0.870 | 2.099 | 0.778 | 1.555 | -7.005 | 1.410.168 |
| 148 | <chem>COc1ccc(c2c1cccc2)C(=O)N/N=[CH:1]\c3cccc3SC</chem>        | 1.477 | 0.777 | 0.700 | 0.684 | 0.782 | 1.466 | 1.213 | 0.870 | 2.082 | 0.778 | 1.555 | -7.006 | 1.421.385 |

|     |                                                               |       |       |       |       |       |       |       |       |       |       |       |        |           |
|-----|---------------------------------------------------------------|-------|-------|-------|-------|-------|-------|-------|-------|-------|-------|-------|--------|-----------|
| 149 | <chem>COc1ccc(c(c1)OC)C(=O)N/N=C\c2ccccc2O</chem>             | 1.476 | 0.678 | 0.798 | 0.609 | 0.888 | 1.497 | 1.201 | 0.888 | 2.089 | 0.887 | 1.566 | -7.993 | 1.262.233 |
| 150 | <chem>COc1ccc(c2c1cccc2)C(=O)N/N=C\c3ccccc3Br</chem>          | 1.476 | 0.776 | 0.700 | 0.677 | 0.782 | 1.459 | 1.234 | 0.870 | 2.104 | 0.778 | 1.554 | -7.006 | 1.405.404 |
| 151 | <chem>COc1ccc(c2c1cccc2)C(=O)N/N=C\c3cc4c(cc3OC)OCO4</chem>   | 1.475 | 0.809 | 0.667 | 0.736 | 0.880 | 1.617 | 1.138 | 0.733 | 1.871 | 0.890 | 1.699 | -8.019 | 1.537.759 |
| 152 | <chem>COc1ccc(c2c1cccc2)C(=O)N/N=C\c3ccc(c(c3)F)OC</chem>     | 1.475 | 0.775 | 0.700 | 0.697 | 0.782 | 1.479 | 1.171 | 0.870 | 2.040 | 0.778 | 1.553 | -7.006 | 1.450.468 |
| 153 | <chem>COc1ccc(c2c1cccc2)C(=O)N/N=C\c3c(c4ccccc4s3)Cl</chem>   | 1.472 | 0.773 | 0.699 | 0.702 | 0.782 | 1.484 | 1.151 | 0.868 | 2.018 | 0.777 | 1.551 | -7.001 | 1.463.324 |
| 154 | <chem>C[C@@H](c1ccccc1/C=N\NC(=O)c2ccc(c3c2ccccc3)OC)O</chem> | 1.471 | 0.792 | 0.680 | 0.703 | 0.809 | 1.512 | 1.190 | 0.809 | 1.999 | 0.809 | 1.601 | -7.289 | 1.463.403 |
| 155 | <chem>COc1ccc(cc1)C(=O)N/N=C\c2ccccc2O</chem>                 | 1.469 | 0.585 | 0.883 | 0.541 | 0.891 | 1.432 | 1.164 | 0.991 | 2.154 | 0.886 | 1.471 | -7.977 | 1.118.397 |
| 156 | <chem>CCn1c(c(cn1)/C=N\NC(=O)c2ccc(c3c2ccccc3)OC)C</chem>     | 1.468 | 0.772 | 0.696 | 0.686 | 0.779 | 1.465 | 1.194 | 0.866 | 2.061 | 0.775 | 1.547 | -6.980 | 1.427.163 |
| 157 | <chem>CCn1cc(c(n1)C)/C=N\NC(=O)c2ccc(c3c2ccccc3)OC</chem>     | 1.466 | 0.770 | 0.696 | 0.685 | 0.779 | 1.464 | 1.193 | 0.866 | 2.059 | 0.775 | 1.545 | -6.980 | 1.424.344 |
| 158 | <chem>COc1ccc(c2c1cccc2)C(=O)N/N=C\c3enc(nc3OC)OC</chem>      | 1.466 | 0.800 | 0.665 | 0.720 | 0.879 | 1.599 | 1.163 | 0.732 | 1.895 | 0.889 | 1.690 | -8.007 | 1.500.578 |
| 159 | <chem>COc1ccc(c2c1cccc2)C(=O)N/N=C\c3ccc4c(c3)ccs4</chem>     | 1.465 | 0.764 | 0.700 | 0.691 | 0.783 | 1.474 | 1.161 | 0.869 | 2.030 | 0.779 | 1.543 | -7.012 | 1.439.127 |
| 160 | <chem>Cc1c(c(on1)C)/C=N\NC(=O)c2ccc(c3c2ccccc3)OC</chem>      | 1.463 | 0.767 | 0.696 | 0.675 | 0.779 | 1.455 | 1.215 | 0.867 | 2.082 | 0.775 | 1.542 | -6.981 | 1.403.541 |
| 161 | <chem>COc1ccc(c(c1OC)OC)C(=O)N/N=C\c2ccccc2O</chem>           | 1.459 | 0.733 | 0.726 | 0.655 | 0.883 | 1.538 | 1.194 | 0.803 | 1.997 | 0.888 | 1.620 | -7.995 | 1.359.871 |
| 162 | <chem>c1ccc(c(c1)/C=N\NC(=O)c2ccccc2ccco3)O</chem>            | 1.455 | 0.664 | 0.791 | 0.598 | 0.884 | 1.482 | 1.199 | 0.883 | 2.082 | 0.884 | 1.548 | -7.961 | 1.239.091 |
| 163 | <chem>Cc1cc(c(c(c1)/C=N\NC(=O)c2ccc(c3c2ccccc3)OC)C)OC</chem> | 1.454 | 0.817 | 0.637 | 0.725 | 0.778 | 1.503 | 1.183 | 0.778 | 1.962 | 0.778 | 1.595 | -7.007 | 1.511.933 |

|     |                                                                 |       |       |       |       |       |       |       |       |       |       |       |        |           |
|-----|-----------------------------------------------------------------|-------|-------|-------|-------|-------|-------|-------|-------|-------|-------|-------|--------|-----------|
| 164 | <chem>COc1ccc(c2c1cccc2)C(=O)N/N=C\c3cc(ccc3O)S(=O)(=O)O</chem> | 1.451 | 0.760 | 0.692 | 0.702 | 0.978 | 1.680 | 1.121 | 0.703 | 1.824 | 1.000 | 1.759 | -9.006 | 1.464.338 |
| 165 | <chem>c1ccc(c(c1)/C=N\NC(=O)c2ccccc2occc3)O</chem>              | 1.451 | 0.664 | 0.787 | 0.598 | 0.882 | 1.480 | 1.197 | 0.880 | 2.078 | 0.882 | 1.545 | -7.941 | 1.239.215 |
| 166 | <chem>COc1ccc(c2c1cccc2)C(=O)N/N=C\c3c(=O)[nH]c4ccccc4n3</chem> | 1.446 | 0.782 | 0.663 | 0.723 | 0.877 | 1.600 | 1.118 | 0.732 | 1.849 | 0.887 | 1.669 | -7.985 | 1.509.566 |
| 167 | <chem>Cc1c(cc(cc1O)F)/C=N\NC(=O)c2ccc(c3c2cccc3)OC</chem>       | 1.444 | 0.808 | 0.637 | 0.713 | 0.778 | 1.491 | 1.198 | 0.778 | 1.976 | 0.778 | 1.586 | -7.007 | 1.484.317 |
| 168 | <chem>COc1ccc(c2c1cccc2)C(=O)N/N=C\c3cc4ccccc4s3</chem>         | 1.443 | 0.745 | 0.698 | 0.681 | 0.781 | 1.462 | 1.146 | 0.868 | 2.013 | 0.777 | 1.522 | -7.000 | 1.417.221 |
| 169 | <chem>c1ccc(c(c1)/C=N\NC(=O)c2ccccc2ccccc3O)O</chem>            | 1.443 | 0.716 | 0.728 | 0.641 | 0.884 | 1.525 | 1.195 | 0.804 | 1.999 | 0.889 | 1.605 | -8.008 | 1.330.135 |
| 170 | <chem>Cc1ccc(c(c1/C=N\NC(=O)c2ccc(c3c2cccc3)OC)C)O</chem>       | 1.442 | 0.806 | 0.637 | 0.711 | 0.778 | 1.489 | 1.198 | 0.778 | 1.976 | 0.778 | 1.584 | -7.007 | 1.480.833 |
| 171 | <chem>COc1ccc(c2c1cccc2)C(=O)N/N=C\c3c(cc(cc3F)O)F</chem>       | 1.442 | 0.806 | 0.636 | 0.713 | 0.778 | 1.491 | 1.193 | 0.778 | 1.971 | 0.778 | 1.584 | -7.006 | 1.485.208 |
| 172 | <chem>Cc1ccc(c(c1O)C)/C=N\NC(=O)c2ccc(c3c2cccc3)OC</chem>       | 1.442 | 0.806 | 0.637 | 0.711 | 0.778 | 1.489 | 1.198 | 0.778 | 1.976 | 0.778 | 1.584 | -7.007 | 1.480.591 |
| 173 | <chem>COc1ccc(c2c1cccc2)C(=O)N/N=C\c3cc(c(cc3F)O)F</chem>       | 1.442 | 0.806 | 0.637 | 0.713 | 0.778 | 1.491 | 1.193 | 0.778 | 1.971 | 0.778 | 1.584 | -7.006 | 1.484.718 |
| 174 | <chem>COc1cc(c(cc1OC)OC)C(=O)N/N=C\c2ccccc2O</chem>             | 1.442 | 0.717 | 0.725 | 0.646 | 0.882 | 1.528 | 1.181 | 0.803 | 1.984 | 0.887 | 1.604 | -7.992 | 1.341.110 |
| 175 | <chem>Cc1cc(cc(c1/C=N\NC(=O)c2ccc(c3c2cccc3)OC)C)O</chem>       | 1.441 | 0.805 | 0.636 | 0.710 | 0.778 | 1.488 | 1.198 | 0.778 | 1.975 | 0.778 | 1.582 | -7.006 | 1.478.985 |
| 176 | <chem>COc1ccc(c2c1cccc2)C(=O)N/N=C\c3ccccc3S(=O)(=O)C</chem>    | 1.441 | 0.780 | 0.661 | 0.703 | 0.796 | 1.499 | 1.162 | 0.796 | 1.958 | 0.796 | 1.576 | -7.172 | 1.465.202 |
| 177 | <chem>COc1ccc(c2c1cccc2)C(=O)N/N=[CH:1]\c3ccc(cc3C(=O)O)</chem> | 1.441 | 0.807 | 0.634 | 0.723 | 0.815 | 1.537 | 1.169 | 0.740 | 1.910 | 0.819 | 1.626 | -7.379 | 1.506.684 |

|     | F                                                              |       |       |       |       |       |       |       |       |       |       |       |        |           |
|-----|----------------------------------------------------------------|-------|-------|-------|-------|-------|-------|-------|-------|-------|-------|-------|--------|-----------|
| 178 | <chem>Cc1cc(cc(c1/C=N\NC(=O)c2ccc(c3c2cccc3)OC)C)N</chem>      | 1.440 | 0.804 | 0.637 | 0.710 | 0.778 | 1.488 | 1.198 | 0.778 | 1.976 | 0.778 | 1.582 | -7.006 | 1.477.683 |
| 179 | <chem>COc1ccc(c2c1cccc2)C(=O)N/N=C\c3c4cccc4on3</chem>         | 1.439 | 0.767 | 0.672 | 0.698 | 0.805 | 1.503 | 1.149 | 0.803 | 1.952 | 0.805 | 1.572 | -7.248 | 1.454.353 |
| 180 | <chem>COc1ccc(c2c1cccc2)C(=O)N/N=C\c3c(ccc(c3Cl)O)Cl</chem>    | 1.439 | 0.802 | 0.637 | 0.706 | 0.778 | 1.484 | 1.203 | 0.778 | 1.981 | 0.778 | 1.580 | -7.007 | 1.470.608 |
| 181 | <chem>CN1CCN(CC1)C(=O)/C=N\NC(=O)c2ccc(c3c2cccc3)OC</chem>     | 1.439 | 0.753 | 0.686 | 0.682 | 0.814 | 1.496 | 1.159 | 0.814 | 1.973 | 0.814 | 1.566 | -7.327 | 1.420.500 |
| 182 | <chem>COc1ccc(c2c1cccc2)C(=O)N/N=C\c3nccs3</chem>              | 1.438 | 0.718 | 0.720 | 0.631 | 0.795 | 1.426 | 1.238 | 0.884 | 2.122 | 0.791 | 1.509 | -7.122 | 1.307.725 |
| 183 | <chem>COc1ccc(c2c1cccc2)C(=O)N/N=C\c3cc(c(cc3Cl)Cl)O</chem>    | 1.437 | 0.801 | 0.637 | 0.706 | 0.778 | 1.483 | 1.203 | 0.778 | 1.980 | 0.778 | 1.579 | -7.006 | 1.468.755 |
| 184 | <chem>COc1ccc(c2c1cccc2)C(=O)N/N=C\c3c(cc(cc3Cl)O)Cl</chem>    | 1.437 | 0.801 | 0.637 | 0.706 | 0.778 | 1.484 | 1.202 | 0.778 | 1.980 | 0.778 | 1.579 | -7.006 | 1.468.901 |
| 185 | <chem>COc1ccc(c2c1cccc2)C(=O)N/N=C\c3cccc3e4ncco4</chem>       | 1.437 | 0.768 | 0.669 | 0.716 | 0.802 | 1.518 | 1.105 | 0.802 | 1.907 | 0.802 | 1.570 | -7.222 | 1.494.688 |
| 186 | <chem>Cc1cc(ccc1/C=N\NC(=O)c2ccc(c3c2cccc3)OC)CCN(C)C</chem>   | 1.437 | 0.737 | 0.700 | 0.697 | 0.782 | 1.479 | 1.083 | 0.870 | 1.953 | 0.778 | 1.515 | -7.006 | 1.455.791 |
| 187 | <chem>COc1ccc(c2c1cccc2)C(=O)N/N=C\c3cc(ccc3C(=O)O)Cl</chem>   | 1.435 | 0.802 | 0.634 | 0.718 | 0.815 | 1.532 | 1.171 | 0.740 | 1.911 | 0.819 | 1.621 | -7.379 | 1.496.055 |
| 188 | <chem>CCOC(=O)c1cc(ccc1Cl)/C=N\NC(=O)c2ccc(c3c2cccc3)OC</chem> | 1.434 | 0.734 | 0.700 | 0.697 | 0.782 | 1.480 | 1.077 | 0.870 | 1.947 | 0.778 | 1.512 | -7.006 | 1.456.484 |
| 189 | <chem>COc1ccc(c2c1cccc2)C(=O)N/N=C\c3cccc4c3cccn4</chem>       | 1.433 | 0.796 | 0.637 | 0.721 | 0.778 | 1.499 | 1.151 | 0.778 | 1.929 | 0.778 | 1.575 | -7.009 | 1.503.615 |
| 190 | <chem>COc1ccc(c2c1cccc2)C(=O)N/N=C\c3ccnc4c3cccc4</chem>       | 1.432 | 0.796 | 0.637 | 0.721 | 0.778 | 1.499 | 1.151 | 0.778 | 1.929 | 0.778 | 1.574 | -7.008 | 1.503.289 |
| 191 | <chem>COc1ccc(c2c1cccc2)C(=O)N/N=C\c3ccco3</chem>              | 1.432 | 0.716 | 0.717 | 0.633 | 0.793 | 1.426 | 1.223 | 0.882 | 2.104 | 0.789 | 1.504 | -7.103 | 1.312.957 |

|     |                                                             |       |       |       |       |       |       |       |       |       |       |       |        |           |
|-----|-------------------------------------------------------------|-------|-------|-------|-------|-------|-------|-------|-------|-------|-------|-------|--------|-----------|
| 192 | <chem>Cn1cc(en1)/C=N\NC(=O)e2ccc(c3c2cccc3)OC</chem>        | 1.432 | 0.737 | 0.696 | 0.652 | 0.779 | 1.432 | 1.213 | 0.866 | 2.080 | 0.775 | 1.512 | -6.980 | 1.354.039 |
| 193 | <chem>COc1ccc(c2c1cccc2)C(=O)N/N=C\c3cc(c(c(e3)F)O)F</chem> | 1.431 | 0.795 | 0.637 | 0.707 | 0.778 | 1.485 | 1.184 | 0.778 | 1.962 | 0.778 | 1.572 | -7.006 | 1.473.226 |
| 194 | <chem>COc1ccc(c2c1cccc2)C(=O)N/N=C\c3ccc[nH]3</chem>        | 1.431 | 0.716 | 0.715 | 0.633 | 0.792 | 1.425 | 1.224 | 0.880 | 2.105 | 0.787 | 1.503 | -7.092 | 1.312.479 |
| 195 | <chem>COc1ccc(c2c1cccc2)C(=O)N/N=C\c3ccc(s3)Br</chem>       | 1.430 | 0.733 | 0.697 | 0.643 | 0.780 | 1.423 | 1.236 | 0.868 | 2.104 | 0.776 | 1.509 | -6.990 | 1.333.346 |
| 196 | <chem>COc1ccc(c2c1cccc2)C(=O)N/N=C\c3cccc3C(=O)O</chem>     | 1.430 | 0.796 | 0.634 | 0.708 | 0.815 | 1.523 | 1.185 | 0.740 | 1.926 | 0.819 | 1.615 | -7.379 | 1.474.199 |
| 197 | <chem>Cc1ccc(cc1/C=N\NC(=O)e2ccc(c3c2cccc3)OC)O</chem>      | 1.429 | 0.793 | 0.637 | 0.696 | 0.778 | 1.474 | 1.213 | 0.778 | 1.991 | 0.778 | 1.571 | -7.006 | 1.447.598 |
| 198 | <chem>CC(=O)Oc1ccc(cc1)/C=N\NC(=O)e2ccc(c3c2cccc3)OC</chem> | 1.429 | 0.729 | 0.700 | 0.680 | 0.782 | 1.463 | 1.108 | 0.870 | 1.978 | 0.778 | 1.507 | -7.006 | 1.418.433 |
| 199 | <chem>COc1ccc(c2c1cccc2)C(=O)N/N=C\c3ccc(cc3F)O</chem>      | 1.429 | 0.792 | 0.637 | 0.697 | 0.778 | 1.475 | 1.209 | 0.778 | 1.987 | 0.778 | 1.570 | -7.006 | 1.449.350 |
| 200 | <chem>Cc1cc(ccc1/C=N\NC(=O)e2ccc(c3c2cccc3)OC)N</chem>      | 1.429 | 0.792 | 0.637 | 0.695 | 0.778 | 1.473 | 1.214 | 0.778 | 1.991 | 0.778 | 1.570 | -7.006 | 1.446.042 |
| 201 | <chem>Cc1cc(cc(c1O)C)/C=N\NC(=O)e2ccc(c3c2cccc3)OC</chem>   | 1.428 | 0.792 | 0.637 | 0.704 | 0.778 | 1.482 | 1.187 | 0.778 | 1.965 | 0.778 | 1.570 | -7.006 | 1.465.614 |
| 202 | <chem>COc1ccc(c2c1cccc2)C(=O)N/N=C\c3cc(ccc3Cl)N</chem>     | 1.428 | 0.791 | 0.637 | 0.693 | 0.778 | 1.471 | 1.217 | 0.778 | 1.995 | 0.778 | 1.569 | -7.006 | 1.441.928 |
| 203 | <chem>COc1ccc(c2c1cccc2)C(=O)N/N=C\c3ccc(cc3Cl)N</chem>     | 1.427 | 0.791 | 0.637 | 0.693 | 0.778 | 1.471 | 1.217 | 0.778 | 1.995 | 0.778 | 1.569 | -7.006 | 1.441.847 |
| 204 | <chem>COc1ccc(c2c1cccc2)C(=O)N/N=C\c3ccc(cc3)OC4CC4</chem>  | 1.427 | 0.727 | 0.700 | 0.679 | 0.782 | 1.462 | 1.106 | 0.870 | 1.975 | 0.778 | 1.505 | -7.006 | 1.416.487 |
| 205 | <chem>COc1ccc(c2c1cccc2)C(=O)N/N=C\c3c4cccc4n[nH]3</chem>   | 1.422 | 0.765 | 0.657 | 0.696 | 0.833 | 1.530 | 1.148 | 0.756 | 1.904 | 0.838 | 1.603 | -7.549 | 1.450.865 |
| 206 | <chem>COc1ccc(c2c1cccc2)C(=O)N/N=C\c3ccc(c(c3)CO)F</chem>   | 1.421 | 0.783 | 0.639 | 0.699 | 0.779 | 1.479 | 1.179 | 0.779 | 1.959 | 0.779 | 1.562 | -7.020 | 1.456.474 |



|     |                                                               |       |       |        |       |       |       |       |       |       |       |       |        |           |
|-----|---------------------------------------------------------------|-------|-------|--------|-------|-------|-------|-------|-------|-------|-------|-------|--------|-----------|
| 207 | <chem>COc1ccc(c2c1cccc2)C(=O)N/N=C\c3ccns3</chem>             | 1.420 | 0.723 | 0.698  | 0.632 | 0.781 | 1.413 | 1.246 | 0.868 | 2.114 | 0.776 | 1.499 | -6.991 | 1.310.684 |
| 208 | <chem>COc1ccc(c2c1cccc2)C(=O)N/N=C\c3c(cccc3Br)Br</chem>      | 1.420 | 0.784 | 0.636  | 0.687 | 0.778 | 1.464 | 1.220 | 0.778 | 1.998 | 0.778 | 1.562 | -7.006 | 1.427.273 |
| 209 | <chem>COc1ccc(cc1OC)C(=O)N/N=C\c2ccccc2O</chem>               | 1.420 | 0.625 | 0.795  | 0.579 | 0.886 | 1.465 | 1.145 | 0.886 | 2.031 | 0.886 | 1.511 | -7.978 | 1.199.834 |
| 210 | <chem>C[C@H]1CCCC[C@@H]1/C=N\NC(=O)c2ccc(c3c2cccc3)OC</chem>  | 1.420 | 0.702 | 0.717  | 0.636 | 0.751 | 1.387 | 1.173 | 0.941 | 2.115 | 0.743 | 1.445 | -6.689 | 1.321.000 |
| 211 | <chem>Cc1c(c2ccccc2[nH]1)/C=N\NC(=O)c3ccc(c4c3cccc4)OC</chem> | 1.420 | 0.787 | 0.633  | 0.715 | 0.776 | 1.491 | 1.146 | 0.775 | 1.920 | 0.776 | 1.563 | -6.989 | 1.491.627 |
| 212 | <chem>COc1ccc(c2c1cccc2)C(=O)N/N=C\c3ccc(cc3)OC(F)(F)F</chem> | 1.417 | 0.717 | 0.7000 | 0.685 | 0.782 | 1.467 | 1.070 | 0.870 | 1.939 | 0.778 | 1.494 | -7.006 | 1.429.070 |
| 213 | <chem>Cc1ccc(cc1O)/C=N\NC(=O)c2ccc(c3c2ccccc3)OC</chem>       | 1.416 | 0.780 | 0.637  | 0.689 | 0.778 | 1.467 | 1.202 | 0.778 | 1.980 | 0.778 | 1.558 | -7.008 | 1.433.976 |
| 214 | <chem>c1ccc(c(c1)/C=N\NC(=O)c2ccc3c(c2)CCCO3)O</chem>         | 1.415 | 0.616 | 0.799  | 0.576 | 0.888 | 1.464 | 1.127 | 0.888 | 2.015 | 0.888 | 1.504 | -7.998 | 1.194.391 |
| 215 | <chem>COc1ccc(c2c1cccc2)C(=O)N/N=C\c3cncn3</chem>             | 1.414 | 0.746 | 0.668  | 0.657 | 0.801 | 1.459 | 1.221 | 0.801 | 2.022 | 0.801 | 1.547 | -7.215 | 1.364.852 |
| 216 | <chem>COc1ccc(c2c1cccc2)C(=O)N/N=C\c3ccc(c(c3)O)Cl</chem>     | 1.414 | 0.777 | 0.637  | 0.687 | 0.778 | 1.465 | 1.204 | 0.778 | 1.982 | 0.778 | 1.555 | -7.008 | 1.428.494 |
| 217 | <chem>COc1ccc(c2c1cccc2)C(=O)N/N=C\c3cncn3</chem>             | 1.414 | 0.747 | 0.667  | 0.658 | 0.801 | 1.458 | 1.221 | 0.800 | 2.022 | 0.801 | 1.547 | -7.211 | 1.365.329 |
| 218 | <chem>COc1ccc(c2c1cccc2)C(=O)N/N=C\c3ccccc3OCC(=O)O</chem>    | 1.414 | 0.748 | 0.666  | 0.699 | 0.879 | 1.578 | 1.104 | 0.733 | 1.837 | 0.889 | 1.637 | -8.007 | 1.457.914 |
| 219 | <chem>COc1ccc(c2c1cccc2)C(=O)N/N=C\c3nccn3</chem>             | 1.414 | 0.746 | 0.667  | 0.658 | 0.801 | 1.458 | 1.221 | 0.800 | 2.021 | 0.801 | 1.547 | -7.213 | 1.365.172 |
| 220 | <chem>COc1cc(c(c(c1)OC)C(=O)N/N=C\c2ccccc2O)OC</chem>         | 1.411 | 0.686 | 0.725  | 0.629 | 0.882 | 1.511 | 1.152 | 0.803 | 1.955 | 0.887 | 1.573 | -7.987 | 1.307.011 |

|     |                                                                  |       |       |       |       |       |       |       |       |       |       |       |        |           |
|-----|------------------------------------------------------------------|-------|-------|-------|-------|-------|-------|-------|-------|-------|-------|-------|--------|-----------|
| 221 | <chem>COc1ccc(c2c1cccc2)C(=O)N/N=C\c3ccc(c(c3)CN)F</chem>        | 1.411 | 0.774 | 0.637 | 0.695 | 0.778 | 1.473 | 1.173 | 0.778 | 1.951 | 0.778 | 1.552 | -7.006 | 1.447.085 |
| 222 | <chem>COc1ccc(c2c1cccc2)C(=O)N/N=[CH:1]\c3ccc(cc3)n4cccc4</chem> | 1.410 | 0.710 | 0.700 | 0.683 | 0.782 | 1.465 | 1.059 | 0.870 | 1.929 | 0.778 | 1.488 | -7.006 | 1.426.071 |
| 223 | <chem>Cc1cccc(c1C)C(=O)N/N=C\c2ccc(O)O</chem>                    | 1.409 | 0.631 | 0.778 | 0.566 | 0.786 | 1.352 | 1.221 | 0.986 | 2.207 | 0.778 | 1.408 | -7.003 | 1.170.594 |
| 224 | <chem>c1ccc(c(c1)/C=N\N[C:1](=O)c2c[nH]c3c2cccc3)O</chem>        | 1.408 | 0.657 | 0.750 | 0.594 | 0.858 | 1.452 | 1.194 | 0.857 | 2.051 | 0.858 | 1.515 | -7.727 | 1.230.275 |
| 225 | <chem>COc1ccc(c2c1cccc2)C(=O)N/N=C\c3ccc4c(c3)CCO4</chem>        | 1.407 | 0.770 | 0.637 | 0.697 | 0.779 | 1.476 | 1.157 | 0.777 | 1.934 | 0.779 | 1.549 | -7.017 | 1.452.674 |
| 226 | <chem>COc1ccc(c2c1cccc2)C(=O)N/N=C\c3nc4cccc4o3</chem>           | 1.407 | 0.757 | 0.649 | 0.694 | 0.788 | 1.482 | 1.138 | 0.787 | 1.924 | 0.789 | 1.546 | -7.102 | 1.445.700 |
| 227 | <chem>COc1ccc(c2c1cccc2)C(=O)N/N=C\c3ccc(c(c3)Br)OC</chem>       | 1.406 | 0.770 | 0.637 | 0.690 | 0.778 | 1.468 | 1.175 | 0.778 | 1.953 | 0.778 | 1.547 | -7.006 | 1.436.995 |
| 228 | <chem>Cc1cc(ccc1/C=N\NC(=O)c2ccc(c3c2cccc3)OC)CCO</chem>         | 1.405 | 0.768 | 0.637 | 0.698 | 0.778 | 1.476 | 1.149 | 0.778 | 1.927 | 0.778 | 1.546 | -7.006 | 1.455.565 |
| 229 | <chem>COc1ccc(c2c1cccc2)C(=O)N/N=C\c3c[nH]c4c3cccc4</chem>       | 1.404 | 0.771 | 0.633 | 0.699 | 0.776 | 1.475 | 1.154 | 0.774 | 1.929 | 0.776 | 1.547 | -6.989 | 1.457.394 |
| 230 | <chem>c1ccc(c(c1)/C=N\NC(=O)c2ccc3c(c2)ccn3)O</chem>             | 1.403 | 0.606 | 0.797 | 0.573 | 0.887 | 1.460 | 1.107 | 0.887 | 1.994 | 0.887 | 1.493 | -7.990 | 1.187.522 |
| 231 | <chem>COc1ccc(c2c1cccc2)C(=O)N/N=C\c3nc4cccc4s3</chem>           | 1.402 | 0.747 | 0.655 | 0.684 | 0.792 | 1.476 | 1.143 | 0.791 | 1.934 | 0.792 | 1.540 | -7.135 | 1.423.647 |
| 232 | <chem>COc1ccc(c2c1cccc2)C(=O)N/N=C\c3cc4cccc4[nH]3</chem>        | 1.402 | 0.751 | 0.651 | 0.688 | 0.789 | 1.478 | 1.137 | 0.788 | 1.925 | 0.790 | 1.540 | -7.111 | 1.434.513 |
| 233 | <chem>CCc1cc(cc(c1/C=N\NC(=O)c2ccc(c3c2cccc3)OC)C)O</chem>       | 1.399 | 0.815 | 0.584 | 0.723 | 0.774 | 1.497 | 1.185 | 0.704 | 1.888 | 0.778 | 1.593 | -7.006 | 1.507.241 |
| 234 | <chem>COc1ccc(c2c1cccc2)C(=O)N/N=C\c3ccc(c(c3)C(F)(F)F)O</chem>  | 1.396 | 0.760 | 0.636 | 0.708 | 0.778 | 1.486 | 1.106 | 0.778 | 1.884 | 0.778 | 1.537 | -7.006 | 1.477.925 |
| 235 | <chem>COc1ccc(c2c1cccc2)C(=O)N/N=C\c3ccnn3</chem>                | 1.396 | 0.746 | 0.649 | 0.657 | 0.800 | 1.457 | 1.223 | 0.776 | 1.998 | 0.801 | 1.548 | -7.217 | 1.364.035 |

|     |                                                                  |       |       |       |       |       |       |       |       |       |       |       |        |           |
|-----|------------------------------------------------------------------|-------|-------|-------|-------|-------|-------|-------|-------|-------|-------|-------|--------|-----------|
| 236 | <chem>COc1ccc(c2c1cccc2)C(=O)N/N=C\C=C(\C=[N])/OC</chem>         | 1.395 | 0.696 | 0.699 | 0.625 | 0.781 | 1.407 | 1.194 | 0.869 | 2.063 | 0.777 | 1.473 | -6.999 | 1.297.546 |
| 237 | <chem>c1ccc(c(c1)/C=N\NC(=O)c2ccc3c(c2)CCO3)O</chem>             | 1.392 | 0.594 | 0.798 | 0.557 | 0.889 | 1.445 | 1.126 | 0.887 | 2.013 | 0.889 | 1.483 | -8.004 | 1.153.423 |
| 238 | <chem>COc1ccc(c2c1cccc2)C(=O)N/N=C\c3cccc3S(=O)(=O)N</chem>      | 1.391 | 0.781 | 0.610 | 0.704 | 0.796 | 1.500 | 1.162 | 0.723 | 1.885 | 0.800 | 1.581 | -7.206 | 1.467.139 |
| 239 | <chem>c1ccc(c(c1)/C=N\NC(=O)c2cccc3c2nsn3)O</chem>               | 1.388 | 0.670 | 0.719 | 0.597 | 0.879 | 1.476 | 1.221 | 0.798 | 2.019 | 0.884 | 1.553 | -7.958 | 1.236.505 |
| 240 | <chem>c1ccc(c(c1)/C=N\NC(=O)c2ccc(cc2)C(F)(F)F)O</chem>          | 1.385 | 0.608 | 0.777 | 0.571 | 0.786 | 1.357 | 1.120 | 0.986 | 2.105 | 0.777 | 1.385 | -7.000 | 1.183.356 |
| 241 | <chem>COc1ccc(c2c1cccc2)C(=O)N/N=C\c3c(cccn3)C(=O)O</chem>       | 1.380 | 0.796 | 0.584 | 0.709 | 0.811 | 1.520 | 1.183 | 0.676 | 1.859 | 0.820 | 1.616 | -7.382 | 1.476.791 |
| 242 | <chem>COc1ccc(c2c1cccc2)C(=O)N/N=C\c3cc(c(c(c3)Cl)O)OC</chem>    | 1.377 | 0.793 | 0.584 | 0.713 | 0.774 | 1.486 | 1.167 | 0.704 | 1.870 | 0.778 | 1.571 | -7.007 | 1.485.314 |
| 243 | <chem>COc1ccc(c2c1cccc2)C(=O)N/N=C\c3ccc(s3)c4cccc4</chem>       | 1.377 | 0.679 | 0.697 | 0.660 | 0.780 | 1.441 | 1.045 | 0.868 | 1.913 | 0.776 | 1.456 | -6.990 | 1.377.417 |
| 244 | <chem>COc1ccc(c2c1cccc2)C(=O)N/N=C\c3cc(cc(c3Br)OC)OC</chem>     | 1.376 | 0.792 | 0.584 | 0.719 | 0.774 | 1.493 | 1.147 | 0.704 | 1.851 | 0.778 | 1.570 | -7.006 | 1.500.696 |
| 245 | <chem>COc1ccc(c2c1cccc2)C(=O)N/N=C\Cc3cccn3</chem>               | 1.374 | 0.729 | 0.645 | 0.654 | 0.745 | 1.399 | 1.185 | 0.828 | 2.013 | 0.741 | 1.469 | -6.669 | 1.359.693 |
| 246 | <chem>COc1ccc(c2c1cccc2)C(=O)N/N=C\N3CCC[C@H]3C(=O)O</chem><br>C | 1.373 | 0.752 | 0.621 | 0.683 | 0.728 | 1.411 | 1.154 | 0.809 | 1.963 | 0.724 | 1.475 | -6.517 | 1.422.881 |
| 247 | <chem>COc1ccc(c2c1cccc2)C(=O)N/N=C\c3ccc(cc3Br)N</chem>          | 1.373 | 0.789 | 0.583 | 0.692 | 0.774 | 1.465 | 1.218 | 0.704 | 1.921 | 0.778 | 1.567 | -7.006 | 1.438.414 |
| 248 | <chem>c1ccc(c(c1)/C=N\NC(=O)c2cccc2Cl)O</chem>                   | 1.372 | 0.595 | 0.777 | 0.537 | 0.786 | 1.323 | 1.219 | 0.986 | 2.205 | 0.777 | 1.372 | -7.000 | 1.109.984 |
| 249 | <chem>COc1cc(cc(c1OC)OC)C(=O)N/N=C\c2cccc2O</chem>               | 1.370 | 0.645 | 0.725 | 0.606 | 0.882 | 1.488 | 1.111 | 0.802 | 1.913 | 0.887 | 1.532 | -7.987 | 1.258.790 |

|     |                                                                     |       |       |       |       |       |       |       |       |       |       |       |        |           |
|-----|---------------------------------------------------------------------|-------|-------|-------|-------|-------|-------|-------|-------|-------|-------|-------|--------|-----------|
| 250 | <chem>COc1ccc(c2c1cccc2)C(=O)N/N=[CH:1]\e3ccc(c(c3)OC)N</chem>      | 1.368 | 0.784 | 0.584 | 0.700 | 0.774 | 1.474 | 1.180 | 0.704 | 1.884 | 0.778 | 1.562 | -7.007 | 1.458.232 |
| 251 | <chem>c1ccc(c(c1)/C=N\NC(=O)c2cccc2C3CCCC3)O</chem>                 | 1.367 | 0.652 | 0.715 | 0.602 | 0.792 | 1.394 | 1.147 | 0.881 | 2.028 | 0.787 | 1.439 | -7.091 | 1.248.437 |
| 252 | <chem>c1ccc(c(c1)/C=N\NC(=O)c2ccc3c(c2)OCCCO3)O</chem>              | 1.365 | 0.639 | 0.727 | 0.598 | 0.883 | 1.481 | 1.120 | 0.804 | 1.924 | 0.888 | 1.527 | -8.001 | 1.240.413 |
| 253 | <chem>Cc1nnc(o1)/C=N\NC(=O)c2ccc(c3c2cccc3)OC</chem>                | 1.364 | 0.736 | 0.628 | 0.653 | 0.783 | 1.436 | 1.208 | 0.760 | 1.969 | 0.784 | 1.520 | -7.062 | 1.355.725 |
| 254 | <chem>COc1ccc2cc(ccc2c1)/C=N\NC(=O)c3ccc(c4c3cccc4)OC</chem>        | 1.360 | 0.725 | 0.636 | 0.698 | 0.777 | 1.476 | 1.055 | 0.777 | 1.832 | 0.778 | 1.502 | -7.002 | 1.459.156 |
| 255 | <chem>Cc1ccc(c(c1O)C(=O)O)/C=N\NC(=O)c2ccc(c3c2cccc3)OC</chem>      | 1.359 | 0.819 | 0.541 | 0.737 | 0.806 | 1.543 | 1.157 | 0.622 | 1.779 | 0.819 | 1.638 | -7.379 | 1.538.203 |
| 256 | <chem>Cc1ccc(c(c1O)C(=O)O)/[CH:1]=N\NC(=O)c2ccc(c3c2cccc3)OC</chem> | 1.359 | 0.819 | 0.541 | 0.737 | 0.806 | 1.543 | 1.157 | 0.622 | 1.778 | 0.819 | 1.638 | -7.378 | 1.538.122 |
| 257 | <chem>CCc1cc(ccc1O)/C=N\NC(=O)c2ccc(c3c2cccc3)OC</chem>             | 1.358 | 0.774 | 0.584 | 0.694 | 0.774 | 1.468 | 1.175 | 0.704 | 1.879 | 0.778 | 1.552 | -7.006 | 1.445.577 |
| 258 | <chem>COc1ccc(c2c1cccc2)C(=O)N/N=C\c3ccc(cc3Cl)C(=O)O</chem>        | 1.357 | 0.774 | 0.583 | 0.703 | 0.774 | 1.477 | 1.150 | 0.703 | 1.853 | 0.778 | 1.552 | -7.006 | 1.465.921 |
| 259 | <chem>e1ccc(c(c1)/C=N\NC(=O)c2cc(c(c(c2)Cl)Cl)Cl)O</chem>           | 1.356 | 0.579 | 0.777 | 0.540 | 0.786 | 1.326 | 1.142 | 0.986 | 2.128 | 0.777 | 1.356 | -7.001 | 1.117.206 |
| 260 | <chem>c1ccc(c(c1)/C=N\NC(=O)c2ccc(cc2)O)O</chem>                    | 1.356 | 0.561 | 0.795 | 0.519 | 0.886 | 1.405 | 1.166 | 0.886 | 2.052 | 0.886 | 1.446 | -7.978 | 1.072.622 |
| 261 | <chem>c1ccc(c(c1)/C=N\NC(=O)c2ccc(c(c2)F)F)O</chem>                 | 1.355 | 0.578 | 0.777 | 0.537 | 0.786 | 1.324 | 1.149 | 0.986 | 2.135 | 0.777 | 1.355 | -7.001 | 1.111.449 |
| 262 | <chem>COc1ccc(c2c1cccc2)C(=O)N/N=C\c3cnc3c4cccc4</chem>             | 1.355 | 0.722 | 0.633 | 0.690 | 0.775 | 1.465 | 1.069 | 0.775 | 1.844 | 0.775 | 1.497 | -6.981 | 1.440.509 |
| 263 | <chem>Cc1c2cc(ccc2sc1C(=O)N/N=C\c3cccc3O)Cl</chem>                  | 1.354 | 0.656 | 0.698 | 0.603 | 0.781 | 1.384 | 1.157 | 0.868 | 2.025 | 0.777 | 1.433 | -6.998 | 1.250.044 |

|     |                                                                      |       |       |       |       |       |       |       |       |       |       |       |        |           |
|-----|----------------------------------------------------------------------|-------|-------|-------|-------|-------|-------|-------|-------|-------|-------|-------|--------|-----------|
| 264 | <chem>COc1ccc(c2c1cccc2)C(=O)NCCc3ccccc3O</chem>                     | 1.354 | 0.675 | 0.679 | 0.624 | 0.768 | 1.392 | 1.137 | 0.854 | 1.991 | 0.764 | 1.439 | -6.878 | 1.296.978 |
| 265 | <chem>COc1ccc(c2c1cccc2)C(=O)N/N=C\c3ccccc3)c4cnco4</chem>           | 1.354 | 0.717 | 0.637 | 0.687 | 0.778 | 1.465 | 1.064 | 0.778 | 1.842 | 0.778 | 1.495 | -7.006 | 1.435.287 |
| 266 | <chem>c1ccc(c(c1)/C=N\NC(=O)c2ccc(c(c2)Cl)Cl)O</chem>                | 1.353 | 0.576 | 0.777 | 0.532 | 0.786 | 1.318 | 1.165 | 0.986 | 2.151 | 0.777 | 1.353 | -7.002 | 1.100.096 |
| 267 | <chem>COc1ccc(c2c1cccc2)C(=O)N/N=[CH:1]\c3ccc(c(c3)CN)OC</chem>      | 1.352 | 0.769 | 0.584 | 0.700 | 0.774 | 1.474 | 1.146 | 0.704 | 1.849 | 0.778 | 1.546 | -7.006 | 1.459.316 |
| 268 | <chem>CCOC[C@@H]1CCCN1/[CH:1]=N\NC(=O)c2ccc(c3c2ccc<br/>e3)OC</chem> | 1.350 | 0.731 | 0.619 | 0.669 | 0.727 | 1.395 | 1.145 | 0.808 | 1.953 | 0.723 | 1.453 | -6.507 | 1.391.771 |
| 269 | <chem>COc1ccc(c2c1cccc2)C(=O)N/N=C\c3ccc(cc3)c4ncsc4</chem>          | 1.349 | 0.713 | 0.637 | 0.680 | 0.778 | 1.458 | 1.071 | 0.778 | 1.849 | 0.778 | 1.491 | -7.006 | 1.419.990 |
| 270 | <chem>COc1ccc(c2c1cccc2)C(=O)N/N=C\c3ccccc3S(=O)(=O)O</chem>         | 1.346 | 0.782 | 0.563 | 0.705 | 0.792 | 1.498 | 1.162 | 0.661 | 1.823 | 0.801 | 1.584 | -7.216 | 1.469.915 |
| 271 | <chem>COc1ccc(c2c1cccc2)C(=O)N/N=C\c3cc(nc(n3)OC)OC</chem>           | 1.344 | 0.782 | 0.562 | 0.710 | 0.792 | 1.502 | 1.148 | 0.660 | 1.807 | 0.801 | 1.583 | -7.214 | 1.481.035 |
| 272 | <chem>c1ccc(c(c1)/C=N\NC(=O)c2ccc3c(c2)OCCO3)O</chem>                | 1.344 | 0.618 | 0.726 | 0.579 | 0.883 | 1.462 | 1.123 | 0.803 | 1.926 | 0.888 | 1.506 | -7.998 | 1.200.329 |
| 273 | <chem>e1ccc(c(c1)/C=N\NC(=O)c2ccc(cc2)Cl)O</chem>                    | 1.340 | 0.562 | 0.777 | 0.518 | 0.786 | 1.305 | 1.176 | 0.986 | 2.162 | 0.777 | 1.340 | -7.001 | 1.070.681 |
| 274 | <chem>c1ccc(c(c1)/C=N\NC(=O)c2ccc(cc2)Cl)O</chem>                    | 1.340 | 0.562 | 0.777 | 0.518 | 0.786 | 1.305 | 1.176 | 0.986 | 2.162 | 0.777 | 1.340 | -7.001 | 1.070.663 |
| 275 | <chem>c1ccc(c(c1)/C=N\NC(=O)c2ccc(cc2)F)O</chem>                     | 1.339 | 0.562 | 0.777 | 0.520 | 0.786 | 1.306 | 1.167 | 0.986 | 2.153 | 0.777 | 1.339 | -7.001 | 1.074.632 |
| 276 | <chem>e1ccc(c(c1)/C=N\NC(=O)c2ccc(cc2)C3CCCC3)O</chem>               | 1.339 | 0.639 | 0.700 | 0.594 | 0.782 | 1.376 | 1.133 | 0.870 | 2.003 | 0.777 | 1.416 | -7.001 | 1.232.784 |
| 277 | <chem>COc1ccc(c2c1cccc2)C(=O)N/N=C\c3ccc4c(c3)oc(=O)[nH]4</chem>     | 1.338 | 0.754 | 0.584 | 0.700 | 0.775 | 1.475 | 1.113 | 0.703 | 1.816 | 0.779 | 1.533 | -7.018 | 1.460.932 |

|     |                                                                |       |       |       |       |       |       |       |       |       |       |       |        |           |
|-----|----------------------------------------------------------------|-------|-------|-------|-------|-------|-------|-------|-------|-------|-------|-------|--------|-----------|
| 278 | <chem>COc1ccc(c2c1cccc2)C(=O)N/N=C\C@H]3C=CN=N3</chem>         | 1.337 | 0.656 | 0.681 | 0.602 | 0.729 | 1.330 | 1.161 | 0.913 | 2.074 | 0.720 | 1.377 | -6.488 | 1.247.621 |
| 279 | <chem>COc1ccc(c2c1cccc2)C(=O)N/N=C\C3CCOCC3</chem>             | 1.337 | 0.693 | 0.643 | 0.625 | 0.744 | 1.369 | 1.186 | 0.827 | 2.013 | 0.740 | 1.433 | -6.661 | 1.297.376 |
| 280 | <chem>COc1ccc(c2c1cccc2)C(=O)N/N=C\c3ccc(c(c3)O)C(=O)OC</chem> | 1.333 | 0.749 | 0.584 | 0.701 | 0.774 | 1.474 | 1.102 | 0.704 | 1.805 | 0.778 | 1.527 | -7.007 | 1.462.043 |
| 281 | <chem>COc1ccc(c2c1cccc2)C(=O)N/N=[CH:1]\N3CCCCC3</chem>        | 1.332 | 0.738 | 0.594 | 0.648 | 0.670 | 1.318 | 1.230 | 0.840 | 2.069 | 0.663 | 1.400 | -5.967 | 1.345.437 |
| 282 | <chem>COc1cc(ccc1O)C(=O)N/N=C\c2ccccc2O</chem>                 | 1.331 | 0.607 | 0.724 | 0.562 | 0.881 | 1.443 | 1.155 | 0.802 | 1.957 | 0.886 | 1.493 | -7.981 | 1.162.653 |
| 283 | <chem>COc1ccc(c2c1cccc2)C(=O)N/N=C\c3cc(c(c(c3)OC)O)OC</chem>  | 1.330 | 0.791 | 0.539 | 0.722 | 0.769 | 1.492 | 1.138 | 0.642 | 1.780 | 0.778 | 1.569 | -7.007 | 1.507.115 |
| 284 | <chem>COc1ccccc1C(=O)N/N=C\c2ccccc2O</chem>                    | 1.330 | 0.630 | 0.700 | 0.567 | 0.782 | 1.349 | 1.214 | 0.870 | 2.084 | 0.777 | 1.407 | -7.001 | 1.172.637 |
| 285 | <chem>COc1ccc(c2c1cccc2)C(=O)N/N=C\C@@H]3CCCc4c3cccc4</chem>   | 1.329 | 0.699 | 0.630 | 0.664 | 0.735 | 1.399 | 1.081 | 0.816 | 1.897 | 0.730 | 1.430 | -6.579 | 1.385.154 |
| 286 | <chem>CN(C)Cc1cc(ccc1O)/C=N\NC(=O)c2ccc(c3c2cccc3)OC</chem>    | 1.328 | 0.745 | 0.584 | 0.696 | 0.774 | 1.469 | 1.105 | 0.704 | 1.808 | 0.778 | 1.523 | -7.006 | 1.451.168 |
| 287 | <chem>COc1ccc(c2c1cccc2)C(=O)N/N=C\c3c4ccc(cc4on3)O</chem>     | 1.328 | 0.761 | 0.567 | 0.703 | 0.796 | 1.499 | 1.120 | 0.663 | 1.784 | 0.805 | 1.566 | -7.248 | 1.467.506 |
| 288 | <chem>c1ccc(c(c1)/C=N\NC(=O)c2ccccc2)Cl)O</chem>               | 1.324 | 0.546 | 0.777 | 0.509 | 0.786 | 1.295 | 1.155 | 0.986 | 2.141 | 0.777 | 1.324 | -7.001 | 1.050.993 |
| 289 | <chem>c1ccc(c(c1)/C=N\NC(=O)c2ccccc2)Cl)O</chem>               | 1.324 | 0.546 | 0.777 | 0.509 | 0.786 | 1.295 | 1.155 | 0.986 | 2.141 | 0.777 | 1.324 | -7.001 | 1.050.984 |
| 290 | <chem>c1ccc(c(c1)/C=N\NC(=O)c2ccc(cc2)C#N)O</chem>             | 1.322 | 0.580 | 0.741 | 0.538 | 0.808 | 1.346 | 1.157 | 0.899 | 2.057 | 0.804 | 1.384 | -7.240 | 1.112.588 |
| 291 | <chem>COc1ccc(c2c1cccc2)C(=O)N/N=C\c3ccc(c(c3)O)N</chem>       | 1.319 | 0.780 | 0.539 | 0.690 | 0.770 | 1.460 | 1.201 | 0.642 | 1.844 | 0.778 | 1.559 | -7.008 | 1.435.939 |

|     |                                                        |       |       |       |       |       |       |       |       |       |       |       |        |           |
|-----|--------------------------------------------------------|-------|-------|-------|-------|-------|-------|-------|-------|-------|-------|-------|--------|-----------|
| 292 | COc1ccc(c2c1cccc2)C(=O)N/N=C\c3ccc(c(c3)N)O            | 1.319 | 0.780 | 0.539 | 0.690 | 0.769 | 1.460 | 1.201 | 0.642 | 1.843 | 0.778 | 1.558 | -7.007 | 1.435.883 |
| 293 | COc1ccc(c2c1cccc2)C(=O)N/N=C\c3ccc(c(c3)N)N            | 1.319 | 0.780 | 0.539 | 0.690 | 0.769 | 1.459 | 1.202 | 0.642 | 1.844 | 0.778 | 1.558 | -7.007 | 1.434.699 |
| 294 | c1ccc(c(c1)/C=N\NC(=O)e2ccc3c(c2)OCO3)O                | 1.317 | 0.598 | 0.719 | 0.561 | 0.879 | 1.440 | 1.125 | 0.798 | 1.923 | 0.884 | 1.482 | -7.963 | 1.162.090 |
| 295 | COc1ccc(c2c1cccc2)C(=O)N/N=C\c3ccc(s3)C(=O)O           | 1.317 | 0.736 | 0.581 | 0.664 | 0.772 | 1.436 | 1.172 | 0.701 | 1.873 | 0.776 | 1.512 | -6.990 | 1.381.260 |
| 296 | COc1ccc(c2c1cccc2)C(=O)N/N=C\c3ccc(cc3Cl)n4ccnc4       | 1.315 | 0.732 | 0.584 | 0.702 | 0.774 | 1.476 | 1.060 | 0.704 | 1.764 | 0.778 | 1.509 | -7.006 | 1.468.310 |
| 297 | CC(C)c1ccc(cc1)C(=O)N/N=C\c2ccc2O                      | 1.313 | 0.613 | 0.700 | 0.562 | 0.782 | 1.344 | 1.173 | 0.869 | 2.042 | 0.777 | 1.391 | -7.001 | 1.163.980 |
| 298 | c1ccc(cc1)c2ccccc2C(=O)N/N=C\c3ccccc3O                 | 1.312 | 0.612 | 0.700 | 0.589 | 0.782 | 1.372 | 1.066 | 0.870 | 1.936 | 0.778 | 1.390 | -7.005 | 1.224.510 |
| 299 | COc1ccc(c2c1cccc2)C(=O)N/N=C\c3ccc(c(c3)[N+](=O)[O-])O | 1.312 | 0.773 | 0.538 | 0.706 | 0.770 | 1.476 | 1.141 | 0.642 | 1.783 | 0.778 | 1.552 | -7.010 | 1.471.729 |
| 300 | c1ccc(c(c1)/C=N\NC(=O)e2ccc3c(c2)CCCC3)O               | 1.310 | 0.610 | 0.700 | 0.571 | 0.782 | 1.353 | 1.127 | 0.870 | 1.996 | 0.778 | 1.388 | -7.005 | 1.182.974 |
| 301 | COc1ccc(c2c1cccc2)C(=O)N/N=C\c3enc[nH]3                | 1.309 | 0.715 | 0.595 | 0.633 | 0.783 | 1.416 | 1.220 | 0.712 | 1.932 | 0.787 | 1.502 | -7.091 | 1.312.652 |
| 302 | c1ccc(cc1)C(=O)N/N=C\c2ccccc2O                         | 1.308 | 0.531 | 0.777 | 0.494 | 0.786 | 1.280 | 1.163 | 0.986 | 2.149 | 0.777 | 1.308 | -7.002 | 1.019.274 |
| 303 | COc1ccc(c2c1cccc2)C(=O)N/N=C\c3[nH]c[nH]3              | 1.307 | 0.715 | 0.592 | 0.633 | 0.781 | 1.414 | 1.220 | 0.710 | 1.930 | 0.785 | 1.500 | -7.072 | 1.313.109 |
| 304 | c1ccc(c(c1)/C=N\NC(=O)e2ccc(cc2)[N+](=O)[O-])O         | 1.305 | 0.599 | 0.706 | 0.558 | 0.828 | 1.386 | 1.140 | 0.827 | 1.967 | 0.828 | 1.427 | -7.460 | 1.154.808 |
| 305 | COc1ccc(c2c1cccc2)C(=O)N/N=C\c3[nH]c4ccccc4n3          | 1.305 | 0.754 | 0.551 | 0.692 | 0.781 | 1.473 | 1.136 | 0.651 | 1.787 | 0.790 | 1.544 | -7.114 | 1.441.578 |

|     |                                                               |       |       |       |       |       |       |       |       |       |       |       |        |           |
|-----|---------------------------------------------------------------|-------|-------|-------|-------|-------|-------|-------|-------|-------|-------|-------|--------|-----------|
| 306 | <chem>COc1ccc(c2c1cccc2)C(=O)N/N=C\c3ccc(s3)CN4CCCC4</chem>   | 1.304 | 0.670 | 0.634 | 0.652 | 0.776 | 1.428 | 1.043 | 0.776 | 1.819 | 0.776 | 1.446 | -6.990 | 1.360.227 |
| 307 | <chem>c1ccc2cc(ccc2c1)C(=O)N/N=C\c3ccccc3O</chem>             | 1.303 | 0.605 | 0.698 | 0.571 | 0.781 | 1.352 | 1.110 | 0.868 | 1.978 | 0.777 | 1.382 | -6.995 | 1.183.690 |
| 308 | <chem>c1ccc(c(c1)/C=N\NC(=O)e2cccs2)O</chem>                  | 1.300 | 0.526 | 0.774 | 0.481 | 0.784 | 1.266 | 1.213 | 0.984 | 2.197 | 0.776 | 1.301 | -6.987 | 991.573   |
| 309 | <chem>Cc1ccc2ccc(cc2c1)C(=O)N/N=C\c3ccccc3O</chem>            | 1.295 | 0.595 | 0.700 | 0.572 | 0.782 | 1.354 | 1.072 | 0.870 | 1.942 | 0.778 | 1.373 | -7.006 | 1.186.821 |
| 310 | <chem>c1ccc(c(c1)/C=N\NC(=O)C2CCCC2)O</chem>                  | 1.294 | 0.545 | 0.750 | 0.499 | 0.770 | 1.269 | 1.201 | 0.966 | 2.167 | 0.762 | 1.306 | -6.859 | 1.029.485 |
| 311 | <chem>e1ccc(c(c1)/C=N\NC(=O)e2ccc3c(c2)ccs3)O</chem>          | 1.294 | 0.594 | 0.700 | 0.554 | 0.783 | 1.337 | 1.138 | 0.870 | 2.007 | 0.778 | 1.372 | -7.010 | 1.147.041 |
| 312 | <chem>COc1ccc(c2c1cccc2)C(=O)N/N=C\[C@H]3CCCN3</chem>         | 1.294 | 0.699 | 0.595 | 0.628 | 0.746 | 1.374 | 1.194 | 0.746 | 1.940 | 0.746 | 1.445 | -6.719 | 1.302.384 |
| 313 | <chem>c1ccc(cc1)c2ccc(cc2)C(=O)N/N=C\c3ccccc3O</chem>         | 1.293 | 0.594 | 0.699 | 0.579 | 0.781 | 1.360 | 1.047 | 0.869 | 1.916 | 0.777 | 1.371 | -6.999 | 1.201.970 |
| 314 | <chem>COc1ccc(c2c1cccc2)C(=O)N/N=C\c3ccc(cc3)n4ccnc4</chem>   | 1.292 | 0.709 | 0.584 | 0.683 | 0.774 | 1.456 | 1.056 | 0.704 | 1.760 | 0.778 | 1.486 | -7.006 | 1.425.947 |
| 315 | <chem>COc1ccc(c2c1cccc2)C(=O)N/N=C\[C@H]3CCCC[C@@H]3O</chem>  | 1.289 | 0.702 | 0.587 | 0.637 | 0.740 | 1.377 | 1.170 | 0.740 | 1.910 | 0.740 | 1.442 | -6.663 | 1.322.583 |
| 316 | <chem>COc1ccc2c(c1)nc(o2)/C=N\NC(=O)c3ccc(c4c3cccc4)OC</chem> | 1.288 | 0.702 | 0.586 | 0.680 | 0.776 | 1.456 | 1.048 | 0.705 | 1.753 | 0.781 | 1.483 | -7.031 | 1.420.574 |
| 317 | <chem>c1ccc(cc1)CC(=O)N/N=C\c2ccccc2O</chem>                  | 1.285 | 0.556 | 0.729 | 0.515 | 0.758 | 1.272 | 1.168 | 0.950 | 2.118 | 0.749 | 1.305 | -6.749 | 1.062.875 |
| 318 | <chem>COc1ccc(c(c1)C(=O)N/N=C\c2ccccc2)OC</chem>              | 1.283 | 0.647 | 0.636 | 0.592 | 0.777 | 1.369 | 1.169 | 0.778 | 1.947 | 0.777 | 1.425 | -7.002 | 1.226.715 |
| 319 | <chem>CS(=O)(=O)c1ccc(cc1)C(=O)N/N=C\c2ccccc2O</chem>         | 1.282 | 0.620 | 0.662 | 0.572 | 0.797 | 1.369 | 1.157 | 0.797 | 1.953 | 0.797 | 1.417 | -7.174 | 1.184.633 |



|     |                                                                         |       |       |       |       |       |       |       |       |       |       |       |        |           |
|-----|-------------------------------------------------------------------------|-------|-------|-------|-------|-------|-------|-------|-------|-------|-------|-------|--------|-----------|
| 320 | <chem>COc1ccc(c2c1cccc2)C(=O)N/N=C\c3cc(c(c(e3)OC)O)[N+](=O)[O-]</chem> | 1.282 | 0.782 | 0.500 | 0.728 | 0.765 | 1.493 | 1.106 | 0.590 | 1.696 | 0.778 | 1.560 | -7.007 | 1.520.528 |
| 321 | <chem>c1ccc(c(c1)/C=N\NC(=O)e2ccsc2)O</chem>                            | 1.280 | 0.506 | 0.773 | 0.470 | 0.784 | 1.254 | 1.182 | 0.983 | 2.165 | 0.775 | 1.282 | -6.981 | 967.961   |
| 322 | <chem>COc1cc(cc2c1cccc2)C(=O)N/N=C\c3ccccc3O</chem>                     | 1.278 | 0.642 | 0.636 | 0.608 | 0.777 | 1.385 | 1.096 | 0.777 | 1.874 | 0.777 | 1.420 | -7.001 | 1.263.401 |
| 323 | <chem>c1ccc(c(c1)CC(=O)N/N=C\c2ccccc2O)Cl</chem>                        | 1.278 | 0.557 | 0.721 | 0.521 | 0.753 | 1.274 | 1.139 | 0.944 | 2.084 | 0.745 | 1.301 | -6.707 | 1.077.441 |
| 324 | <chem>e1ccc(c(c1)/C=N\NC(=O)e2c[nH]c(=O)[nH]e2=O)O</chem>               | 1.278 | 0.619 | 0.658 | 0.563 | 0.872 | 1.435 | 1.193 | 0.728 | 1.921 | 0.882 | 1.501 | -7.945 | 1.164.401 |
| 325 | <chem>COc1ccc(c2c1cccc2)C(=O)N/N=[CH:1]\N3CCOCC3</chem>                 | 1.277 | 0.737 | 0.540 | 0.649 | 0.666 | 1.316 | 1.224 | 0.741 | 1.965 | 0.663 | 1.400 | -5.968 | 1.347.851 |
| 326 | <chem>COc1ccc(c2c1cccc2)C(=O)N/N=[CH:1]\CCC3CCCC3</chem>                | 1.273 | 0.672 | 0.601 | 0.619 | 0.675 | 1.294 | 1.146 | 0.846 | 1.991 | 0.667 | 1.339 | -6.010 | 1.285.425 |
| 327 | <chem>COc1ccc(c2c1cccc2)C(=O)N/N=[CH:1]\CCC3CCCC3</chem>                | 1.271 | 0.666 | 0.605 | 0.622 | 0.678 | 1.300 | 1.117 | 0.850 | 1.966 | 0.670 | 1.336 | -6.037 | 1.293.378 |
| 328 | <chem>COc1ccc(c2c1cccc2)C(=O)N/N=C\C=C\c3ccccc3Cl</chem>                | 1.267 | 0.667 | 0.600 | 0.634 | 0.674 | 1.309 | 1.083 | 0.845 | 1.928 | 0.667 | 1.333 | -6.005 | 1.320.104 |
| 329 | <chem>COc1ccc(c2c1cccc2)C(=O)N/N=C\Cc3ccccc3O</chem>                    | 1.266 | 0.690 | 0.576 | 0.642 | 0.731 | 1.373 | 1.123 | 0.731 | 1.854 | 0.731 | 1.421 | -6.584 | 1.334.892 |
| 330 | <chem>CN(/C=N\NC(=O)c1ccc(c2c1cccc2)OC)c3ccccc3</chem>                  | 1.264 | 0.722 | 0.543 | 0.659 | 0.632 | 1.292 | 1.150 | 0.793 | 1.943 | 0.625 | 1.347 | -5.633 | 1.371.539 |
| 331 | <chem>COc1ccc(c2c1cccc2)C(=O)N/N=C\c3cc(c(c(e3)O)O)O</chem>             | 1.261 | 0.794 | 0.467 | 0.707 | 0.761 | 1.468 | 1.184 | 0.547 | 1.731 | 0.778 | 1.572 | -7.008 | 1.472.174 |
| 332 | <chem>e1ccc(c(c1)/C=N\NC(=O)e2ccc(cc2)Br)O</chem>                       | 1.261 | 0.561 | 0.700 | 0.517 | 0.782 | 1.299 | 1.179 | 0.870 | 2.048 | 0.777 | 1.339 | -7.001 | 1.068.361 |
| 333 | <chem>c1ccc(c(c1)/C=N\NC(=O)e2ccncc2)O</chem>                           | 1.261 | 0.532 | 0.728 | 0.496 | 0.800 | 1.296 | 1.162 | 0.890 | 2.052 | 0.796 | 1.328 | -7.167 | 1.022.584 |

|     |                                                                |       |       |       |       |       |       |       |       |       |       |       |        |           |
|-----|----------------------------------------------------------------|-------|-------|-------|-------|-------|-------|-------|-------|-------|-------|-------|--------|-----------|
| 334 | <chem>COc1ccc(c2c1cccc2)C(=O)N/N=C\c3nc(on3)c4cccc4</chem>     | 1.250 | 0.667 | 0.583 | 0.660 | 0.774 | 1.433 | 1.018 | 0.703 | 1.721 | 0.778 | 1.445 | -7.007 | 1.377.409 |
| 335 | <chem>COc1ccc(c2c1cccc2)C(=O)N/N=C\c3esc(n3)N4CCOCC4</chem>    | 1.246 | 0.658 | 0.588 | 0.648 | 0.777 | 1.425 | 1.025 | 0.707 | 1.731 | 0.781 | 1.440 | -7.037 | 1.352.518 |
| 336 | <chem>c1ccc(cc1)c2cccc(c2)C(=O)N/N=C\c3cccc3O</chem>           | 1.242 | 0.634 | 0.608 | 0.602 | 0.718 | 1.321 | 1.090 | 0.799 | 1.889 | 0.714 | 1.348 | -6.433 | 1.251.169 |
| 337 | <chem>COc1ccc(c2c1cccc2)C(=O)N/N=C\C(=O)O</chem>               | 1.242 | 0.612 | 0.630 | 0.558 | 0.774 | 1.331 | 1.188 | 0.773 | 1.961 | 0.774 | 1.385 | -6.968 | 1.153.282 |
| 338 | <chem>c1ccc(c1)/C=N\NC(=O)c2ccc3ccnc3c2)O</chem>               | 1.240 | 0.603 | 0.637 | 0.571 | 0.778 | 1.349 | 1.103 | 0.778 | 1.881 | 0.778 | 1.381 | -7.007 | 1.183.480 |
| 339 | <chem>e1ccc(c1)/C=N\NC(=O)c2ccc(cc2)C(=O)O)O</chem>            | 1.235 | 0.599 | 0.637 | 0.557 | 0.817 | 1.374 | 1.143 | 0.743 | 1.886 | 0.821 | 1.420 | -7.398 | 1.153.000 |
| 340 | <chem>Cc1nc2cc(ccc2c(n1)N)/C=N\NC(=O)c3ccc(c4c3cccc4)OC</chem> | 1.235 | 0.735 | 0.500 | 0.706 | 0.765 | 1.471 | 1.059 | 0.590 | 1.649 | 0.778 | 1.513 | -7.009 | 1.476.062 |
| 341 | <chem>COc1cccc1CC(=O)N/N=C\c2cccc2O</chem>                     | 1.234 | 0.581 | 0.652 | 0.545 | 0.750 | 1.295 | 1.130 | 0.834 | 1.964 | 0.746 | 1.327 | -6.715 | 1.127.465 |
| 342 | <chem>CC[C@H](CC#N)/C=N\NC(=O)c1ccc(c2c1cccc2)OC</chem>        | 1.233 | 0.688 | 0.546 | 0.618 | 0.671 | 1.289 | 1.196 | 0.745 | 1.941 | 0.667 | 1.354 | -6.006 | 1.281.539 |
| 343 | <chem>COc1ccc(c2c1cccc2)C(=O)N/N=C\C=C\c3ccoc3</chem>          | 1.233 | 0.687 | 0.546 | 0.632 | 0.671 | 1.303 | 1.144 | 0.746 | 1.889 | 0.667 | 1.354 | -6.007 | 1.313.838 |
| 344 | <chem>c1ccc(c1)/C=N\NC(=O)c2cccc(e2)[N+](=O)[O-])O</chem>      | 1.232 | 0.633 | 0.600 | 0.577 | 0.750 | 1.327 | 1.179 | 0.749 | 1.929 | 0.750 | 1.383 | -6.756 | 1.194.840 |
| 345 | <chem>c1ccc(c1)/C=N\NC(=O)c2ccc3ccc(=O)oc3e2)O</chem>          | 1.231 | 0.597 | 0.635 | 0.574 | 0.777 | 1.351 | 1.070 | 0.777 | 1.847 | 0.777 | 1.373 | -6.994 | 1.191.975 |
| 346 | <chem>CC(C)c1ccc(c1/C=N\NC(=O)c2ccc(c3c2cccc3)OC)C(C)C</chem>  | 1.228 | 0.713 | 0.516 | 0.684 | 0.680 | 1.364 | 1.063 | 0.680 | 1.743 | 0.680 | 1.393 | -6.128 | 1.427.901 |
| 347 | <chem>Cc1cccc1OC/C=N\NC(=O)c2ccc(c3c2cccc3)OC</chem>           | 1.225 | 0.677 | 0.548 | 0.643 | 0.672 | 1.315 | 1.085 | 0.747 | 1.832 | 0.669 | 1.346 | -6.022 | 1.339.003 |
| 348 | <chem>COc1ccc2ccc(cc2c1)C(=O)N/N=C\c3cccc3O</chem>             | 1.222 | 0.587 | 0.635 | 0.575 | 0.777 | 1.351 | 1.037 | 0.777 | 1.814 | 0.777 | 1.364 | -6.994 | 1.194.559 |

|     |                                                                         |       |       |       |       |       |       |       |       |       |       |       |        |           |
|-----|-------------------------------------------------------------------------|-------|-------|-------|-------|-------|-------|-------|-------|-------|-------|-------|--------|-----------|
| 349 | <chem>COc1ccc(c2c1cccc2)C(=O)N/N=C\C@@H]3CCNC3</chem>                   | 1.221 | 0.658 | 0.562 | 0.599 | 0.720 | 1.319 | 1.177 | 0.720 | 1.897 | 0.720 | 1.378 | -6.483 | 1.241.637 |
| 350 | <chem>c1ccc(c(c1)/C=N\NC(=O)c2nccs2)O</chem>                            | 1.220 | 0.526 | 0.694 | 0.482 | 0.778 | 1.260 | 1.209 | 0.866 | 2.074 | 0.774 | 1.300 | -6.969 | 993.487   |
| 351 | <chem>COc1ccc(c2c1cccc2)C(=O)N/N=C\C@H]3C=NC=N3</chem>                  | 1.217 | 0.655 | 0.562 | 0.601 | 0.720 | 1.321 | 1.159 | 0.720 | 1.879 | 0.720 | 1.375 | -6.483 | 1.246.279 |
| 352 | <chem>c1ccc(c(c1)/C=N\NC(=O)c2ceno2)O</chem>                            | 1.215 | 0.521 | 0.694 | 0.482 | 0.778 | 1.260 | 1.181 | 0.865 | 2.046 | 0.773 | 1.294 | -6.965 | 994.702   |
| 353 | <chem>COc1cccc(c1)CC(=O)N/N=C\c2ccccc2O</chem>                          | 1.212 | 0.554 | 0.658 | 0.528 | 0.754 | 1.282 | 1.098 | 0.838 | 1.936 | 0.749 | 1.304 | -6.749 | 1.092.902 |
| 354 | <chem>COc1cc(cc(c1)OC)C(=O)N/N=C\c2ccccc2O</chem>                       | 1.202 | 0.566 | 0.636 | 0.544 | 0.777 | 1.321 | 1.078 | 0.778 | 1.856 | 0.777 | 1.344 | -7.001 | 1.127.565 |
| 355 | <chem>c1ccc(c(c1)/C=N\NC(=O)c2ccoc2)O</chem>                            | 1.201 | 0.504 | 0.697 | 0.472 | 0.780 | 1.252 | 1.159 | 0.868 | 2.026 | 0.776 | 1.280 | -6.985 | 972.817   |
| 356 | <chem>COc1ccc(c2c1cccc2)C(=O)NCc3ccccc3O</chem>                         | 1.187 | 0.576 | 0.611 | 0.560 | 0.721 | 1.281 | 1.052 | 0.801 | 1.854 | 0.717 | 1.293 | -6.454 | 1.161.988 |
| 357 | <chem>c1ccc(c(c1)/C=N\N[C:1](=O)c2cccc(c2)O)O</chem>                    | 1.184 | 0.548 | 0.636 | 0.511 | 0.777 | 1.289 | 1.148 | 0.778 | 1.926 | 0.777 | 1.325 | -7.002 | 1.056.575 |
| 358 | <chem>COc1ccc(c2c1cccc2)C(=O)N/N=C\COCc3ccccc3</chem>                   | 1.173 | 0.627 | 0.546 | 0.612 | 0.671 | 1.283 | 1.040 | 0.746 | 1.785 | 0.667 | 1.294 | -6.006 | 1.274.826 |
| 359 | <chem>COc1ccc(c2c1cccc2)C(=O)N/N=C\C=C\c3ccccc3O</chem>                 | 1.169 | 0.668 | 0.501 | 0.637 | 0.667 | 1.304 | 1.078 | 0.667 | 1.746 | 0.667 | 1.335 | -6.008 | 1.326.565 |
| 360 | <chem>COc1ccc(c2c1cccc2)C(=O)NN3[C@@H](SCC3=O)c4ccccc4O</chem>          | 1.167 | 0.608 | 0.559 | 0.618 | 0.753 | 1.371 | 0.974 | 0.685 | 1.659 | 0.757 | 1.365 | -6.818 | 1.290.122 |
| 361 | <chem>COc1ccc(c2c1cccc2)C(=O)NN3[C@@H](SCC3=O)[c:2]4c<br/>cccc4O</chem> | 1.166 | 0.607 | 0.559 | 0.618 | 0.753 | 1.370 | 0.973 | 0.685 | 1.658 | 0.757 | 1.364 | -6.817 | 1.289.163 |

|     |                                                                |       |       |       |       |       |       |       |       |       |       |       |        |           |
|-----|----------------------------------------------------------------|-------|-------|-------|-------|-------|-------|-------|-------|-------|-------|-------|--------|-----------|
| 362 | <chem>COc1ccc(c2c1cccc2)C(=O)N/N=C\c3cccc(c3)c4[nH]nnn4</chem> | 1.163 | 0.716 | 0.447 | 0.687 | 0.758 | 1.445 | 1.062 | 0.522 | 1.584 | 0.778 | 1.494 | -7.007 | 1.434.572 |
| 363 | <chem>COc1ccc(c2c1cccc2)C(=O)N/N=C\c3ccc(cc3)c4[nH]nnn4</chem> | 1.154 | 0.706 | 0.447 | 0.682 | 0.758 | 1.440 | 1.054 | 0.522 | 1.576 | 0.778 | 1.484 | -7.006 | 1.423.474 |
| 364 | <chem>COc1ccc(c2c1cccc2)C(=O)OCc3ccccc3O</chem>                | 1.152 | 0.658 | 0.493 | 0.609 | 0.594 | 1.203 | 1.141 | 0.744 | 1.886 | 0.587 | 1.246 | -5.290 | 1.263.453 |
| 365 | <chem>Cc1c([nH]cn1)C(=O)N/N=C\c2ccccc2O</chem>                 | 1.139 | 0.558 | 0.581 | 0.512 | 0.771 | 1.283 | 1.194 | 0.702 | 1.896 | 0.775 | 1.334 | -6.984 | 1.056.421 |
| 366 | <chem>COc1ccc(c2c1cccc2)C(=O)N/N=C\ [C@@H](COc3ccccc3)O</chem> | 1.128 | 0.659 | 0.469 | 0.639 | 0.671 | 1.310 | 1.048 | 0.610 | 1.658 | 0.674 | 1.333 | -6.073 | 1.332.691 |
| 367 | <chem>COc1ccc(c2c1cccc2)C(=O)N/N=C/c3ccccc3CC(=O)N</chem>      | 1.115 | 0.503 | 0.612 | 0.539 | 0.759 | 1.298 | 0.884 | 0.759 | 1.643 | 0.759 | 1.262 | -6.837 | 1.123.794 |
| 368 | <chem>COc1ccc(c2c1cccc2)C(=O)[C@@H](c3c(cccn3)N)N=C</chem>     | 1.098 | 0.650 | 0.448 | 0.612 | 0.619 | 1.231 | 1.105 | 0.619 | 1.724 | 0.619 | 1.269 | -5.572 | 1.271.899 |
| 369 | <chem>Cc1ccsc1/C=N/NC(=O)c2ccc(c3c2ccccc3)OC</chem>            | 1.097 | 0.496 | 0.600 | 0.506 | 0.674 | 1.180 | 0.965 | 0.845 | 1.810 | 0.667 | 1.163 | -6.006 | 1.048.796 |
| 370 | <chem>B(c1ccccc1/C=N/NC(=O)c2ccc(c3c2ccccc3)OC)(O)O</chem>     | 1.088 | 0.488 | 0.600 | 0.521 | 0.674 | 1.195 | 0.884 | 0.845 | 1.730 | 0.667 | 1.155 | -6.006 | 1.084.902 |
| 371 | <chem>C/C(=C\CNNC(=O)c1ccc(c2c1cccc2)OC)/C=C/O</chem>          | 1.084 | 0.649 | 0.435 | 0.598 | 0.585 | 1.183 | 1.152 | 0.630 | 1.782 | 0.583 | 1.231 | -5.247 | 1.239.648 |
| 372 | <chem>CCN(CC)c1ccccc1/C=N/NC(=O)c2ccc(c3c2ccccc3)OC</chem>     | 1.084 | 0.483 | 0.600 | 0.530 | 0.674 | 1.204 | 0.846 | 0.845 | 1.691 | 0.667 | 1.150 | -6.006 | 1.105.567 |
| 373 | <chem>COc1ccc(c2c1cccc2)C(=O)N/N=C/Cc3ccccc3Cl</chem>          | 1.083 | 0.483 | 0.600 | 0.510 | 0.674 | 1.184 | 0.901 | 0.845 | 1.746 | 0.667 | 1.150 | -6.005 | 1.059.929 |
| 374 | <chem>COc1ccc(c2c1cccc2)/C(=N/CC[c:2]3ccccc3O)/N</chem>        | 1.082 | 0.664 | 0.418 | 0.618 | 0.560 | 1.178 | 1.127 | 0.622 | 1.750 | 0.557 | 1.221 | -5.014 | 1.284.076 |
| 375 | <chem>COc1ccc(c2c1cccc2)C(=O)N/N=C/c3cc(ccc3F)Cl</chem>        | 1.079 | 0.479 | 0.600 | 0.509 | 0.674 | 1.183 | 0.892 | 0.845 | 1.738 | 0.667 | 1.146 | -6.006 | 1.057.684 |

|     |                                                                    |       |       |       |       |       |       |       |       |       |       |       |        |           |
|-----|--------------------------------------------------------------------|-------|-------|-------|-------|-------|-------|-------|-------|-------|-------|-------|--------|-----------|
| 376 | <chem>COc1ccc(c2c1cccc2)C(=O)N/N=C/Cc3cccc3F</chem>                | 1.079 | 0.479 | 0.600 | 0.509 | 0.674 | 1.183 | 0.890 | 0.845 | 1.736 | 0.667 | 1.145 | -6.005 | 1.057.688 |
| 377 | <chem>CNS(=O)(=O)Cc1cccc1/C=N/NC(=O)c2ccc(c3c2cccc3)O</chem><br>C  | 1.078 | 0.507 | 0.571 | 0.551 | 0.763 | 1.314 | 0.864 | 0.694 | 1.558 | 0.767 | 1.275 | -6.912 | 1.150.779 |
| 378 | <chem>COc1ccc(c2c1cccc2)c3n[nH]c(=S)n3c4cccc4O</chem>              | 1.069 | 0.652 | 0.417 | 0.625 | 0.618 | 1.243 | 1.069 | 0.562 | 1.631 | 0.621 | 1.273 | -5.597 | 1.301.807 |
| 379 | <chem>COc1ccc(c2c1cccc2)C(=O)N/N=C/c3c(ccc(c3F)F)F</chem>          | 1.069 | 0.469 | 0.600 | 0.510 | 0.674 | 1.184 | 0.852 | 0.845 | 1.697 | 0.667 | 1.135 | -6.003 | 1.062.885 |
| 380 | <chem>COc1ccc(c2c1cccc2)C(=O)N/N=[CH:1]/C=C/c3cccc3</chem>         | 1.068 | 0.468 | 0.600 | 0.500 | 0.674 | 1.175 | 0.880 | 0.845 | 1.725 | 0.667 | 1.135 | -6.005 | 1.040.319 |
| 381 | <chem>CC(=O)NCc1cccc1/[CH:1]=N/NC(=O)c2ccc(c3c2cccc3)O</chem><br>C | 1.066 | 0.542 | 0.524 | 0.573 | 0.687 | 1.260 | 0.911 | 0.687 | 1.598 | 0.687 | 1.230 | -6.191 | 1.194.887 |
| 382 | <chem>COc1ccc(c2c1cccc2)c3n[nH]c(=S)n3[c:2]4cccc4O</chem>          | 1.058 | 0.639 | 0.419 | 0.618 | 0.620 | 1.238 | 1.056 | 0.564 | 1.620 | 0.623 | 1.262 | -5.614 | 1.285.837 |
| 383 | <chem>COc1ccc(c2c1cccc2)C(=O)N/N=C/c3cc(ccc3Cl)C(F)(F)F</chem>     | 1.050 | 0.450 | 0.600 | 0.506 | 0.674 | 1.181 | 0.800 | 0.845 | 1.645 | 0.667 | 1.116 | -6.006 | 1.056.799 |
| 384 | <chem>COc1ccc(c2c1cccc2)C(=O)N/N=C/c3encs3</chem>                  | 1.049 | 0.504 | 0.545 | 0.505 | 0.670 | 1.175 | 0.996 | 0.745 | 1.741 | 0.667 | 1.170 | -6.004 | 1.046.027 |
| 385 | <chem>CCCCc1cccc1/C=N/NC(=O)c2ccc(c3c2cccc3)OC</chem>              | 1.048 | 0.502 | 0.546 | 0.536 | 0.671 | 1.206 | 0.889 | 0.745 | 1.634 | 0.667 | 1.169 | -6.005 | 1.115.962 |
| 386 | <chem>COc1ccc(c2c1cccc2)C(=O)N/N=C/c3cccc3C(=O)C(F)(F)F</chem>     | 1.047 | 0.502 | 0.546 | 0.554 | 0.670 | 1.225 | 0.842 | 0.745 | 1.587 | 0.667 | 1.169 | -6.005 | 1.157.985 |
| 387 | <chem>COc1ccc(c2c1cccc2)C(=O)N/N=C/c3encs3</chem>                  | 1.047 | 0.501 | 0.546 | 0.507 | 0.671 | 1.177 | 0.979 | 0.745 | 1.724 | 0.667 | 1.168 | -6.005 | 1.050.452 |
| 388 | <chem>COc1ccc(c2c1cccc2)C(=O)N/N=C/c3cccc3OCCCF</chem>             | 1.043 | 0.498 | 0.546 | 0.540 | 0.671 | 1.211 | 0.863 | 0.745 | 1.608 | 0.667 | 1.164 | -6.006 | 1.127.014 |

|     |                                                            |       |       |       |       |       |       |       |       |       |       |       |        |           |
|-----|------------------------------------------------------------|-------|-------|-------|-------|-------|-------|-------|-------|-------|-------|-------|--------|-----------|
| 389 | <chem>CC(=O)c1cccc1/C=N/NC(=O)c2ccc(c3c2cccc3)OC</chem>    | 1.040 | 0.482 | 0.558 | 0.518 | 0.680 | 1.198 | 0.875 | 0.756 | 1.631 | 0.676 | 1.159 | -6.092 | 1.078.759 |
| 390 | <chem>Cc1ccoc1/C=N/NC(=O)c2ccc(c3c2cccc3)OC</chem>         | 1.039 | 0.494 | 0.546 | 0.507 | 0.671 | 1.178 | 0.948 | 0.745 | 1.694 | 0.667 | 1.160 | -6.006 | 1.052.917 |
| 391 | <chem>Cc1c(ocn1)/C=N/NC(=O)c2ccc(c3c2cccc3)OC</chem>       | 1.038 | 0.492 | 0.546 | 0.507 | 0.671 | 1.177 | 0.944 | 0.745 | 1.689 | 0.667 | 1.159 | -6.006 | 1.052.262 |
| 392 | <chem>COc1ccc(c2c1cccc2)S(=O)(=O)N/N=C/[c:2]3cccc3O</chem> | 1.037 | 0.493 | 0.544 | 0.516 | 0.740 | 1.255 | 0.919 | 0.673 | 1.591 | 0.744 | 1.237 | -6.699 | 1.072.203 |
| 393 | <chem>COc1ccc(c2c1cccc2)C(=O)N/N=C/c3cccc3C=C</chem>       | 1.036 | 0.490 | 0.546 | 0.517 | 0.671 | 1.188 | 0.905 | 0.745 | 1.650 | 0.667 | 1.157 | -6.006 | 1.075.293 |
| 394 | <chem>Cc1ccncc1/C=N/NC(=O)c2ccc(c3c2cccc3)OC</chem>        | 1.032 | 0.487 | 0.546 | 0.509 | 0.671 | 1.179 | 0.919 | 0.745 | 1.664 | 0.667 | 1.154 | -6.006 | 1.056.725 |
| 395 | <chem>CN(CC[c:2]1cccc1O)C(=O)c2ccc(c3c2cccc3)OC</chem>     | 1.031 | 0.645 | 0.386 | 0.615 | 0.501 | 1.116 | 1.081 | 0.628 | 1.709 | 0.495 | 1.141 | -4.463 | 1.279.533 |
| 396 | <chem>COc1ccc(c2c1cccc2)C(=O)N/N=C/C(=O)N3CCCCC3</chem>    | 1.030 | 0.485 | 0.546 | 0.511 | 0.671 | 1.182 | 0.903 | 0.745 | 1.649 | 0.667 | 1.152 | -6.006 | 1.063.124 |
| 397 | <chem>COc1ccc(c2c1cccc2)C(=O)N/N=C/c3cccc(c3C#N)Cl</chem>  | 1.030 | 0.479 | 0.551 | 0.514 | 0.675 | 1.190 | 0.873 | 0.751 | 1.624 | 0.671 | 1.150 | -6.047 | 1.070.886 |
| 398 | <chem>COc1cccc1/C=N/NC(=O)c2ccc(c3c2cccc3)OC</chem>        | 1.029 | 0.484 | 0.546 | 0.513 | 0.671 | 1.183 | 0.895 | 0.746 | 1.641 | 0.667 | 1.150 | -6.007 | 1.066.345 |
| 399 | <chem>COc1ccc(c2c1cccc2)C(=O)N/N=C/c3cccc(n3)F</chem>      | 1.028 | 0.482 | 0.546 | 0.506 | 0.671 | 1.177 | 0.910 | 0.745 | 1.655 | 0.667 | 1.149 | -6.006 | 1.051.834 |
| 400 | <chem>COc1cccc1C/C=N/NC(=O)c2ccc(c3c2cccc3)OC</chem>       | 1.027 | 0.476 | 0.551 | 0.513 | 0.675 | 1.187 | 0.869 | 0.750 | 1.619 | 0.671 | 1.147 | -6.043 | 1.067.031 |
| 401 | <chem>COc1ccc(c2c1cccc2)c3[nH]c(n3)[c:2]4cccc4O</chem>     | 1.026 | 0.552 | 0.474 | 0.558 | 0.684 | 1.243 | 0.981 | 0.606 | 1.587 | 0.689 | 1.242 | -6.208 | 1.161.167 |
| 402 | <chem>CCOc1ccc(cc1/C=N/NC(=O)c2ccc(c3c2cccc3)OC)Cl</chem>  | 1.025 | 0.479 | 0.546 | 0.520 | 0.671 | 1.191 | 0.859 | 0.745 | 1.604 | 0.667 | 1.146 | -6.006 | 1.083.985 |
| 403 | <chem>Cc1c(c(ccn1)/C=N/NC(=O)c2ccc(c3c2cccc3)OC)Cl</chem>  | 1.025 | 0.479 | 0.546 | 0.508 | 0.671 | 1.179 | 0.892 | 0.745 | 1.637 | 0.667 | 1.146 | -6.006 | 1.057.279 |

|     |                                                                      |       |       |       |       |       |       |       |       |       |       |       |        |           |
|-----|----------------------------------------------------------------------|-------|-------|-------|-------|-------|-------|-------|-------|-------|-------|-------|--------|-----------|
| 404 | <chem>CCOc1ccc(cc1/C=N/NC(=O)c2ccc(c3c2cccc3)OC)C</chem>             | 1.023 | 0.478 | 0.546 | 0.520 | 0.671 | 1.191 | 0.855 | 0.745 | 1.600 | 0.667 | 1.145 | -6.006 | 1.083.894 |
| 405 | <chem>CC(=O)Oc1cccc1/C=N/NC(=O)c2ccc(c3c2cccc3)OC</chem>             | 1.022 | 0.476 | 0.546 | 0.521 | 0.671 | 1.191 | 0.849 | 0.745 | 1.594 | 0.667 | 1.143 | -6.006 | 1.085.341 |
| 406 | <chem>COCCOc1cccc1/C=N/NC(=O)c2ccc(c3c2cccc3)OC</chem>               | 1.018 | 0.516 | 0.502 | 0.554 | 0.668 | 1.222 | 0.883 | 0.668 | 1.552 | 0.668 | 1.184 | -6.021 | 1.155.168 |
| 407 | <chem>COc1ccc(c2c1cccc2)C(=O)N/N=C/c3cccc3NS(=O)(=O)C</chem>         | 1.017 | 0.513 | 0.504 | 0.550 | 0.704 | 1.254 | 0.885 | 0.640 | 1.525 | 0.707 | 1.221 | -6.372 | 1.147.252 |
| 408 | <chem>CC(=O)Oc1ccc(cc1/C=N/NC(=O)c2ccc(c3c2cccc3)OC)Cl</chem>        | 1.015 | 0.469 | 0.546 | 0.520 | 0.671 | 1.191 | 0.827 | 0.745 | 1.572 | 0.667 | 1.136 | -6.006 | 1.085.504 |
| 409 | <chem>C/C(=N)NC(=O)c1ccc(c2c1cccc2)OC/c3cccc3O</chem>                | 1.013 | 0.513 | 0.500 | 0.534 | 0.667 | 1.201 | 0.930 | 0.667 | 1.597 | 0.667 | 1.180 | -6.008 | 1.109.908 |
| 410 | <chem>COc1cccc(c1F)/C=N/NC(=O)c2ccc(c3c2cccc3)OC</chem>              | 1.013 | 0.468 | 0.546 | 0.508 | 0.671 | 1.179 | 0.855 | 0.745 | 1.600 | 0.667 | 1.134 | -6.006 | 1.057.983 |
| 411 | <chem>CN(C)C(=O)c1cccc1/C=N/NC(=O)c2ccc(c3c2cccc3)OC</chem>          | 1.012 | 0.464 | 0.548 | 0.517 | 0.672 | 1.190 | 0.820 | 0.747 | 1.567 | 0.669 | 1.133 | -6.021 | 1.079.521 |
| 412 | <chem>CNC(=O)c1cccc1/C=N/NC(=O)c2ccc(c3c2cccc3)OC</chem>             | 1.010 | 0.492 | 0.518 | 0.532 | 0.682 | 1.214 | 0.869 | 0.682 | 1.551 | 0.682 | 1.175 | -6.145 | 1.108.640 |
| 413 | <chem>COc1ccc(c2c1cccc2)C(=O)N/N=C/c3cccc3OS(=O)(=O)C</chem>         | 1.008 | 0.479 | 0.529 | 0.526 | 0.692 | 1.218 | 0.844 | 0.691 | 1.535 | 0.692 | 1.171 | -6.229 | 1.097.412 |
| 414 | <chem>COc1ccc(c2c1cccc2)C(=O)N/N=C/c3cccc3OCCBr</chem>               | 1.004 | 0.504 | 0.500 | 0.537 | 0.667 | 1.204 | 0.891 | 0.667 | 1.557 | 0.667 | 1.171 | -6.005 | 1.119.245 |
| 415 | <chem>CC(=O)Oc1cccc(c1)/C=N/NC(=O)c2ccc(c3c2cccc3)OC</chem>          | 1.000 | 0.456 | 0.544 | 0.505 | 0.669 | 1.175 | 0.825 | 0.744 | 1.569 | 0.666 | 1.122 | -5.996 | 1.053.236 |
| 416 | <chem>COc1ccc(c2c1cccc2)C(=O)N/N=[CH:1]/c3cccc3CCO</chem>            | 0.999 | 0.487 | 0.513 | 0.520 | 0.678 | 1.198 | 0.884 | 0.678 | 1.562 | 0.678 | 1.165 | -6.106 | 1.081.997 |
| 417 | <chem>COc1ccc(c2c1cccc2)C(=O)N/N=[CH:1]/c3c(cccn3)C(=O)O</chem><br>C | 0.995 | 0.475 | 0.520 | 0.520 | 0.685 | 1.205 | 0.845 | 0.685 | 1.529 | 0.685 | 1.159 | -6.166 | 1.084.497 |

|     |                                                                |       |       |       |       |       |       |       |       |       |       |       |        |           |
|-----|----------------------------------------------------------------|-------|-------|-------|-------|-------|-------|-------|-------|-------|-------|-------|--------|-----------|
| 418 | <chem>Cn1cc(c2c1cccc2)/C=N/NC(=O)c3ccc(c4c3cccc4)OC</chem>     | 0.995 | 0.450 | 0.545 | 0.504 | 0.670 | 1.175 | 0.809 | 0.744 | 1.552 | 0.667 | 1.117 | -6.006 | 1.051.282 |
| 419 | <chem>Cn1ccnc1/C=N/NC(=O)c2ccc(c3c2cccc3)OC</chem>             | 0.995 | 0.495 | 0.500 | 0.509 | 0.667 | 1.175 | 0.947 | 0.667 | 1.614 | 0.667 | 1.161 | -6.004 | 1.056.349 |
| 420 | <chem>COc1ccc(c2c1cccc2)C(=O)N/N=C/Cc3cccc4c3cccc4</chem>      | 0.994 | 0.449 | 0.545 | 0.508 | 0.670 | 1.178 | 0.795 | 0.745 | 1.540 | 0.667 | 1.115 | -6.005 | 1.059.431 |
| 421 | <chem>CC(C)COc1cccc1/C=N/NC(=O)c2ccc(c3c2cccc3)OC</chem>       | 0.993 | 0.493 | 0.500 | 0.536 | 0.667 | 1.203 | 0.858 | 0.667 | 1.525 | 0.667 | 1.160 | -6.007 | 1.119.072 |
| 422 | <chem>COc1ccc(c2c1cccc2)C(=O)N/N=C/c3cc(ccc3OC)C(F)(F)F</chem> | 0.991 | 0.445 | 0.546 | 0.510 | 0.671 | 1.181 | 0.777 | 0.746 | 1.522 | 0.667 | 1.112 | -6.007 | 1.065.975 |
| 423 | <chem>COc1ccc(c2c1cccc2)C(=O)N/N=C/c3cccc(c3)OC(F)(F)F</chem>  | 0.989 | 0.444 | 0.545 | 0.504 | 0.670 | 1.174 | 0.789 | 0.745 | 1.534 | 0.667 | 1.111 | -6.003 | 1.052.089 |
| 424 | <chem>COc1ccc(c2c1cccc2)C(=O)N/N=C/c3cccc(n3)Br</chem>         | 0.986 | 0.486 | 0.500 | 0.506 | 0.667 | 1.173 | 0.922 | 0.667 | 1.589 | 0.667 | 1.152 | -6.006 | 1.051.852 |
| 425 | <chem>COc1ccc(c2c1cccc2)C(=O)N/N=C/c3ccc(cc3)C4CCCCC4</chem>   | 0.985 | 0.441 | 0.544 | 0.504 | 0.670 | 1.174 | 0.779 | 0.744 | 1.523 | 0.666 | 1.107 | -5.996 | 1.052.879 |
| 426 | <chem>CC(C)(C)Oc1cccc1/C=N/NC(=O)c2ccc(c3c2cccc3)OC</chem>     | 0.985 | 0.485 | 0.500 | 0.533 | 0.667 | 1.199 | 0.845 | 0.667 | 1.511 | 0.667 | 1.152 | -6.005 | 1.111.451 |
| 427 | <chem>COc1ccc(c2c1cccc2)C(=O)N/N=[CH:1]/c3cccc3OCCO</chem>     | 0.985 | 0.468 | 0.517 | 0.513 | 0.715 | 1.228 | 0.843 | 0.651 | 1.494 | 0.719 | 1.188 | -6.479 | 1.069.227 |
| 428 | <chem>CC(C)(C)COc1cccc1/C=N/NC(=O)c2ccc(c3c2cccc3)OC</chem>    | 0.983 | 0.483 | 0.500 | 0.536 | 0.667 | 1.203 | 0.831 | 0.667 | 1.498 | 0.667 | 1.150 | -6.007 | 1.118.426 |
| 429 | <chem>COCOCc1cccc1/[CH:1]=N/NC(=O)c2ccc(c3c2cccc3)OC</chem>    | 0.983 | 0.483 | 0.500 | 0.524 | 0.667 | 1.191 | 0.860 | 0.666 | 1.526 | 0.667 | 1.150 | -6.006 | 1.092.378 |
| 430 | <chem>Cc1cccc(c1N)/C=N/NC(=O)c2ccc(c3c2cccc3)OC</chem>         | 0.980 | 0.478 | 0.502 | 0.509 | 0.668 | 1.177 | 0.889 | 0.668 | 1.557 | 0.668 | 1.147 | -6.020 | 1.057.889 |
| 431 | <chem>COc1ccc(c2c1cccc2)C(=O)N/N=C/c3cccc(c3Cl)N</chem>        | 0.980 | 0.480 | 0.500 | 0.509 | 0.667 | 1.175 | 0.894 | 0.667 | 1.561 | 0.667 | 1.147 | -6.006 | 1.057.716 |
| 432 | <chem>COc1ccc(c2c1cccc2)C(=O)N/N=C/c3cccc(c3Cl)O</chem>        | 0.979 | 0.479 | 0.500 | 0.508 | 0.667 | 1.175 | 0.892 | 0.667 | 1.559 | 0.667 | 1.146 | -6.006 | 1.057.179 |



|     |                                                                    |       |       |       |       |       |       |       |       |       |       |       |        |           |
|-----|--------------------------------------------------------------------|-------|-------|-------|-------|-------|-------|-------|-------|-------|-------|-------|--------|-----------|
| 433 | <chem>CC(C)(C)Oc1ccc(cc1/C=N/NC(=O)c2ccc(c3e2cccc3)OC)Cl</chem>    | 0.978 | 0.477 | 0.500 | 0.532 | 0.667 | 1.199 | 0.823 | 0.667 | 1.490 | 0.667 | 1.144 | -6.007 | 1.110.834 |
| 434 | <chem>COc1ccc(c2c1cccc2)C(=O)N/N=C/c3cc(c[nH]c3=O)Cl</chem>        | 0.977 | 0.477 | 0.500 | 0.507 | 0.667 | 1.175 | 0.888 | 0.667 | 1.555 | 0.667 | 1.144 | -6.009 | 1.055.425 |
| 435 | <chem>COc1ccc(c2c1cccc2)C(=O)N/N=C/c3cc(ccc3F)O</chem>             | 0.977 | 0.477 | 0.500 | 0.508 | 0.667 | 1.175 | 0.885 | 0.667 | 1.552 | 0.667 | 1.144 | -6.006 | 1.057.713 |
| 436 | <chem>COc1ccc(c2c1cccc2)C(=O)Nn\3c(es/c3=N\c4cccc4O)O</chem>       | 0.977 | 0.555 | 0.422 | 0.592 | 0.652 | 1.244 | 0.898 | 0.545 | 1.443 | 0.660 | 1.214 | -5.940 | 1.236.444 |
| 437 | <chem>COc1ccc(c2c1cccc2)C(=O)Nn\3c(es/c3=N\c4cccc4O)O</chem>       | 0.977 | 0.555 | 0.422 | 0.592 | 0.652 | 1.244 | 0.898 | 0.545 | 1.443 | 0.660 | 1.214 | -5.940 | 1.236.418 |
| 438 | <chem>COc1ccc(c2c1cccc2)C(=O)N/N=C/c3cccc(c3)CN</chem>             | 0.975 | 0.475 | 0.500 | 0.505 | 0.667 | 1.172 | 0.887 | 0.667 | 1.554 | 0.667 | 1.141 | -6.005 | 1.050.592 |
| 439 | <chem>COc1ccc(c2c1cccc2)C(=O)N/N=C/c3c(ccc(c3Cl)N)Cl</chem>        | 0.974 | 0.474 | 0.500 | 0.510 | 0.667 | 1.176 | 0.871 | 0.667 | 1.538 | 0.667 | 1.141 | -6.006 | 1.060.747 |
| 440 | <chem>Cc1cc(c(c(e1)/C=N/NC(=O)c2ccc(c3e2cccc3)OC)O)C</chem>        | 0.970 | 0.469 | 0.502 | 0.508 | 0.668 | 1.176 | 0.858 | 0.668 | 1.526 | 0.668 | 1.137 | -6.019 | 1.057.938 |
| 441 | <chem>Cc1cc(c(c(e1)O)C)/C=N/NC(=O)c2ccc(c3e2cccc3)OC</chem>        | 0.969 | 0.469 | 0.500 | 0.508 | 0.667 | 1.175 | 0.859 | 0.667 | 1.526 | 0.667 | 1.136 | -6.006 | 1.057.443 |
| 442 | <chem>COc1ccc(c2c1cccc2)C(=O)N/N=C/c3cccc3NN</chem>                | 0.967 | 0.479 | 0.489 | 0.509 | 0.666 | 1.175 | 0.890 | 0.647 | 1.536 | 0.668 | 1.146 | -6.012 | 1.058.353 |
| 443 | <chem>CC(=O)Nc1cccc1/C=N/NC(=O)c2ccc(c3e2cccc3)OC</chem>           | 0.963 | 0.462 | 0.501 | 0.509 | 0.668 | 1.177 | 0.831 | 0.668 | 1.499 | 0.668 | 1.129 | -6.012 | 1.061.901 |
| 444 | <chem>COc1ccc(c2c1cccc2)C(=O)N/N=C/c3cc(ccc3Cl)[N+](=O)[O-]</chem> | 0.958 | 0.459 | 0.499 | 0.507 | 0.667 | 1.174 | 0.828 | 0.666 | 1.494 | 0.667 | 1.126 | -6.006 | 1.057.272 |
| 445 | <chem>COc1ccc(c2c1cccc2)C(=O)N/N=[CH:1]/e3ccc4cc[nH]c4c3</chem>    | 0.958 | 0.458 | 0.499 | 0.504 | 0.667 | 1.171 | 0.834 | 0.665 | 1.500 | 0.667 | 1.125 | -6.005 | 1.050.614 |
| 446 | <chem>COc1ccc(c2c1cccc2)C(=O)N/N=C/c3ccc(cc3C(=O)O)Cl</chem>       | 0.957 | 0.477 | 0.481 | 0.520 | 0.682 | 1.201 | 0.851 | 0.620 | 1.471 | 0.686 | 1.162 | -6.175 | 1.083.167 |

|     |                                                                    |       |       |       |       |       |       |       |       |       |       |       |        |           |
|-----|--------------------------------------------------------------------|-------|-------|-------|-------|-------|-------|-------|-------|-------|-------|-------|--------|-----------|
| 447 | <chem>COc1ccc(c2c1cccc2)C(=O)N/N=C/c3cc(ccc3F)[N+](=O)[O-]</chem>  | 0.956 | 0.457 | 0.500 | 0.507 | 0.667 | 1.174 | 0.821 | 0.666 | 1.487 | 0.667 | 1.124 | -6.006 | 1.057.676 |
| 448 | <chem>C[C@@H]1CCCN1/C=N/NC(=O)c2ccc(c3c2cccc3)OC</chem>            | 0.956 | 0.502 | 0.454 | 0.510 | 0.562 | 1.072 | 0.966 | 0.704 | 1.670 | 0.555 | 1.057 | -5.002 | 1.059.129 |
| 449 | <chem>COc1ccc(c2c1cccc2)C(=O)[C@@H](c3ccc(c(c3)O)C(=O)N)N=C</chem> | 0.955 | 0.563 | 0.392 | 0.581 | 0.591 | 1.172 | 0.948 | 0.538 | 1.486 | 0.595 | 1.158 | -5.356 | 1.210.870 |
| 450 | <chem>COc1ccc(c2c1cccc2)C(=O)N/N=C/N3CCCC3=O</chem>                | 0.955 | 0.500 | 0.455 | 0.511 | 0.562 | 1.073 | 0.959 | 0.705 | 1.664 | 0.556 | 1.056 | -5.006 | 1.061.005 |
| 451 | <chem>COc1ccc(c2c1cccc2)C(=O)[C@@H](c3ccc4c(c3)ncnc4N)N=C</chem>   | 0.953 | 0.622 | 0.331 | 0.631 | 0.547 | 1.177 | 0.978 | 0.456 | 1.434 | 0.553 | 1.175 | -4.979 | 1.316.729 |
| 452 | <chem>Cc1c2cccc2oc1/C=N/NC(=O)c3ccc(c4c3cccc4)OC</chem>            | 0.950 | 0.451 | 0.499 | 0.505 | 0.667 | 1.172 | 0.809 | 0.665 | 1.474 | 0.667 | 1.118 | -6.006 | 1.052.936 |
| 453 | <chem>COc1ccc(c2c1cccc2)C(=O)N/N=C/c3ccc4cccc4n3</chem>            | 0.950 | 0.450 | 0.500 | 0.504 | 0.667 | 1.171 | 0.807 | 0.666 | 1.474 | 0.667 | 1.117 | -6.007 | 1.051.819 |
| 454 | <chem>COc1ccc(c2c1cccc2)C(=O)N/N=C/c3ccc(cc3N)C(F)(F)F</chem>      | 0.950 | 0.448 | 0.502 | 0.507 | 0.668 | 1.175 | 0.795 | 0.668 | 1.464 | 0.668 | 1.117 | -6.019 | 1.057.465 |
| 455 | <chem>COc1ccc(c2c1cccc2)C(=O)N/N=C/c3ccc(s3)c4enco4</chem>         | 0.950 | 0.450 | 0.500 | 0.502 | 0.667 | 1.168 | 0.814 | 0.667 | 1.480 | 0.667 | 1.117 | -6.004 | 1.045.936 |
| 456 | <chem>COc1ccc(c2c1cccc2)C(=O)N/N=C/c3ccc(cc3O)C(F)(F)F</chem>      | 0.950 | 0.448 | 0.502 | 0.507 | 0.668 | 1.175 | 0.794 | 0.668 | 1.463 | 0.668 | 1.116 | -6.019 | 1.057.669 |
| 457 | <chem>COc1ccc(c2c1cccc2)C(=O)N/N=C/c3cnccc3O</chem>                | 0.949 | 0.486 | 0.463 | 0.509 | 0.664 | 1.173 | 0.916 | 0.604 | 1.520 | 0.668 | 1.154 | -6.016 | 1.057.253 |
| 458 | <chem>COc1ccc(c2c1cccc2)C(=O)[C@@H](c3cc(c(c3)O)OC)O</chem>        | 0.946 | 0.613 | 0.333 | 0.613 | 0.549 | 1.162 | 1.000 | 0.459 | 1.458 | 0.556 | 1.168 | -5.004 | 1.277.370 |

|     |                                                                    |       |       |       |       |       |       |       |       |       |       |       |        |           |
|-----|--------------------------------------------------------------------|-------|-------|-------|-------|-------|-------|-------|-------|-------|-------|-------|--------|-----------|
|     | N=C                                                                |       |       |       |       |       |       |       |       |       |       |       |        |           |
| 459 | <chem>COc1ccc(c2c1cccc2)C(=O)NNC(=S)Nc3cccc3O</chem>               | 0.944 | 0.574 | 0.370 | 0.579 | 0.602 | 1.181 | 0.984 | 0.490 | 1.474 | 0.610 | 1.184 | -5.493 | 1.205.597 |
| 460 | <chem>COCC[C@H]1CCCCN1/C=N/NC(=O)c2ccc(c3c2cccc3)OC</chem>         | 0.943 | 0.514 | 0.428 | 0.543 | 0.570 | 1.113 | 0.906 | 0.633 | 1.540 | 0.566 | 1.081 | -5.101 | 1.131.539 |
| 461 | <chem>COc1ccc(c2c1cccc2)C(=O)[C@@H](c3ccc(c(c3)N)C(=O)N)N=C</chem> | 0.942 | 0.551 | 0.391 | 0.573 | 0.590 | 1.163 | 0.936 | 0.537 | 1.473 | 0.593 | 1.144 | -5.344 | 1.193.721 |
| 462 | <chem>COc1ccc(c2c1cccc2)C(=O)N/N=C/c3cccc(c3Br)O</chem>            | 0.942 | 0.480 | 0.462 | 0.509 | 0.663 | 1.172 | 0.896 | 0.603 | 1.499 | 0.667 | 1.147 | -6.006 | 1.057.500 |
| 463 | <chem>COc1ccc(c2c1cccc2)C(=O)N/N=C/c3cccc3OCC(=O)N</chem>          | 0.941 | 0.480 | 0.462 | 0.529 | 0.663 | 1.192 | 0.838 | 0.603 | 1.441 | 0.667 | 1.147 | -6.006 | 1.103.162 |
| 464 | <chem>COc1ccc(c2c1cccc2)C(=O)N/N=C/c3cc(ccc3OC)N</chem>            | 0.936 | 0.474 | 0.462 | 0.512 | 0.663 | 1.175 | 0.864 | 0.603 | 1.467 | 0.667 | 1.141 | -6.007 | 1.066.119 |
| 465 | <chem>CN(C(=O)c1ccc(c2c1cccc2)OC)/N=C/c3cccc3O</chem>              | 0.933 | 0.552 | 0.381 | 0.560 | 0.524 | 1.084 | 0.976 | 0.582 | 1.559 | 0.521 | 1.073 | -4.691 | 1.164.788 |
| 466 | <chem>COc1cccc(c1N)/C=N/NC(=O)c2ccc(c3c2cccc3)OC</chem>            | 0.930 | 0.468 | 0.462 | 0.508 | 0.663 | 1.171 | 0.857 | 0.603 | 1.460 | 0.667 | 1.135 | -6.008 | 1.057.691 |
| 467 | <chem>COc1cc[c:1](c2c1cccc2)C(=O)NCCCNC(=O)c3cccc3O</chem>         | 0.925 | 0.567 | 0.357 | 0.590 | 0.553 | 1.143 | 0.937 | 0.503 | 1.440 | 0.556 | 1.123 | -5.006 | 1.230.648 |
| 468 | <chem>CC(C)c1ccc(c(c1)/C=N/NC(=O)c2ccc(c3c2cccc3)OC)O</chem>       | 0.923 | 0.461 | 0.462 | 0.507 | 0.663 | 1.171 | 0.835 | 0.603 | 1.438 | 0.667 | 1.128 | -6.008 | 1.057.198 |
| 469 | <chem>COc1ccc(c2c1cccc2)C(=O)N/N=[CH:1]/c3cccc3NC(=O)N</chem>      | 0.922 | 0.460 | 0.462 | 0.509 | 0.663 | 1.172 | 0.828 | 0.603 | 1.431 | 0.667 | 1.127 | -6.007 | 1.060.885 |
| 470 | <chem>COc1ccc(c2c1cccc2)C(=O)N/N=C/c3cccc(c3)S(=O)(=O)N</chem>     | 0.921 | 0.460 | 0.461 | 0.505 | 0.662 | 1.167 | 0.838 | 0.602 | 1.441 | 0.666 | 1.126 | -5.998 | 1.052.238 |
| 471 | <chem>COc1cccc1CO/C=N/NC(=O)c2ccc(c3c2cccc3)OC</chem>              | 0.916 | 0.462 | 0.455 | 0.509 | 0.562 | 1.071 | 0.833 | 0.704 | 1.538 | 0.556 | 1.017 | -5.005 | 1.059.919 |

|     |                                                                   |       |       |       |       |       |       |       |       |       |       |       |        |           |
|-----|-------------------------------------------------------------------|-------|-------|-------|-------|-------|-------|-------|-------|-------|-------|-------|--------|-----------|
| 472 | <chem>C[C@@H]1CC[C@H](N1/C=N/NC(=O)c2ccc(c3c2ccccc3)OC)COC</chem> | 0.915 | 0.498 | 0.417 | 0.526 | 0.559 | 1.085 | 0.901 | 0.621 | 1.522 | 0.556 | 1.053 | -5.005 | 1.095.794 |
| 473 | <chem>COc1ccc(c2c1cccc2)C(=O)N/N=C/c3cccc(c3)NS(=O)(=O)C</chem>   | 0.913 | 0.452 | 0.461 | 0.504 | 0.663 | 1.167 | 0.813 | 0.603 | 1.415 | 0.666 | 1.118 | -6.001 | 1.051.794 |
| 474 | <chem>COc1ccc(c2c1cccc2)C(=O)N/N=C/c3ccc4c(c3)OCCO4</chem>        | 0.911 | 0.450 | 0.461 | 0.503 | 0.663 | 1.166 | 0.808 | 0.603 | 1.411 | 0.667 | 1.117 | -6.006 | 1.049.607 |
| 475 | <chem>COc1ccc(c2c1cccc2)C(=O)N/N=C/c3cccc(c3O)C(=O)OC</chem>      | 0.910 | 0.448 | 0.462 | 0.507 | 0.663 | 1.170 | 0.796 | 0.603 | 1.400 | 0.667 | 1.116 | -6.008 | 1.057.342 |
| 476 | <chem>CCOC(=O)c1ccc(c(c1)/C=N/NC(=O)c2ccc(c3c2ccccc3)OC)O</chem>  | 0.904 | 0.443 | 0.462 | 0.507 | 0.663 | 1.170 | 0.778 | 0.603 | 1.381 | 0.667 | 1.109 | -6.004 | 1.058.240 |
| 477 | <chem>COc1cc[c:1](c2c1cccc2)SCc3cc(=O)[nH]c(n3)c4ccccc4O</chem>   | 0.904 | 0.550 | 0.354 | 0.580 | 0.549 | 1.128 | 0.915 | 0.499 | 1.414 | 0.552 | 1.102 | -4.969 | 1.209.640 |
| 478 | <chem>CN(C)C(=O)c1cccc(c1O)/C=N/NC(=O)c2ccc(c3c2ccccc3)O</chem>   | 0.904 | 0.442 | 0.462 | 0.506 | 0.663 | 1.170 | 0.776 | 0.603 | 1.379 | 0.667 | 1.109 | -6.008 | 1.057.423 |
| 479 | <chem>COc1ccc(c2c1cccc2)C(=O)N/N=[CH:1]/c3nc(no3)c4ccccc4</chem>  | 0.903 | 0.441 | 0.461 | 0.504 | 0.663 | 1.167 | 0.780 | 0.603 | 1.383 | 0.667 | 1.108 | -6.006 | 1.051.928 |
| 480 | <chem>COc1ccc(c2c1cccc2)C(=O)N/N=C/c3cc(=O)[nH]c(=O)[nH]3</chem>  | 0.900 | 0.472 | 0.429 | 0.506 | 0.660 | 1.165 | 0.875 | 0.550 | 1.426 | 0.667 | 1.139 | -6.006 | 1.052.223 |
| 481 | <chem>COc1ccc(c2c1cccc2)SCc3cc(=O)[nH]c(n3)[c:2]4ccccc4O</chem>   | 0.899 | 0.546 | 0.352 | 0.577 | 0.547 | 1.124 | 0.911 | 0.498 | 1.408 | 0.550 | 1.096 | -4.955 | 1.204.495 |

|     |                                                                         |       |       |       |       |       |       |       |       |       |       |       |        |           |
|-----|-------------------------------------------------------------------------|-------|-------|-------|-------|-------|-------|-------|-------|-------|-------|-------|--------|-----------|
| 482 | <chem>Cc1c(ccc(c1O)/C=N/NC(=O)c2ccc(c3c2cccc3)OC)O</chem>               | 0.898 | 0.467 | 0.430 | 0.508 | 0.661 | 1.169 | 0.854 | 0.552 | 1.406 | 0.668 | 1.136 | -6.019 | 1.058.052 |
| 483 | <chem>Cc1nc(on1)c2cccc(c2)/C=N/NC(=O)c3ccc(c4c3cccc4)OC</chem>          | 0.894 | 0.433 | 0.461 | 0.503 | 0.663 | 1.166 | 0.757 | 0.603 | 1.359 | 0.667 | 1.099 | -6.005 | 1.050.644 |
| 484 | <chem>COc1ccc(c2c1cccc2)C(=O)N/N=C/N3CCC[C@H]3CO</chem>                 | 0.889 | 0.504 | 0.385 | 0.519 | 0.556 | 1.074 | 0.948 | 0.556 | 1.504 | 0.556 | 1.060 | -5.005 | 1.077.025 |
| 485 | <chem>COc1ccc(c2c1cccc2)C(=O)N/N=C/c3c([nH]nn3)C(=O)N</chem>            | 0.887 | 0.486 | 0.401 | 0.517 | 0.666 | 1.182 | 0.892 | 0.501 | 1.394 | 0.678 | 1.164 | -6.107 | 1.074.906 |
| 486 | <chem>COc1ccc(c2c1cccc2)C(=O)N/N=C/c3cccc(c3O)C(=O)N</chem>             | 0.887 | 0.458 | 0.429 | 0.507 | 0.660 | 1.167 | 0.824 | 0.551 | 1.375 | 0.667 | 1.125 | -6.008 | 1.057.663 |
| 487 | <chem>COc1ccc(c2c1cccc2)C(=O)N/N=C/c3[nH]nnn3</chem>                    | 0.885 | 0.503 | 0.382 | 0.508 | 0.652 | 1.160 | 0.980 | 0.480 | 1.460 | 0.665 | 1.168 | -5.987 | 1.054.371 |
| 488 | <chem>COc1ccc(c2c1cccc2)C(=O)NNC(=O)[c:2]3cccc3O</chem>                 | 0.884 | 0.487 | 0.397 | 0.516 | 0.605 | 1.121 | 0.896 | 0.536 | 1.432 | 0.609 | 1.097 | -5.489 | 1.074.007 |
| 489 | <chem>COc1ccc(c2c1cccc2)C(=O)N/N=C/c3cccc3c4[nH]nnn4</chem>             | 0.882 | 0.488 | 0.395 | 0.540 | 0.695 | 1.234 | 0.835 | 0.478 | 1.313 | 0.712 | 1.200 | -6.417 | 1.126.707 |
| 490 | <chem>COc1ccc(c2c1cccc2)C(=O)N/N=C/c3ccc(c(c3O)C(=O)N)Cl</chem>         | 0.881 | 0.451 | 0.430 | 0.507 | 0.661 | 1.168 | 0.802 | 0.552 | 1.354 | 0.668 | 1.119 | -6.020 | 1.057.958 |
| 491 | <chem>COc1ccc(c2c1cccc2)C(=O)N/N=C/Oc3cccc4c3ccnc4</chem>               | 0.881 | 0.464 | 0.417 | 0.521 | 0.559 | 1.080 | 0.809 | 0.621 | 1.430 | 0.556 | 1.020 | -5.005 | 1.088.446 |
| 492 | <chem>CNC(=O)c1cccc(c1O)/C=N/NC(=O)c2ccc(c3c2cccc3)OC</chem>            | 0.878 | 0.449 | 0.429 | 0.507 | 0.660 | 1.166 | 0.798 | 0.551 | 1.349 | 0.667 | 1.116 | -6.008 | 1.057.566 |
| 493 | <chem>COc1ccc(c2c1cccc2)C(=O)N/N=C/N3CCc4cccc4C3</chem>                 | 0.872 | 0.456 | 0.417 | 0.506 | 0.559 | 1.065 | 0.821 | 0.621 | 1.442 | 0.556 | 1.011 | -5.005 | 1.055.104 |
| 494 | <chem>CCNC(=O)c1cccc(c1O)/C=N/NC(=O)c2ccc(c3c2cccc3)OC</chem>           | 0.868 | 0.440 | 0.429 | 0.505 | 0.659 | 1.164 | 0.774 | 0.550 | 1.324 | 0.667 | 1.107 | -6.005 | 1.054.774 |
| 495 | <chem>COC[C@@H]1C[C@@H](CN1/C=N/NC(=O)c2ccc(c3c2cc<br/>cc3)OC)OC</chem> | 0.868 | 0.483 | 0.385 | 0.523 | 0.556 | 1.078 | 0.865 | 0.556 | 1.420 | 0.556 | 1.039 | -5.005 | 1.088.767 |

|     |                                                             |       |       |       |       |       |       |       |       |       |       |       |        |           |
|-----|-------------------------------------------------------------|-------|-------|-------|-------|-------|-------|-------|-------|-------|-------|-------|--------|-----------|
| 496 | <chem>COc1ccc(c2c1cccc2)C(=O)N/N=C/c3cc(ccc3O)C(=O)O</chem> | 0.859 | 0.461 | 0.397 | 0.510 | 0.653 | 1.163 | 0.829 | 0.504 | 1.332 | 0.664 | 1.125 | -5.978 | 1.063.023 |
| 497 | <chem>CC(C)Oc1ccc(cc1/C=N/NC(=O)c2cccc3c2cccc3)Cl</chem>    | 0.844 | 0.427 | 0.417 | 0.474 | 0.559 | 1.033 | 0.811 | 0.621 | 1.432 | 0.556 | 0.983 | -5.007 | 986.426   |
| 498 | <chem>C/C(=N\NC(=O)Cc1ccc(c2c1cccc2)OC)/[c:2]3cccc3O</chem> | 0.838 | 0.445 | 0.393 | 0.490 | 0.564 | 1.054 | 0.830 | 0.564 | 1.394 | 0.564 | 1.010 | -5.084 | 1.019.937 |
| 499 | <chem>COc1ccc(c2c1cccc2)c3nnc(s3)Nc4cccc4O</chem>           | 0.825 | 0.445 | 0.379 | 0.486 | 0.585 | 1.071 | 0.844 | 0.519 | 1.362 | 0.589 | 1.035 | -5.307 | 1.010.123 |
| 500 | <chem>COc1ccc(c2c1cccc2)c3nnc(s3)Nc4cccc4O</chem>           | 0.824 | 0.445 | 0.379 | 0.485 | 0.585 | 1.070 | 0.843 | 0.519 | 1.362 | 0.589 | 1.034 | -5.308 | 1.009.294 |

**Table S 2.** Score Values for ligands screened in AutoDock Vina, Molegro Virtual Docker (MVD) and Gold docking programs based on consensual docking methodology.

| <b>Ligand</b> | <b>AutoDock Vina</b> | <b>MVD</b>     | <b>Gold</b>  |
|---------------|----------------------|----------------|--------------|
| <b>AOS1</b>   | <b>-7.4</b>          | <b>-105.68</b> | <b>25.19</b> |
| <b>AOS2</b>   | <b>-7.3</b>          | <b>-116.62</b> | <b>23.01</b> |
| <b>AOS3</b>   | <b>-8.2</b>          | <b>-122.11</b> | <b>25.93</b> |
| <b>AOS4</b>   | <b>-7.6</b>          | <b>-107.98</b> | <b>25.25</b> |
| <b>AOS5</b>   | <b>-7.4</b>          | <b>-119.32</b> | <b>24.76</b> |
| <b>AOS6</b>   | <b>-7.4</b>          | <b>-127.45</b> | <b>23.52</b> |
| <b>AOS</b>    | <b>-7.2</b>          | <b>-93.22</b>  | <b>22.31</b> |

1. NMR spectra of compounds **AOS1**, **AOS2**, **AOS3**, **AOS4**, **AOS5**, **AOS6**, **AOS1'** and **AOS6'**.

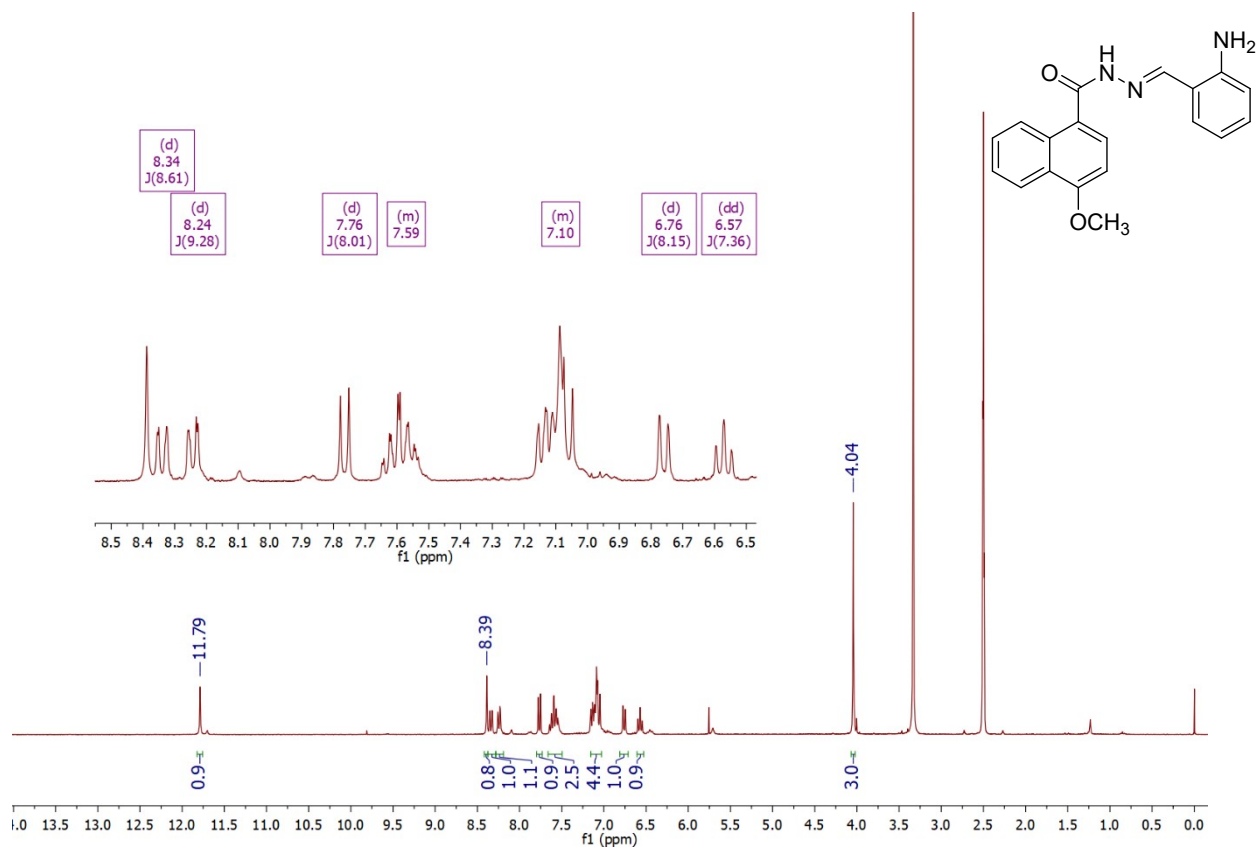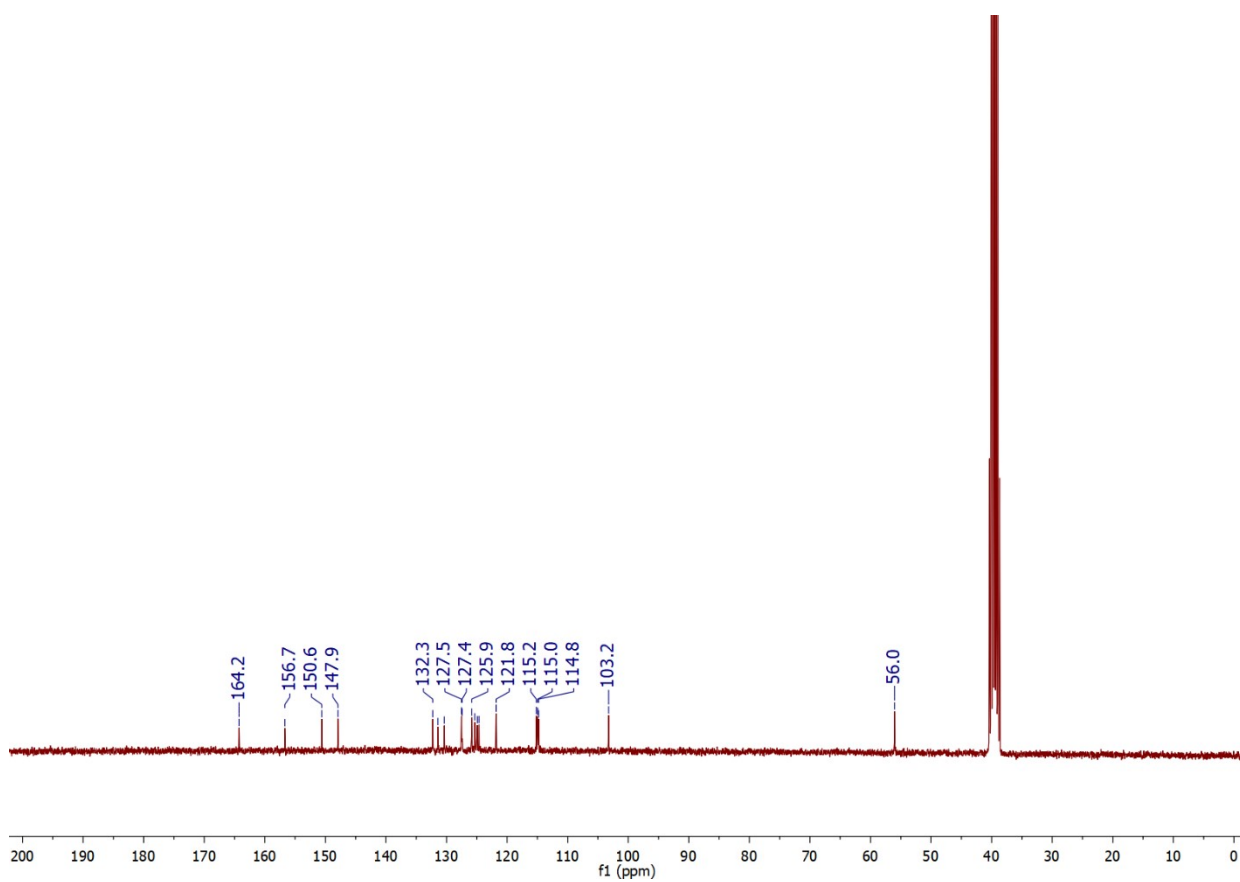



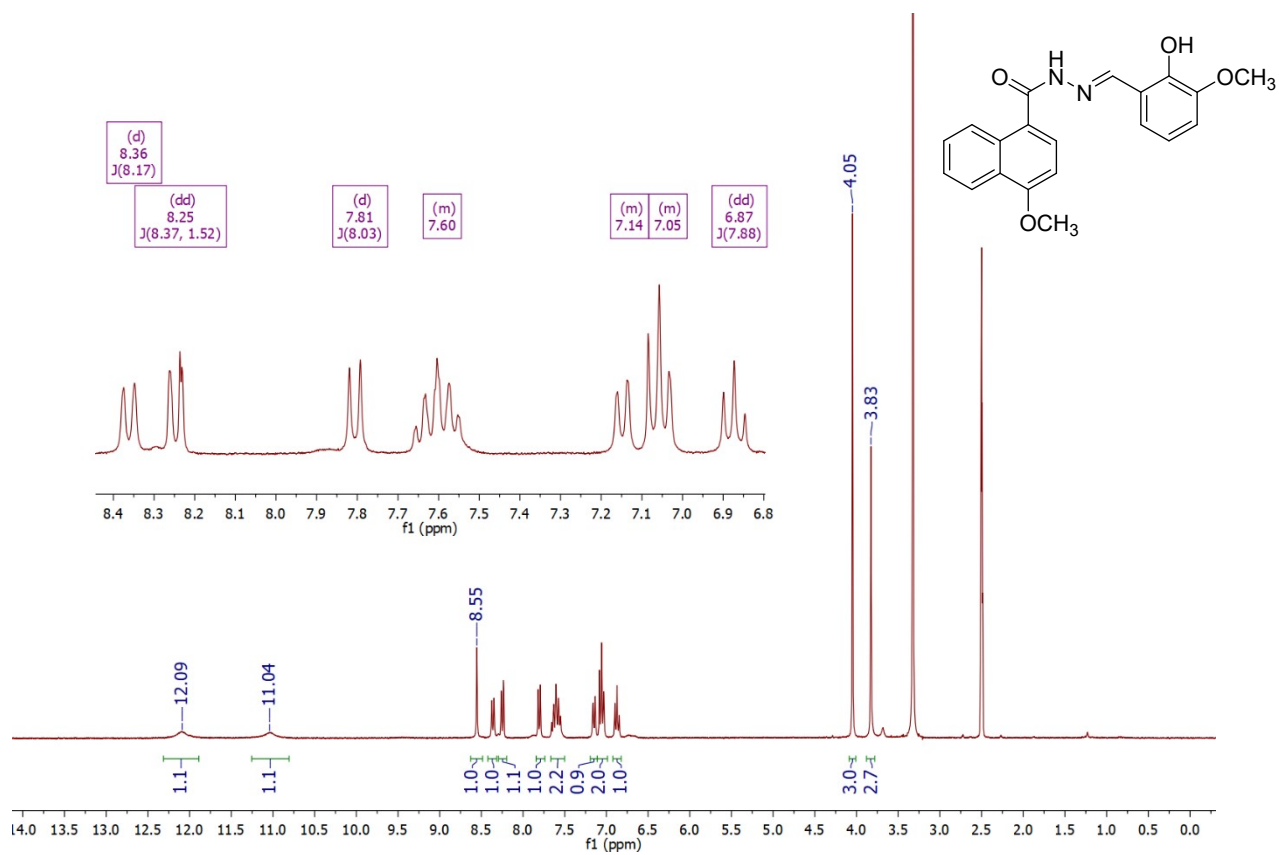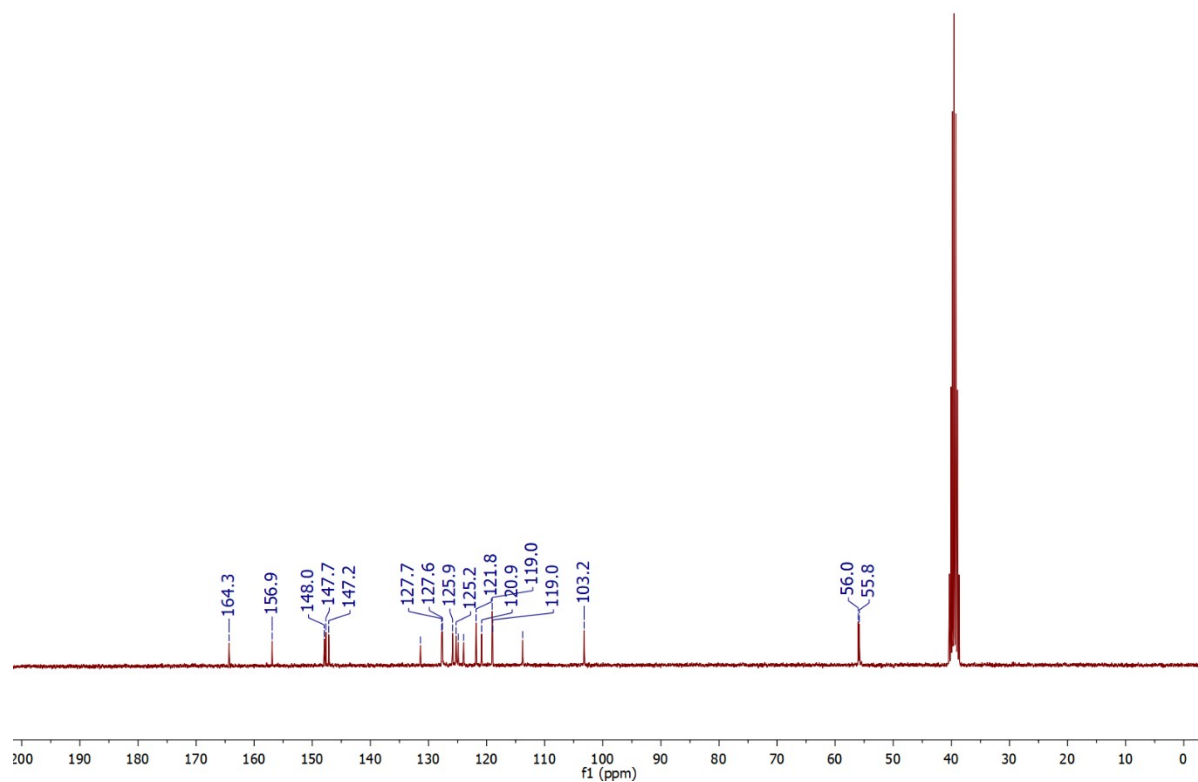

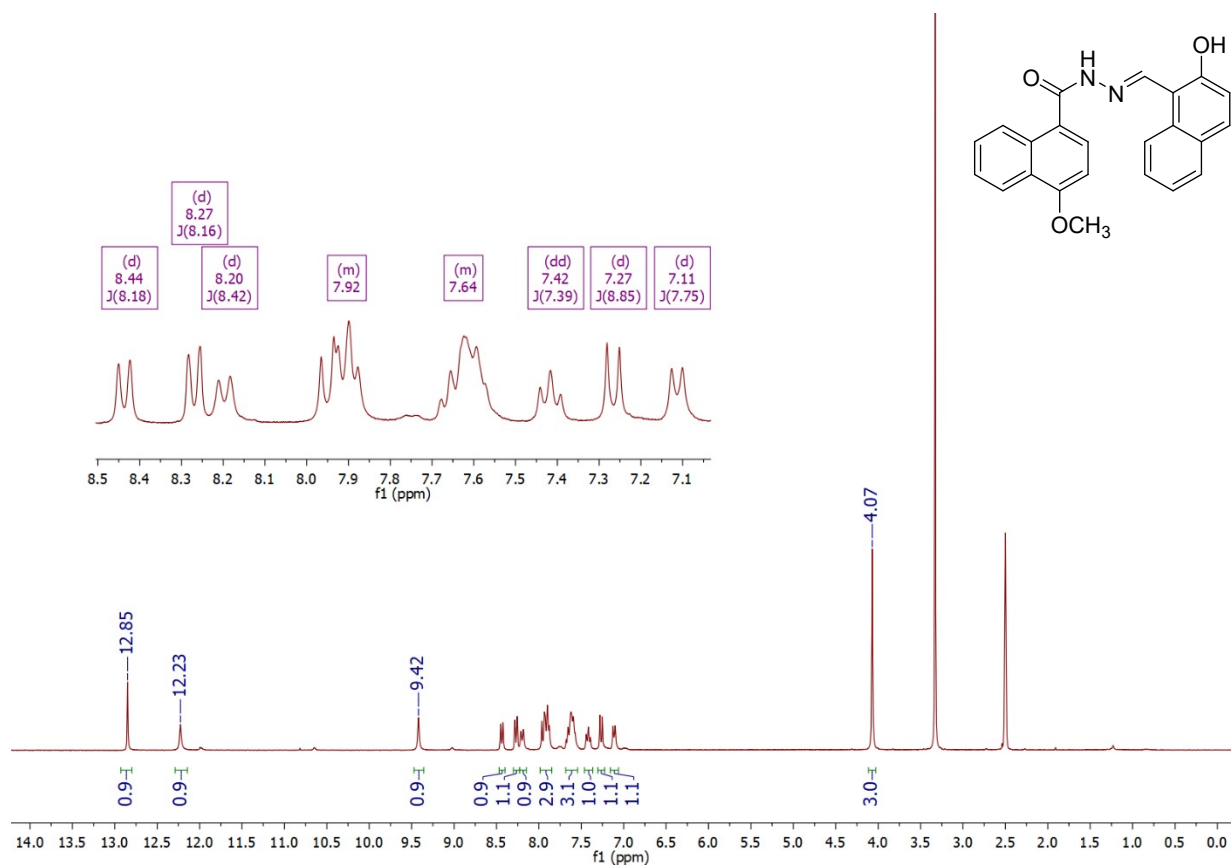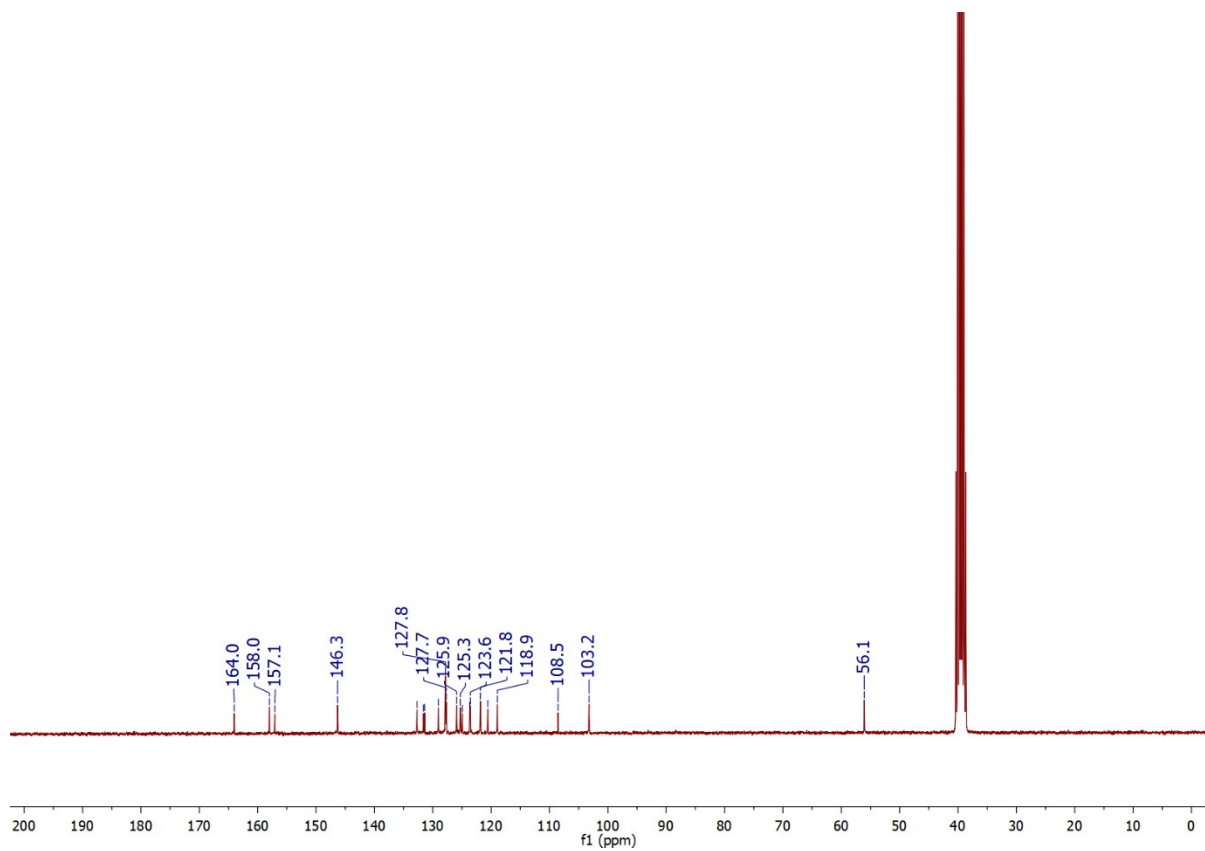

**Figure S5.** <sup>1</sup>H NMR spectra of AOS3 in DMSO-d<sub>6</sub>

**Figure S6.** <sup>13</sup>C NMR spectra of AOS3 in DMSO-d<sub>6</sub>

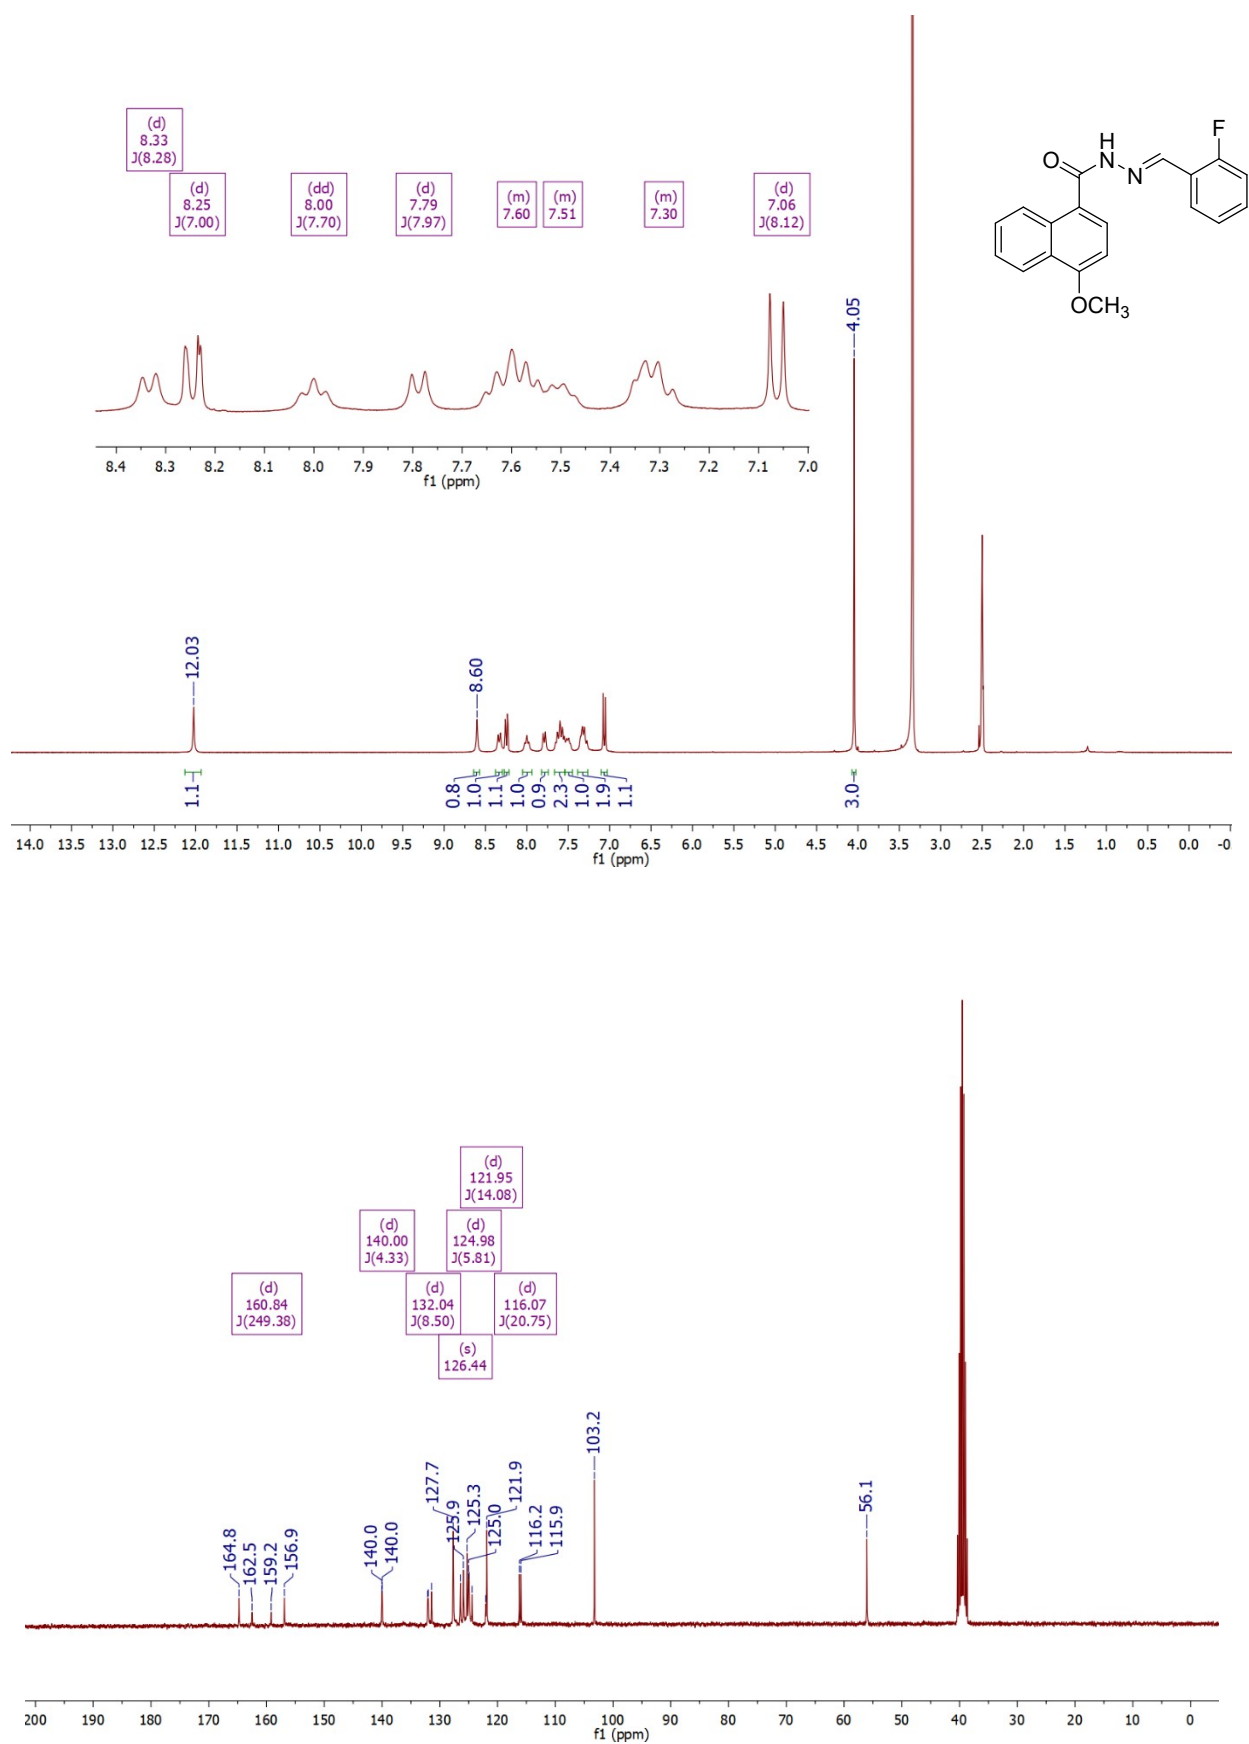

Figure S7. <sup>1</sup>H NMR spectra of AOS4 in DMSO-d<sub>6</sub>

**Figure S8.**  $^{13}\text{C}$  NMR spectra of **AOS4** in  $\text{DMSO-d}_6$

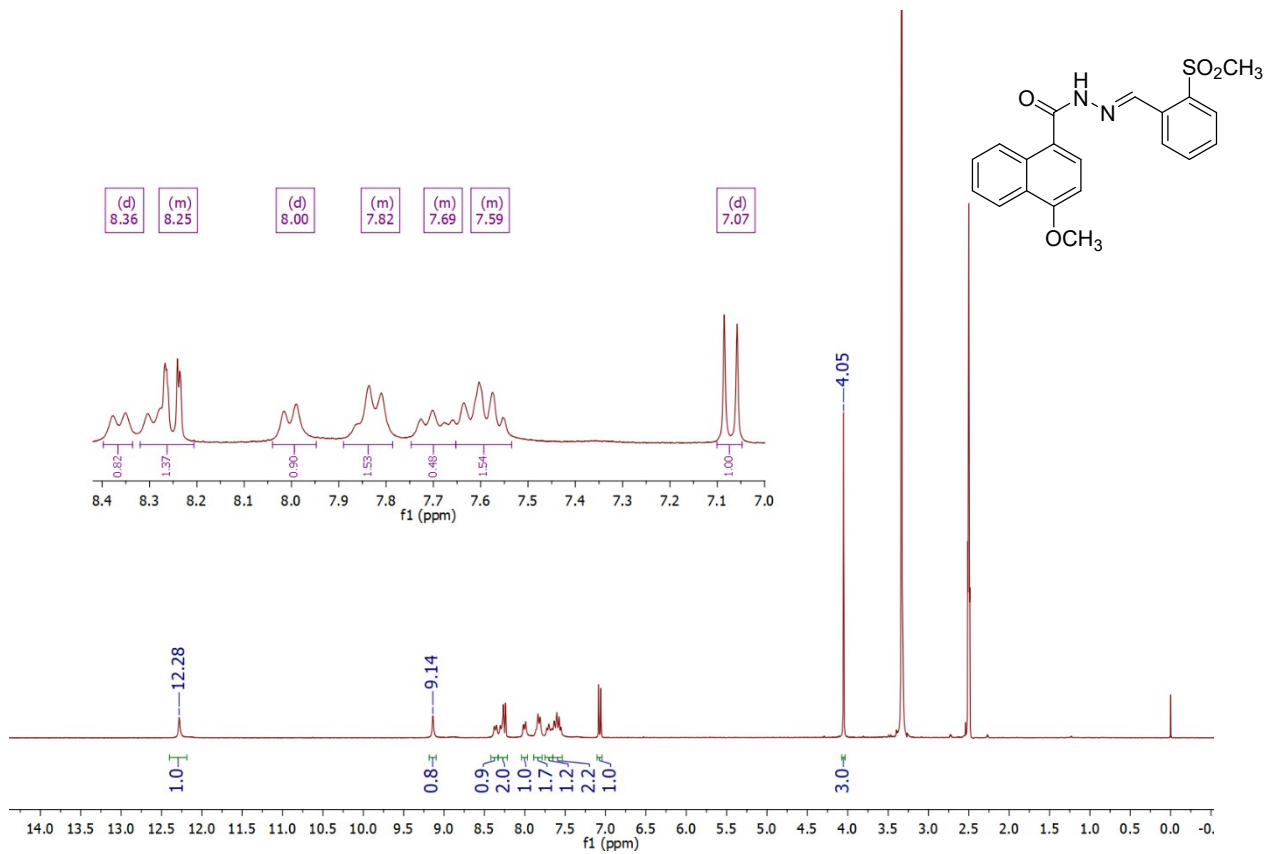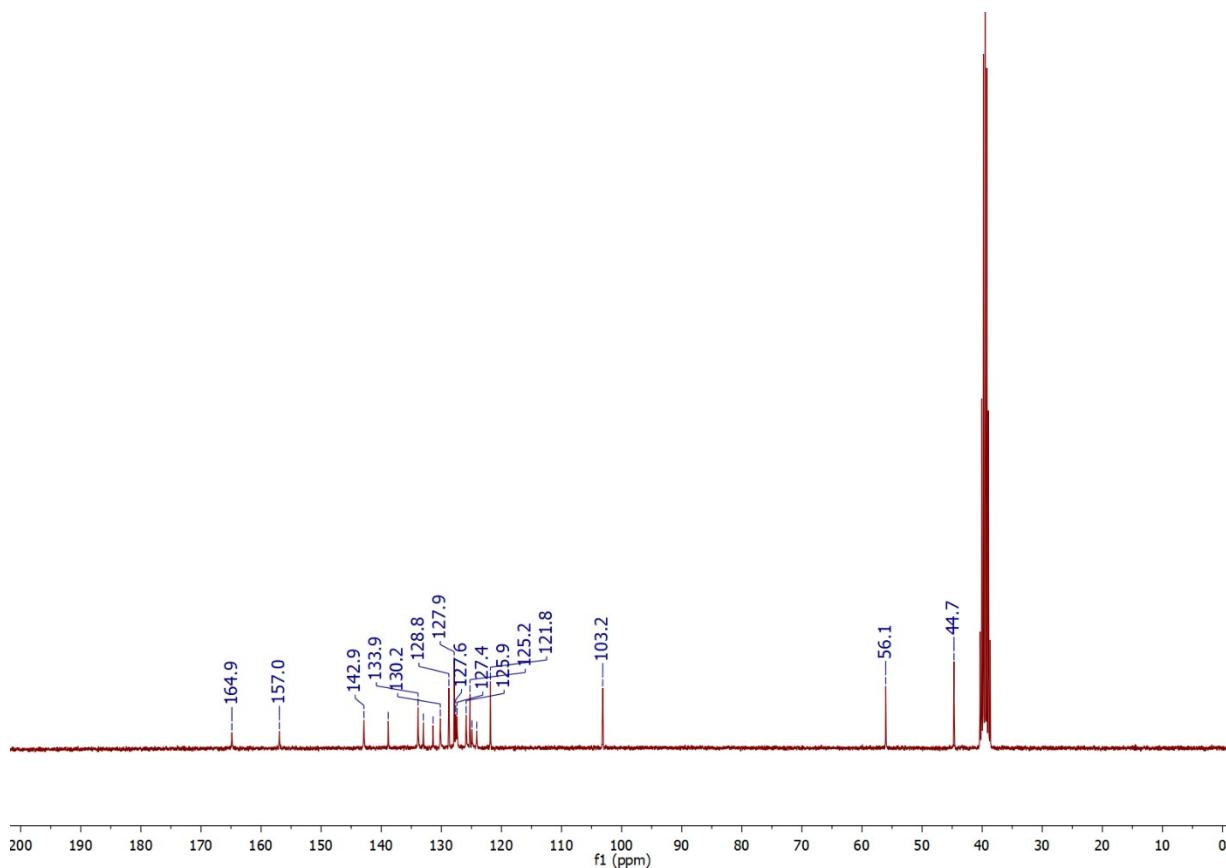

**Figure S9.** <sup>1</sup>H NMR spectra of AOS5 in DMSO-d<sub>6</sub>

**Figure S10.** <sup>13</sup>C NMR spectra of AOS5 in DMSO-d<sub>6</sub>

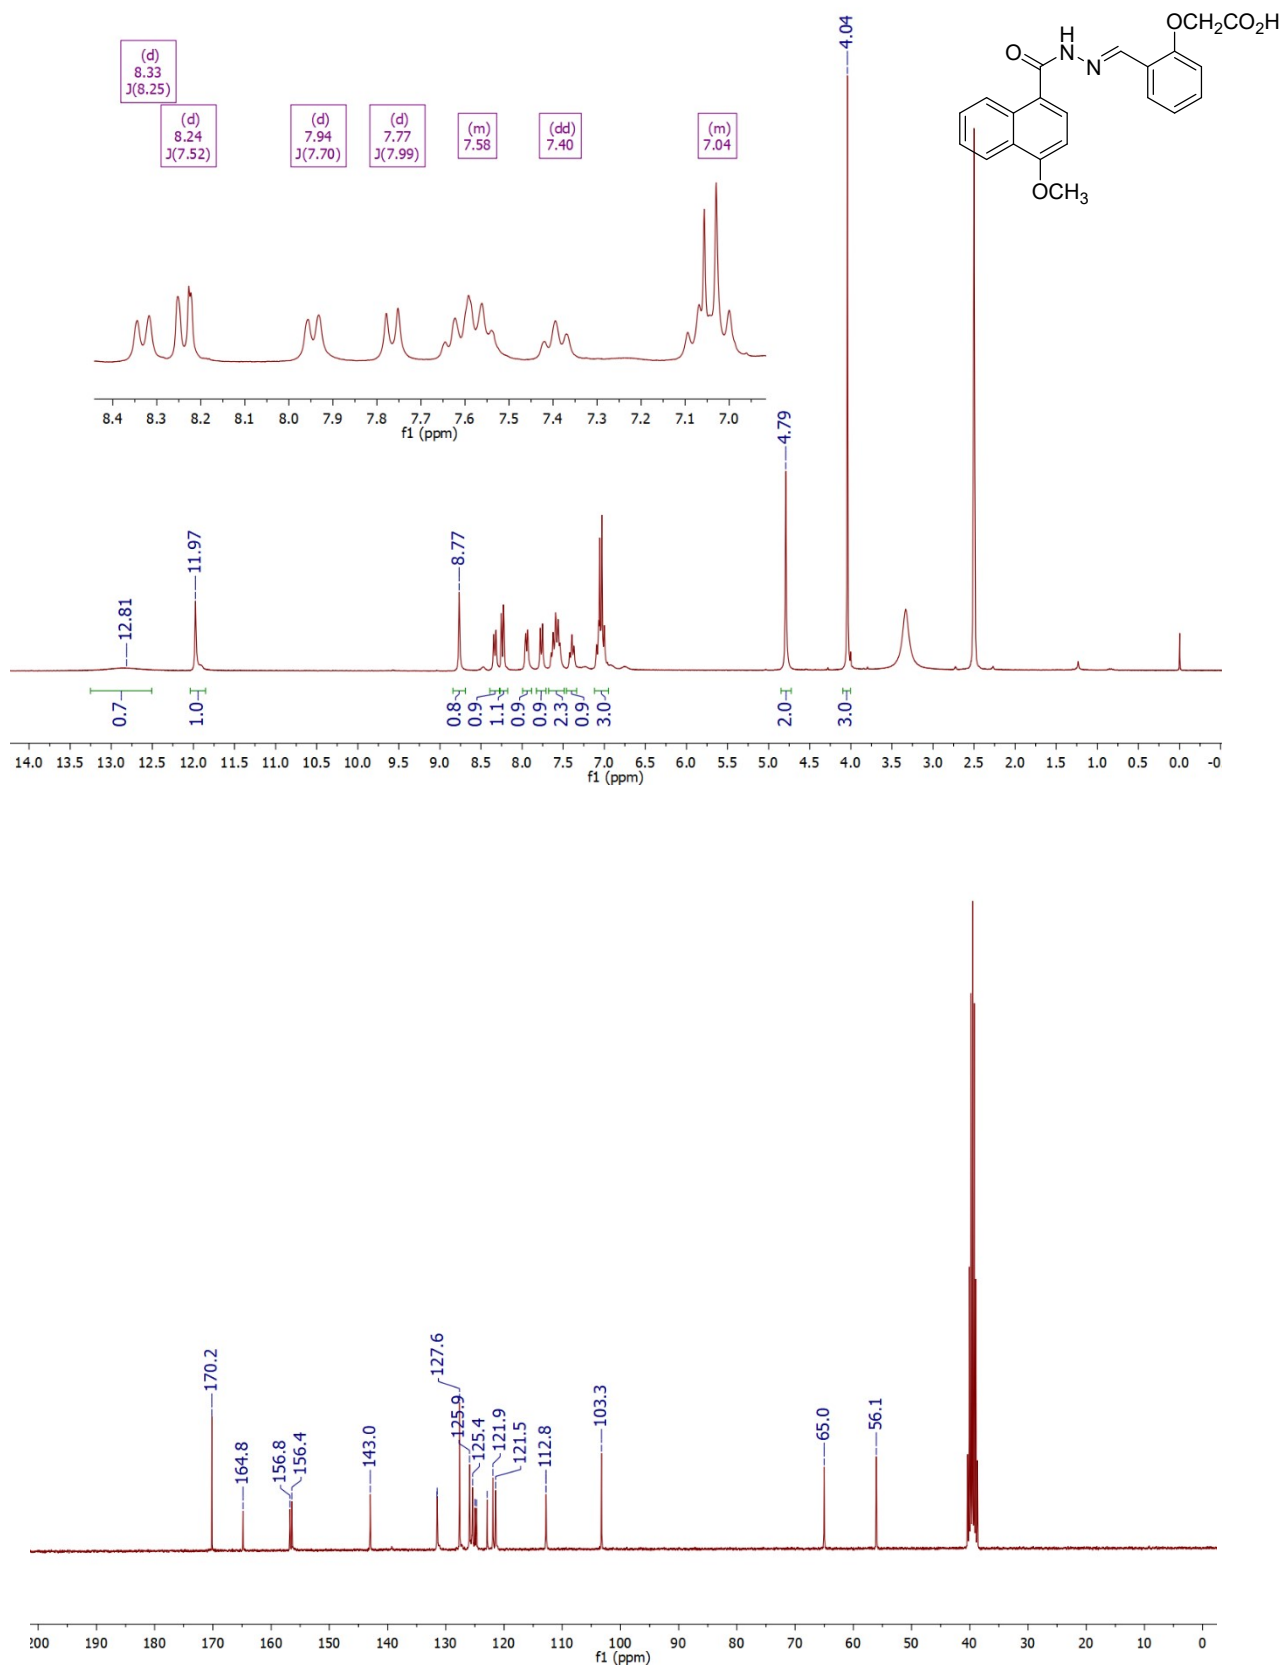

**Figure S11.**  $^1\text{H}$  NMR spectra of AOS6 in  $\text{DMSO-d}_6$

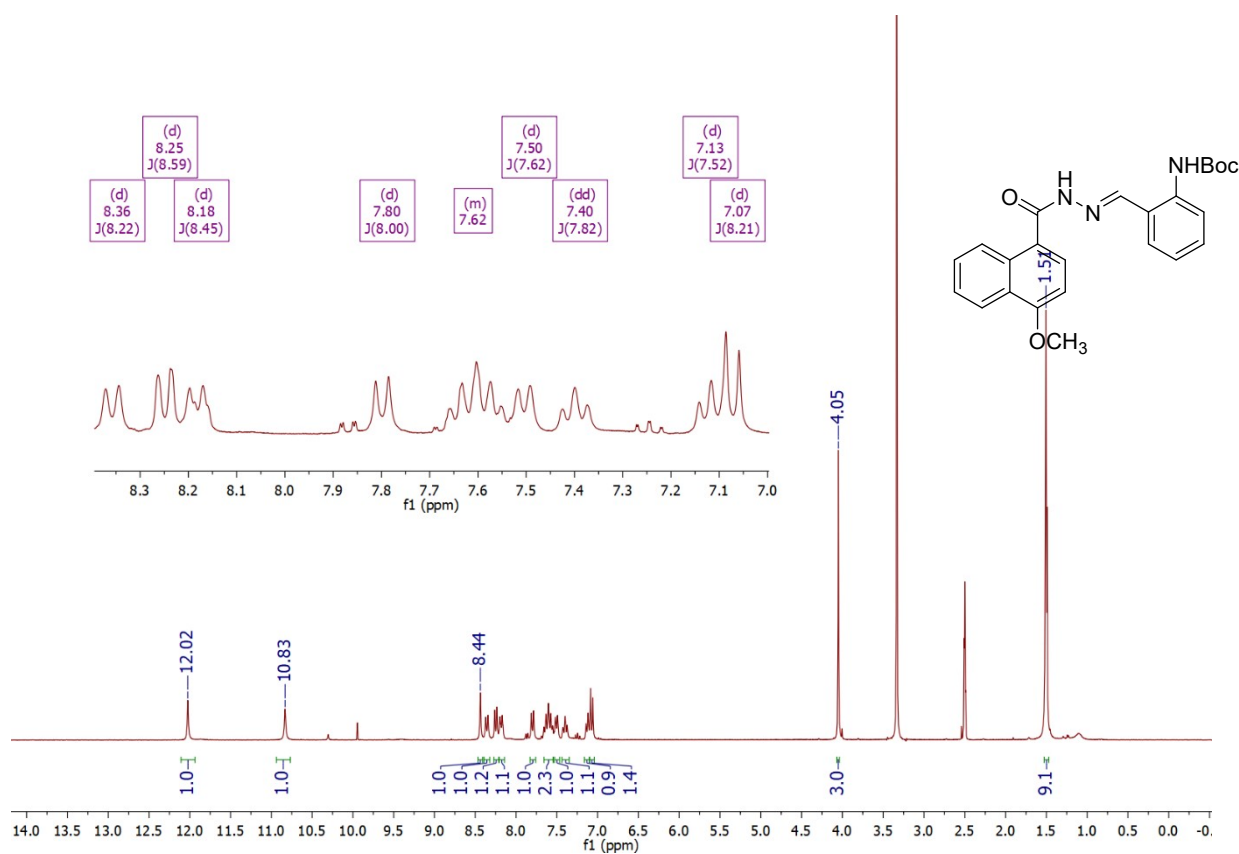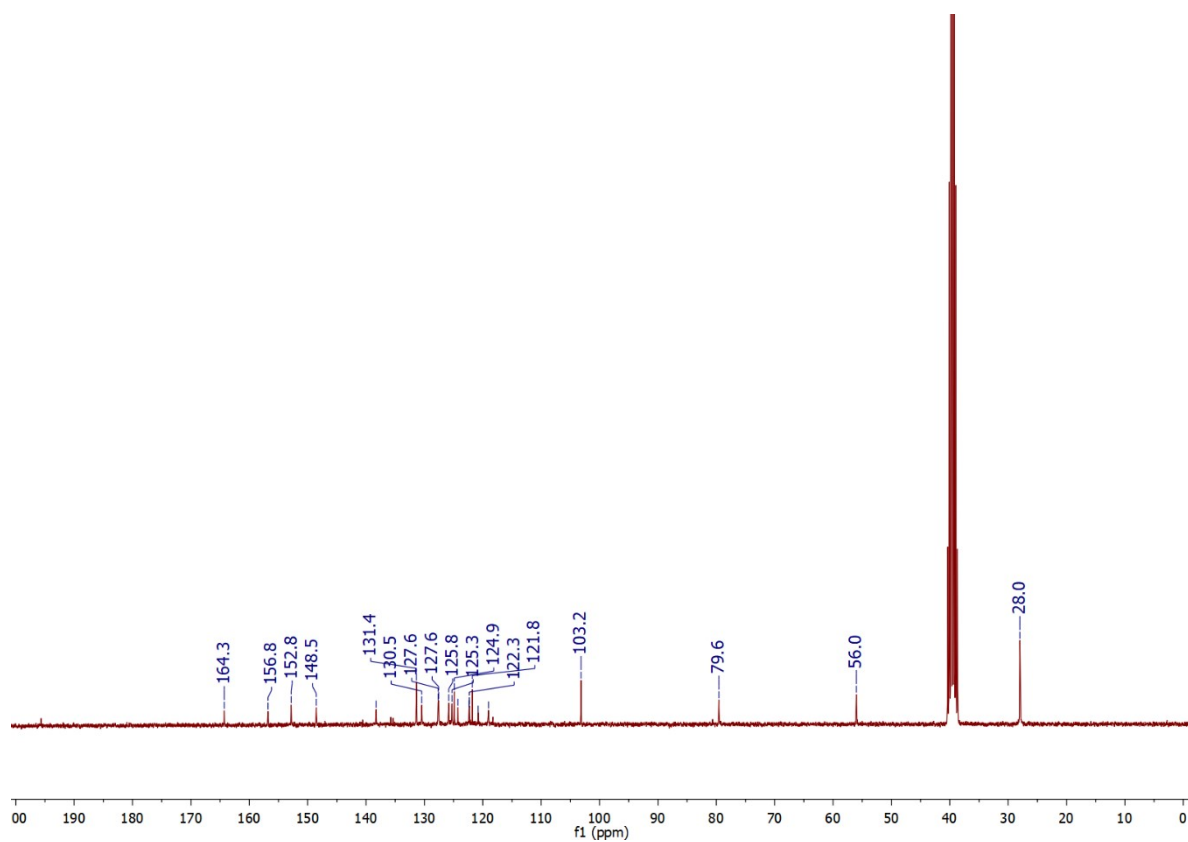

**Figure S12.** <sup>13</sup>C NMR spectra of AOS6 in DMSO-d<sub>6</sub>

**Figure S13.** <sup>1</sup>H NMR spectra of AOS1' in DMSO-d<sub>6</sub>

**Figure S14.**  $^{13}\text{C}$  NMR spectra of **AOS1'** in  $\text{DMSO-d}_6$



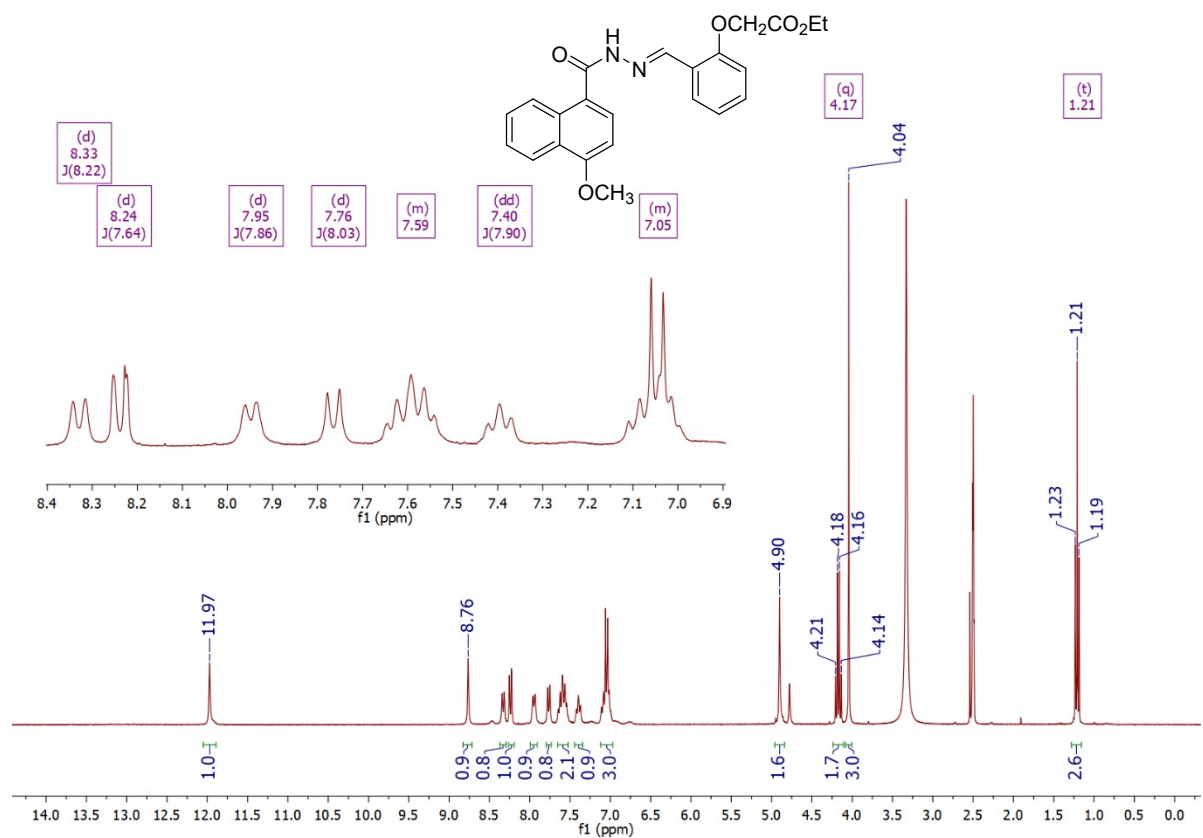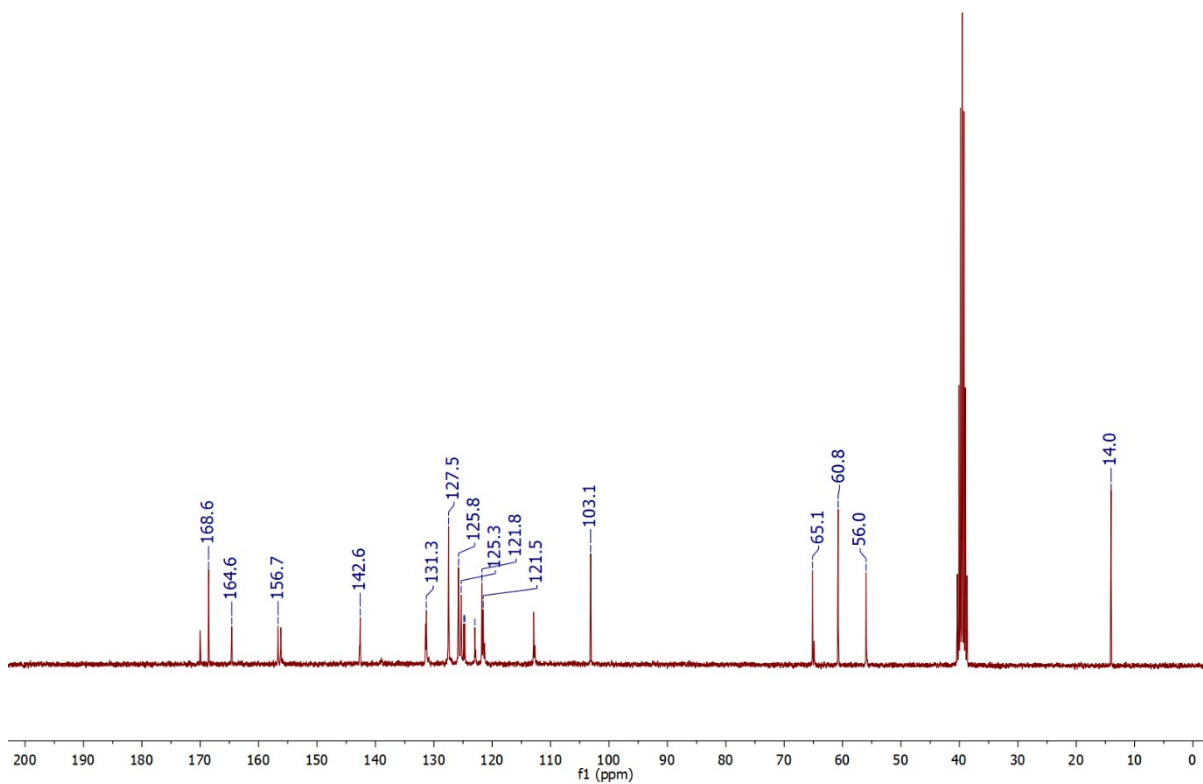

**Figure S15.** <sup>1</sup>H NMR spectra of AOS6' in DMSO-d<sub>6</sub>

**Figure S16.** <sup>13</sup>C NMR spectra of AOS6' in DMSO-d<sub>6</sub>

**Table S3.** Contact frequency (in percentage of time contact) of PbHSD residues with **AOS2** and **AOS3** ligands throughout the molecular dynamics simulation. The values in bold represent the contacts shown in Figure 5. Only contacts with a frequency greater than 5% are shown.

| <b>Residue number</b> | <b>AOS2</b> | <b>AOS3</b> |
|-----------------------|-------------|-------------|
| Pro-120               | -           | 26.3        |
| Lys-122               | -           | <b>57.9</b> |
| Val-15                | 33.0        | -           |
| Ser-150               | 49.6        | 100.0       |
| Thr-151               | <b>49.0</b> | 99.8        |
| Val-152               | -           | 99.1        |
| Gly-153               | 11.4        | 95.5        |
| Ala-154               | <b>40.5</b> | <b>99.6</b> |
| Phe-179               | <b>25.9</b> | 98.6        |
| Ser-180               | -           | 71.9        |
| Gly-181               | <b>59.6</b> | 98.8        |
| Thr-182               | <b>91.3</b> | 91.6        |
| Phe-185               | 6.9         | 4.3         |
| Leu-214               | 23.8        | 0.1         |
| Gly-215               | <b>85.0</b> | 16.3        |
| Tyr-216               | <b>91.1</b> | 99.5        |
| Thr-217               | 42.3        | -           |
| Glu-218               | 49.4        | 1.0         |
| Pro-219               | 26.3        | -           |
| Lys-233               | <b>26.3</b> | <b>99.3</b> |
| Ser-327               | <b>47.1</b> | 82.5        |
| Asn-329               | 43.1        | 99.7        |
| Arg-337               | -           | 35.8        |
| Lys-340               | -           | 11.2        |
| Gly-349               | 50.7        | 100.0       |
| Ala-350               | <b>97.7</b> | <b>97.8</b> |
| Gly-351               | 99.9        | <b>98.4</b> |
| Gly-352               | 29.6        | 24.9        |
| Val-354               | 33.7        | -           |
| Thr-355               | 94.6        | 90.0        |
| NAD                   | 100.0       | 57.2        |
